# Supplementary material for: A human endogenous retrovirus encoded protease potentially cleaves numerous cellular proteins
Source: Mob DNA. 2019 Aug 22;10:36. doi: 10.1186/s13100-019-0178-z (PMC6707001; doi:10.1186/s13100-019-0178-z)
Supplement: Supplementary file 1 — Tables S1a–d. Results of TAILS analyses at pH 5.5 and pH 7 showing replicates 1 and 2 for each. Table S2. Selected human proteins with multiple cleavages by HERV-K(HML-2) protease. Table S3. Selected information from the Catalogue of Somatic Mutations in Cancer (COSMIC) for human genes for which encoded proteins were identified as substrates of HML-2 Pro. Table S4. Selected information from the Online Mendelian Inheritance in Man (OMIM) database for human genes for which encoded proteins were identified as substrates of HML-2 Pro. Table S5. Clone identifiers of cloned coding sequences of proteins investigated for processing by HERV-K(HML-2) Protease. (XLSX 1290 kb) [file 13100_2019_178_MOESM1_ESM.xlsx]

## Sheet: S1a_pH 5.5, rep1
Table S1a. Results of TAILS analysis at pH5.5, replicate 1.
Results shown were pre-filtered for cleavage events with greater than 2-fold (pH 5.5) or greater than 1.5-fold (pH 7) enrichment in HERV-K(HML-2) protease-treated Hela total cell lysate versus control. Chemically dimethylated cleavage sites are shown.
nonprime	prime	Id1	Id2	Id3	name	log2 (HML-2 / cntrl)	Position	Protein length	Alternate names	GO compartment	GO process	GO function
GTTESVQSVD	YYCDTIILR	P52756			RNA-binding protein 5;	10.99	226	815	Protein G15;Putative tumor suppressor LUCA15;RNA-binding motif protein 5;Renal carcinoma antigen NY-REN-9;	nucleoplasm; nucleus; spliceosomal complex;	apoptotic process; mRNA splicing, via spliceosome; negative regulation of cell proliferation; positive regulation of apoptotic process; regulation of alternative mRNA splicing, via spliceosome; RNA processing; spliceosomal complex assembly;	DNA binding; mRNA binding; RNA binding; zinc ion binding;
DQYLHRFAAY	FQQGDMESNGKYITKSGTR	P06744			Glucose-6-phosphate isomerase;	10.526	350	558	Autocrine motility factor;Neuroleukin;Phosphoglucose isomerase;Phosphohexose isomerase;Sperm antigen 36;	ciliary membrane; cytosol; extracellular exosome; extracellular region; extracellular space; ficolin-1-rich granule lumen; membrane; myelin sheath; neuron projection; nucleoplasm; plasma membrane; secretory granule lumen;	aldehyde catabolic process; angiogenesis; canonical glycolysis; carbohydrate metabolic process; erythrocyte homeostasis; gluconeogenesis; glucose 6-phosphate metabolic process; glucose homeostasis; hemostasis; humoral immune response; in utero embryonic development; learning or memory; mesoderm formation; methylglyoxal biosynthetic process; negative regulation of cysteine-type endopeptidase activ…	cytokine activity; glucose-6-phosphate isomerase activity; growth factor activity; intramolecular transferase activity; monosaccharide binding; ubiquitin protein ligase binding;
EVTITARFLY	GKKVEGTAFVIFGIQDGEQR	P01024			Complement C3;	9.883	260	1663	C3 and PZP-like alpha-2-macroglobulin domain-containing protein 1;	azurophil granule lumen; blood microparticle; extracellular exosome; extracellular region; extracellular space; plasma membrane; secretory granule lumen;	complement activation; complement activation, alternative pathway; complement activation, classical pathway; fatty acid metabolic process; G-protein coupled receptor signaling pathway; immune response; inflammatory response; neutrophil degranulation; positive regulation of activation of membrane attack complex; positive regulation of angiogenesis; positive regulation of apoptotic cell clearance; …	C5L2 anaphylatoxin chemotactic receptor binding; endopeptidase inhibitor activity; receptor binding; serine-type endopeptidase activity;
VDGRDLVIVA	ANLQKIVEEPQSNR	O95747			Serine/threonine-protein kinase OSR1;	9.876	482	527	Oxidative stress-responsive 1 protein;	cytoplasm; cytosol; extracellular exosome;	cellular hypotonic response; intracellular signal transduction; negative regulation of potassium ion transmembrane transporter activity; negative regulation of rubidium ion transmembrane transporter activity; peptidyl-threonine phosphorylation; protein phosphorylation; response to oxidative stress;	ATP binding; magnesium ion binding; protein serine/threonine kinase activity; signal transducer, downstream of receptor, with serine/threonine kinase activity;
EEWNEDLDGM	EGFVLEGKKFAR	Q13045			Protein flightless-1 homolog;	9.549	906	1269		brush border; cytosol; focal adhesion; microtubule organizing center; nucleoplasm;	actin cytoskeleton organization; actin filament severing; multicellular organism development; regulation of transcription, DNA-templated; transcription, DNA-templated;	actin binding;
DDDMSWKVRR	AAAKCLDAVVSTR	Q86VP6			Cullin-associated NEDD8-dissociated protein 1;	9.469	350	1230	Cullin-associated and neddylation-dissociated protein 1;TBP-interacting protein of 120 kDa A;p120 CAND1;	cullin-RING ubiquitin ligase complex; cytoplasm; cytosol; extracellular exosome; extracellular region; ficolin-1-rich granule lumen; Golgi apparatus; membrane; nucleoplasm; nucleus; secretory granule lumen; ubiquitin ligase complex;	cell differentiation; negative regulation of catalytic activity; neutrophil degranulation; positive regulation of RNA polymerase II transcriptional preinitiation complex assembly; protein ubiquitination; SCF complex assembly;	TBP-class protein binding;
LSAFQDMWIT	AAEFKEVGPNIVHQR	Q9BYD9			Actin-related protein T3;	9.469	354	372	Actin-related protein M1;	cytoplasm; cytoskeleton; male germ cell nucleus;
RCPRCSQAVY	AAEKVIGAGKSWHKACFR	P21291			Cysteine and glycine-rich protein 1;	9.469	126	193	Cysteine-rich protein 1;Epididymis luminal protein 141;	extracellular exosome; focal adhesion; nucleus;	platelet aggregation;	RNA binding; zinc ion binding;
NDLISIKDIF	AAKELENEENQEEQGLEEKGEEFAR	Q8IWE2			Protein NOXP20;	9.469	341	563	Nervous system overexpressed protein 20;Protein FAM114A1;	cytosol; Golgi apparatus; nucleoplasm; nucleus;
QFTQQGPRTR	AANAITKNNDLVR	Q9NYL9			Tropomodulin-3;	9.469	329	352	Ubiquitous tropomodulin;	cell-cell adherens junction; striated muscle thin filament;	actin cytoskeleton organization; erythrocyte development; pointed-end actin filament capping; positive regulation of mitotic cell cycle phase transition;	actin binding; cadherin binding involved in cell-cell adhesion; tropomyosin binding;
EVERLKKQLR	AAQLQHSEKMAQYLEEER	Q16204			Coiled-coil domain-containing protein 6;	9.469	276	474	Papillary thyroid carcinoma-encoded protein;Protein H4;	cytoskeleton; cytosol;		SH3 domain binding; structural constituent of cytoskeleton;
ALDSEQEMAM	AASSSSVEKSYELPDGQVITIGNER	Q9BYX7			Putative beta-actin-like protein 3;	9.469	228	375	Kappa-actin;POTE ankyrin domain family member K;	cytoskeleton; cytosol; extracellular exosome; extracellular region;	platelet degranulation;	ATP binding;
CGSDGVTYGS	ACELREAACLQQTQIEEAR	O00468			Agrin;	9.469	640	2067		basal lamina; cell junction; cytosol; extracellular exosome; extracellular matrix; extracellular region; Golgi lumen; integral component of membrane; lysosomal lumen; plasma membrane; synapse;	clustering of voltage-gated sodium channels; extracellular matrix organization; G-protein coupled acetylcholine receptor signaling pathway; glycosaminoglycan biosynthetic process; glycosaminoglycan catabolic process; glycosaminoglycan metabolic process; positive regulation of filopodium assembly; positive regulation of GTPase activity; positive regulation of synaptic growth at neuromuscular junct…	calcium ion binding; chondroitin sulfate binding; dystroglycan binding; heparan sulfate proteoglycan binding; laminin binding; sialic acid binding; structural constituent of cytoskeleton;
GFIIQLNWKK	ACQQAQVHANLKVNNVPR	Q96FL8			Multidrug and toxin extrusion protein 1;	9.469	463	570	Solute carrier family 47 member 1;	integral component of membrane; plasma membrane; vesicle;	organic cation transport; transmembrane transport;	drug; monovalent cation;
GDPRWIVEER	ADATNVNNWHWTER	O95433			Activator of 90 kDa heat shock protein ATPase homolog 1;	9.469	15	338	p38;	cytosol; endoplasmic reticulum; extracellular exosome;	response to stress;	ATPase activator activity; cadherin binding; chaperone binding;
ERCAQYKKDG	ADFAKWRCVLKIGEHTPSALAIMENANVLAR	P04075			Fructose-bisphosphate aldolase A;	9.469	141	364	Lung cancer antigen NY-LU-1;Muscle-type aldolase;	actin cytoskeleton; cytosol; extracellular exosome; extracellular region; extracellular space; ficolin-1-rich granule lumen; I band; M band; membrane; nucleus; platelet alpha granule lumen; secretory granule lumen; tertiary granule lumen;	actin filament organization; ATP biosynthetic process; canonical glycolysis; fructose 1,6-bisphosphate metabolic process; fructose metabolic process; gluconeogenesis; glycolytic process; muscle cell cellular homeostasis; neutrophil degranulation; platelet degranulation; protein homotetramerization; regulation of cell shape; striated muscle contraction;	actin binding; cadherin binding; cytoskeletal protein binding; fructose binding; fructose-bisphosphate aldolase activity; identical protein binding; RNA binding; tubulin binding;
TLTAAITKIL	AEGGGAKFKKYEEIDNAPEER	P49411			Elongation factor Tu, mitochondrial;	9.469	80	452	P43;	extracellular exosome; membrane; mitochondrial inner membrane; mitochondrial nucleoid; mitochondrion; myelin sheath;	response to ethanol; translational elongation;	GTP binding; GTPase activity; RNA binding; translation elongation factor activity;
TAQQNLALQL	AEKLGSLVENNER	B5ME19	Q99613		Eukaryotic translation initiation factor 3 subunit C-like protein;	9.469	858	913		eukaryotic translation initiation factor 3 complex;	translational initiation;	translation initiation factor activity; translation initiation factor binding;
CLSTIISPLF	AELKEKSQACGGNLGSIEELR	Q9Y6E0			Serine/threonine-protein kinase 24;	9.469	383	443	Mammalian STE20-like protein kinase 3;STE20-like kinase MST3;	cytoplasm; cytosol; extracellular exosome; membrane; nucleolus; nucleoplasm; nucleus;	execution phase of apoptosis; intrinsic apoptotic signaling pathway in response to oxidative stress; negative regulation of cell migration; protein autophosphorylation; protein phosphorylation; regulation of axon regeneration; response to hydrogen peroxide; signal transduction;	ATP binding; cadherin binding; metal ion binding; protein kinase activity; protein serine/threonine kinase activity; signal transducer, downstream of receptor, with serine/threonine kinase activity;
QFIQQMLQAL	AGVNPQLQNPEVR	Q9UMX0			Ubiquilin-1;	9.469	532	589	Protein linking IAP with cytoskeleton 1;	aggresome; autophagosome; cytoplasm; cytoplasmic vesicle; cytosol; endoplasmic reticulum; nucleoplasm; perinuclear region of cytoplasm; plasma membrane; proteasome complex; protein complex;	aggrephagy; autophagosome assembly; autophagosome maturation; cellular response to hypoxia; macroautophagy; negative regulation of store-operated calcium channel activity; negative regulation of toll-like receptor 3 signaling pathway; positive regulation of ER-associated ubiquitin-dependent protein catabolic process; positive regulation of protein ubiquitination; regulation of oxidative stress-in…	identical protein binding; kinase binding; polyubiquitin binding;
FEELNFFFQK	AIEGFNQSSHQKNVDAR	Q16222			UDP-N-acetylhexosamine pyrophosphorylase;	9.469	50	522	Antigen X;Sperm-associated antigen 2;	cytosol; nucleoplasm; plasma membrane;	UDP-N-acetylglucosamine biosynthetic process;	carbohydrate binding; identical protein binding; UDP-N-acetylglucosamine diphosphorylase activity;
RLLVPTQFVG	AIIGKEGATIR	Q9NZI8	O00425		Insulin-like growth factor 2 mRNA-binding protein 1;	9.469	207	579	Coding region determinant-binding protein;IGF-II mRNA-binding protein 1;VICKZ family member 1;Zipcode-binding protein 1;	axon; CRD-mediated mRNA stability complex; cytoplasm; cytoplasmic stress granule; cytosol; dendritic spine; filopodium; growth cone; intracellular ribonucleoprotein complex; lamellipodium; nucleoplasm; perinuclear region of cytoplasm;	CRD-mediated mRNA stabilization; gene expression; mRNA transport; negative regulation of translation; neuronal stem cell population maintenance; pallium cell proliferation in forebrain; regulation of cytokine biosynthetic process; regulation of mRNA stability involved in response to stress;	mRNA 3'-UTR binding; mRNA 5'-UTR binding; mRNA binding; RNA binding; translation regulator activity;
VKASFAPISF	AIKAKENDLLPLEKNR	Q12872			Splicing factor, suppressor of white-apricot homolog;	9.469	580	951	Splicing factor, arginine/serine-rich 8;Suppressor of white apricot protein homolog;	nucleus;	alternative mRNA splicing, via spliceosome; mRNA 5'-splice site recognition; negative regulation of mRNA splicing, via spliceosome; regulation of transcription, DNA-templated; transcription, DNA-templated;	RNA binding;
AGNLNTYKRL	AIKLPDDQIPKTNCNVAVINVGAPAAGMNAAVR	Q01813			ATP-dependent 6-phosphofructokinase, platelet type {ECO:0000255|HAMAP-Rule:MF_03184};	9.469	396	784	6-phosphofructokinase type C;Phosphofructo-1-kinase isozyme C;Phosphohexokinase {ECO:0000255|HAMAP-Rule:MF_03184};	cytoplasm; cytosol; extracellular exosome; extracellular matrix; membrane; nucleus;	canonical glycolysis; fructose 6-phosphate metabolic process;	6-phosphofructokinase activity; ATP binding; cadherin binding; metal ion binding; protein complex binding;
AAEGLGSHDR	AIKYLNQDYEALR	P17655			Calpain-2 catalytic subunit;	9.469	22	700	Calcium-activated neutral proteinase 2;Calpain M-type;Calpain large polypeptide L2;Calpain-2 large subunit;Millimolar-calpain;	chromatin; cortical actin cytoskeleton; cytoplasm; cytosol; dendrite; endoplasmic reticulum; extracellular exosome; focal adhesion; Golgi apparatus; lysosome; membrane raft; nucleus; perinuclear endoplasmic reticulum; plasma membrane; pseudopodium;	blastocyst development; cellular response to amino acid stimulus; extracellular matrix disassembly; myoblast fusion; protein autoprocessing; proteolysis; proteolysis involved in cellular protein catabolic process; regulation of cytoskeleton organization; response to hypoxia;	calcium ion binding; calcium-dependent cysteine-type endopeptidase activity; cysteine-type peptidase activity; cytoskeletal protein binding; protein heterodimerization activity;
MVNFTVDQIR	AIMDKKANIR	P13639			Elongation factor 2;	9.469	9	858		aggresome; cytoplasm; cytosol; extracellular exosome; extracellular matrix; extracellular region; ficolin-1-rich granule lumen; intracellular ribonucleoprotein complex; membrane; membrane raft; nucleus; plasma membrane; polysomal ribosome; secretory granule lumen;	aging; cellular response to brain-derived neurotrophic factor stimulus; glial cell proliferation; hematopoietic progenitor cell differentiation; neutrophil degranulation; peptidyl-diphthamide biosynthetic process from peptidyl-histidine; positive regulation of cytoplasmic translation; positive regulation of translation; protein methylation; response to drug; response to endoplasmic reticulum stre…	5S rRNA binding; actin filament binding; cadherin binding; GTP binding; GTPase activity; p53 binding; protein kinase binding; ribosome binding; RNA binding; translation elongation factor activity;
EAQKFALGIF	AINEAVESGDVGKTLSALR	P46940			Ras GTPase-activating-like protein IQGAP1;	9.469	627	1657	p195;	actin filament; axon; cytoplasm; cytoplasmic ribonucleoprotein granule; cytosol; extracellular exosome; extrinsic component of cytoplasmic side of plasma membrane; focal adhesion; growth cone; lateral plasma membrane; membrane raft; microtubule; midbody; neuron projection; nucleus; plasma membrane; protein complex; ruffle; secretory granule membrane; slit diaphragm;	cellular response to calcium ion; cellular response to epidermal growth factor stimulus; cellular response to platelet-derived growth factor stimulus; epidermal growth factor receptor signaling pathway; fibroblast growth factor receptor signaling pathway; glomerular visceral epithelial cell development; negative regulation of dephosphorylation; neuron projection extension; neutrophil degranulatio…	cadherin binding; calcium ion binding; calmodulin binding; GTPase activator activity; GTPase inhibitor activity; mitogen-activated protein kinase binding; phosphatidylinositol-3,4,5-trisphosphate binding; protein complex binding; protein domain specific binding; protein kinase binding; protein phosphatase binding; protein serine/threonine kinase activator activity; Rac GTPase binding; S100 protei…
QVIADYESGR	AIPNNQVLGKIER	O60869			Endothelial differentiation-related factor 1;	9.469	112	148	Multiprotein-bridging factor 1;	cytoplasm; cytosol; extracellular exosome; intracellular; nucleolus; nucleus;	endothelial cell differentiation; multicellular organism development; positive regulation of DNA binding; positive regulation of transcription, DNA-templated; regulation of lipid metabolic process; regulation of transcription, DNA-templated; transcription, DNA-templated;	calmodulin binding; RNA binding; sequence-specific DNA binding; transcription coactivator activity;
LPLKIEELAL	AKGITEECLKQPSLEQKEGR	Q9UKV3			Apoptotic chromatin condensation inducer in the nucleus;	9.469	537	1341		ASAP complex; cytosol; nuclear speck; nucleolus; nucleoplasm; nucleus; plasma membrane;	apoptotic chromosome condensation; erythrocyte differentiation; execution phase of apoptosis; mRNA processing; negative regulation of mRNA splicing, via spliceosome; positive regulation of apoptotic process; positive regulation of monocyte differentiation; RNA splicing;	ATPase activity; enzyme binding; nucleic acid binding; RNA binding;
SLRWDETPGR	AKGSETPGATPGSKIWDPTPSHTPAGAATPGR	O75533			Splicing factor 3B subunit 1;	9.469	237	1304	Pre-mRNA-splicing factor SF3b 155 kDa subunit;Spliceosome-associated protein 155;	catalytic step 2 spliceosome; nuclear speck; nucleoplasm; nucleus; spliceosomal complex; U11/U12 snRNP; U12-type spliceosomal complex; U2 snRNP; U2-type prespliceosome;	mRNA splicing, via spliceosome; positive regulation of gene expression, epigenetic; RNA splicing, via transesterification reactions; spliceosomal complex assembly;	mRNA binding; RNA binding;
SYIKEIEDLR	AKLLESEAVNENLR	Q7Z4S6			Kinesin-like protein KIF21A;	9.469	489	1674	Kinesin-like protein KIF2;Renal carcinoma antigen NY-REN-62;	cytoplasm; kinesin complex; microtubule;	microtubule-based movement;	ATP binding; ATPase activity; microtubule binding; microtubule motor activity;
DGVPSDSVEA	AKNASNTEKLTDQVMQNPR	Q99733			Nucleosome assembly protein 1-like 4;	9.469	16	375	Nucleosome assembly protein 2;	cytoplasm; nucleus;	nucleosome assembly;	RNA binding; unfolded protein binding;
KANKPGDVVR	AKNGKTIQVDNTDAEGR	P28838			Cytosol aminopeptidase;	9.469	350	519	Leucine aminopeptidase 3;Leucyl aminopeptidase;Peptidase S;Proline aminopeptidase;Prolyl aminopeptidase;	cytosol; extracellular exosome; focal adhesion; midbody; mitochondrion; nucleoplasm; nucleus; trans-Golgi network;	proteolysis;	aminopeptidase activity; manganese ion binding; metalloexopeptidase activity;
QVSLLALAGK	AKTKGLQSGVDIGVKYSEKQER	Q99439			Calponin-2;	9.469	129	309	Calponin H2, smooth muscle;Neutral calponin;	cell-cell junction; cytoskeleton; extracellular exosome; extracellular region; focal adhesion; membrane; specific granule lumen; stress fiber; tertiary granule lumen;	actomyosin structure organization; cellular response to mechanical stimulus; cytoskeleton organization; neutrophil degranulation; regulation of actin filament-based process;	actin binding; cadherin binding; calmodulin binding;
GLFNLRQIVL	AKVDQALHTQTDADPAEEYAR	P52888			Thimet oligopeptidase;	9.469	556	689	Endopeptidase 24.15;MP78;	mitochondrial intermembrane space;	peptide metabolic process;	metal ion binding; metalloendopeptidase activity; peptide binding;
DKFSADGMRL	ALADAGDTVEDANFVEAMADAGILR	Q9P2J5			Leucine--tRNA ligase, cytoplasmic;	9.469	740	1176	Leucyl-tRNA synthetase;	aminoacyl-tRNA synthetase multienzyme complex; cytoplasm; cytosol; endomembrane system; endoplasmic reticulum; lysosome; nuclear body;	cellular response to amino acid starvation; cellular response to amino acid stimulus; cellular response to leucine; cellular response to leucine starvation; leucyl-tRNA aminoacylation; negative regulation of autophagy; positive regulation of GTPase activity; positive regulation of TORC1 signaling; protein targeting to lysosome; regulation of cell size; tRNA aminoacylation for protein translation;…	aminoacyl-tRNA editing activity; ATP binding; GTPase activator activity; leucine-tRNA ligase activity; valine-tRNA ligase activity;
QRCLHATATR	ALPLIPIVVEQTGR	Q16740			ATP-dependent Clp protease proteolytic subunit, mitochondrial;	9.469	53	277	Endopeptidase Clp;	endopeptidase Clp complex; mitochondrial matrix; mitochondrion;	protein homooligomerization; proteolysis involved in cellular protein catabolic process;	identical protein binding; peptidase activity; serine-type endopeptidase activity;
VSQCLTESLC	ALVASQYGWSGNMER	P14625	Q58FF3		Endoplasmin;	9.469	283	399	94 kDa glucose-regulated protein;Heat shock protein 90 kDa beta member 1;Tumor rejection antigen 1;gp96 homolog;	cytosol; endocytic vesicle lumen; endoplasmic reticulum; endoplasmic reticulum chaperone complex; endoplasmic reticulum lumen; endoplasmic reticulum membrane; extracellular exosome; extracellular matrix; extracellular region; focal adhesion; melanosome; membrane; midbody; nucleus; perinuclear region of cytoplasm; plasma membrane;	actin rod assembly; ATF6-mediated unfolded protein response; cellular response to ATP; negative regulation of apoptotic process; protein folding in endoplasmic reticulum; protein transport; receptor-mediated endocytosis; regulation of phosphoprotein phosphatase activity; response to endoplasmic reticulum stress; response to hypoxia; retrograde protein transport, ER to cytosol; sequestering of cal…	ATP binding; calcium ion binding; low-density lipoprotein particle receptor binding; protein phosphatase binding; RNA binding; unfolded protein binding; virion binding;
MCDEDETT	ALVCDNGSGLVKAGFAGDDAPR	P68032	P68133		Actin, alpha cardiac muscle 1;	9.469	7	377	Alpha-cardiac actin;	actin filament; actomyosin, actin portion; blood microparticle; cell body; cytoplasm; cytosol; extracellular exosome; extracellular space; filopodium; focal adhesion; I band; lamellipodium; membrane; sarcomere;	actin filament-based movement; actin-myosin filament sliding; actomyosin structure organization; apoptotic process; cardiac muscle contraction; cardiac muscle tissue morphogenesis; cardiac myofibril assembly; heart contraction; mesenchyme migration; muscle filament sliding; negative regulation of apoptotic process; positive regulation of gene expression; response to drug; response to ethanol; ske…	ATP binding; ATPase activity; myosin binding;
MDDDIA	ALVVDNGSGMCKAGFAGDDAPR	P60709			Actin, cytoplasmic 1;	9.469	5	375	Beta-actin;	blood microparticle; cortical cytoskeleton; cytoplasm; cytoplasmic ribonucleoprotein granule; cytoskeleton; cytosol; dense body; extracellular exosome; extracellular space; focal adhesion; intracellular ribonucleoprotein complex; membrane; myelin sheath; NuA4 histone acetyltransferase complex; nuclear chromatin; nucleoplasm; plasma membrane; protein complex; vesicle;	ATP-dependent chromatin remodeling; cell junction assembly; ephrin receptor signaling pathway; Fc-gamma receptor signaling pathway involved in phagocytosis; membrane organization; movement of cell or subcellular component; platelet aggregation; positive regulation of gene expression, epigenetic; postsynaptic actin cytoskeleton organization; protein deubiquitination; retina homeostasis; substantia…	ATP binding; identical protein binding; kinesin binding; nitric-oxide synthase binding; structural constituent of cytoskeleton; structural constituent of postsynaptic actin cytoskeleton; Tat protein binding;
YVALDSEQEM	AMAASSSSVEKSYELPDGQVITIGNER	Q9BYX7			Putative beta-actin-like protein 3;	9.469	226	375	Kappa-actin;POTE ankyrin domain family member K;	cytoskeleton; cytosol; extracellular exosome; extracellular region;	platelet degranulation;	ATP binding;
DQEERIMEFS	APLPLENETEISESGMTVR	Q5SW79			Centrosomal protein of 170 kDa;	9.469	606	1584	KARP-1-binding protein;	centriole; centrosome; cytosol; microtubule; nuclear membrane; spindle;
TDIQEPMLSA	AQEQFGGNPFASLVSNTSSGEGSQPSR	Q9UMX0			Ubiquilin-1;	9.469	285	589	Protein linking IAP with cytoskeleton 1;	aggresome; autophagosome; cytoplasm; cytoplasmic vesicle; cytosol; endoplasmic reticulum; nucleoplasm; perinuclear region of cytoplasm; plasma membrane; proteasome complex; protein complex;	aggrephagy; autophagosome assembly; autophagosome maturation; cellular response to hypoxia; macroautophagy; negative regulation of store-operated calcium channel activity; negative regulation of toll-like receptor 3 signaling pathway; positive regulation of ER-associated ubiquitin-dependent protein catabolic process; positive regulation of protein ubiquitination; regulation of oxidative stress-in…	identical protein binding; kinase binding; polyubiquitin binding;
AADAELGQLR	AQGGSSDSSLALHER	Q08378			Golgin subfamily A member 3;	9.469	1027	1498	Golgi complex-associated protein of 170 kDa;Golgin-160;	cytosol; extrinsic component of Golgi membrane; Golgi apparatus; Golgi cisterna membrane; Golgi membrane; Golgi transport complex; membrane; nucleolus; nucleoplasm; nucleus;	intra-Golgi vesicle-mediated transport; spermatogenesis;	cadherin binding; transporter activity;
PLTQAALKVL	AQKASEAQPPVAR	Q13428			Treacle protein;	9.469	1079	1488	Treacher Collins syndrome protein;	cytosol; fibrillar center; nucleolus; nucleus;	neural crest cell development; neural crest formation; regulation of translation; skeletal system development;	protein heterodimerization activity; RNA binding; RNA polymerase I core binding; transporter activity;
SAVVRPKVHY	ARPSHPPPDPPILEGAVGGNEAR	Q14C86			GTPase-activating protein and VPS9 domain-containing protein 1;	9.469	846	1478	GAPex-5;Rab5-activating protein 6;	cytosol; endosome; membrane;	endocytosis; membrane organization; regulation of protein transport; signal transduction;	cadherin binding; GTPase activating protein binding; GTPase activator activity; guanyl-nucleotide exchange factor activity; Rab guanyl-nucleotide exchange factor activity;
EFPNENQVVF	ARVDCDQHSDIAQR	Q9BS26			Endoplasmic reticulum resident protein 44;	9.469	86	406	Thioredoxin domain-containing protein 4;	cell surface; endoplasmic reticulum lumen; endoplasmic reticulum membrane; endoplasmic reticulum-Golgi intermediate compartment; extracellular exosome; extracellular region; specific granule lumen;	cell redox homeostasis; glycoprotein metabolic process; neutrophil degranulation; protein folding; response to endoplasmic reticulum stress; response to unfolded protein;	protein disulfide isomerase activity;
ENVFGVCHIF	ASFNDTFVHVTDLSGKETICR	P62263			40S ribosomal protein S14;	9.469	33	151	Small ribosomal subunit protein uS11 {ECO:0000303|PubMed:24524803};	cytosol; cytosolic small ribosomal subunit; extracellular exosome; extracellular matrix; focal adhesion; membrane; mitochondrion; nucleolus; nucleoplasm;	erythrocyte differentiation; maturation of SSU-rRNA; maturation of SSU-rRNA from tricistronic rRNA transcript (SSU-rRNA, 5.8S rRNA, LSU-rRNA); negative regulation of transcription from RNA polymerase II promoter; nuclear-transcribed mRNA catabolic process, nonsense-mediated decay; ribosomal small subunit assembly; rRNA processing; SRP-dependent cotranslational protein targeting to membrane; trans…	mRNA 5'-UTR binding; RNA binding; small ribosomal subunit rRNA binding; structural constituent of ribosome; translation regulator activity;
TLTTRFIEAR	ASGKSPQPQLLSNKEKAEAR	Q15031			Probable leucine--tRNA ligase, mitochondrial;	9.469	705	903	Leucyl-tRNA synthetase;	mitochondrial matrix; mitochondrion;	leucyl-tRNA aminoacylation; mitochondrial translation; tRNA aminoacylation for protein translation;	aminoacyl-tRNA editing activity; ATP binding; leucine-tRNA ligase activity;
ETSNAKTSER	ASKKLPSQPTTDTSTDKER	Q8NFC6			Biorientation of chromosomes in cell division protein 1-like 1 {ECO:0000305};	9.469	231	3051		chromosome; nucleoplasm;	cellular response to DNA damage stimulus; DNA repair; replication fork processing;
VCREPLVYDL	ASLKAAPEPQQPMELYQPSAESLR	Q96BH1			E3 ubiquitin-protein ligase RNF25;	9.469	208	459	RING finger protein 25;RING-type E3 ubiquitin transferase RNF25 {ECO:0000305};	cytosol; nucleus;	positive regulation of NF-kappaB transcription factor activity; protein ubiquitination;	NF-kappaB binding; ubiquitin protein ligase activity; ubiquitin-protein transferase activity; zinc ion binding;
EATTLANGVL	ASLNLPAAIEDVSGDTVPQSILTKSR	Q8WUM4			Programmed cell death 6-interacting protein;	9.469	395	868	ALG-2-interacting protein 1;ALG-2-interacting protein X;Hp95;	actomyosin; bicellular tight junction; cytosol; endoplasmic reticulum exit site; extracellular exosome; extracellular vesicle; focal adhesion; immunological synapse; melanosome; membrane; microtubule organizing center; myelin sheath;	actomyosin contractile ring assembly; apoptotic process; bicellular tight junction assembly; cell separation after cytokinesis; maintenance of epithelial cell apical/basal polarity; multivesicular body assembly; positive regulation of exosomal secretion; positive regulation of extracellular exosome assembly; protein transport; regulation of centrosome duplication; regulation of extracellular exos…	calcium-dependent protein binding; protein homodimerization activity; proteinase activated receptor binding;
SWLVVQCLQR	ATPEQYQILKENYGQKEAEKVAR	P14324			Farnesyl pyrophosphate synthase;	9.469	342	419	(2E,6E)-farnesyl diphosphate synthase;Dimethylallyltranstransferase;Farnesyl diphosphate synthase;Geranyltranstransferase;	cytoplasm; cytosol; nucleoplasm;	cholesterol biosynthetic process; farnesyl diphosphate biosynthetic process; geranyl diphosphate biosynthetic process; viral process;	dimethylallyltranstransferase activity; geranyltranstransferase activity; metal ion binding; RNA binding;
RVLEFLRSLR	AVAPGLVR	Q9BSI4			TERF1-interacting nuclear factor 2;	9.469	41	451	TRF1-interacting nuclear protein 2;	chromosome, telomeric region; nuclear body; nuclear chromosome, telomeric region; nuclear matrix; nuclear telomere cap complex; nucleoplasm; perinucleolar chromocenter; shelterin complex;	negative regulation of epithelial cell proliferation; negative regulation of protein ADP-ribosylation; negative regulation of telomere maintenance via telomerase; protein localization to chromosome, telomeric region; regulation of telomere maintenance via telomere lengthening; telomere assembly; telomere capping;	telomeric DNA binding;
GANAILGVSL	AVCKAGAVEKGVPLYR	P06733			Alpha-enolase;	9.469	115	434	2-phospho-D-glycerate hydro-lyase;C-myc promoter-binding protein;Enolase 1;MBP-1;MPB-1;Non-neural enolase;Phosphopyruvate hydratase;Plasminogen-binding protein;	cell cortex region; cell surface; cytoplasm; cytosol; extracellular exosome; extracellular space; M band; membrane; nucleus; phosphopyruvate hydratase complex; plasma membrane;	canonical glycolysis; gluconeogenesis; negative regulation of cell growth; negative regulation of hypoxia-induced intrinsic apoptotic signaling pathway; negative regulation of transcription from RNA polymerase II promoter; negative regulation of transcription, DNA-templated; positive regulation of ATP biosynthetic process; positive regulation of muscle contraction; positive regulation of plasmino…	cadherin binding; DNA binding; GTPase binding; magnesium ion binding; phosphopyruvate hydratase activity; protein homodimerization activity; RNA binding; transcriptional repressor activity, RNA polymerase II core promoter proximal region sequence-specific binding;
ETGAGKHVPR	AVFVDLEPTVIDEIR	P68366			Tubulin alpha-4A chain;	9.469	63	448	Alpha-tubulin 1;Testis-specific alpha-tubulin;Tubulin H2-alpha;Tubulin alpha-1 chain;	cytosol; extracellular exosome; extracellular region; microtubule; microtubule cytoskeleton;	ciliary basal body docking; G2/M transition of mitotic cell cycle; microtubule-based process; platelet degranulation;	enzyme binding; GTP binding; GTPase activity; structural constituent of cytoskeleton;
TKLLSLSGVF	AVHKPKGPTSAELLNR	Q8WWH5			Probable tRNA pseudouridine synthase 1;	9.469	71	349			mRNA pseudouridine synthesis; tRNA modification;	pseudouridine synthase activity; RNA binding;
EASGGRYVPR	AVLVDLEPGTMDSVR	P68371	P04350	Q3ZCM7	Tubulin beta-4B chain;	9.469	61	444	Tubulin beta-2 chain;Tubulin beta-2C chain;	azurophil granule lumen; cytoskeleton; cytosol; extracellular exosome; extracellular matrix; extracellular region; extracellular vesicle; microtubule; microtubule cytoskeleton; myelin sheath; nucleus;	ciliary basal body docking; G2/M transition of mitotic cell cycle; microtubule-based process; movement of cell or subcellular component; natural killer cell mediated cytotoxicity; neutrophil degranulation;	double-stranded RNA binding; GTP binding; GTPase activity; MHC class I protein binding; structural constituent of cytoskeleton; unfolded protein binding;
NQGTLCTLEF	AVQMTCQSCVDAVR	O14618			Copper chaperone for superoxide dismutase;	9.469	15	274	Superoxide dismutase copper chaperone;	cytoplasm; cytosol; nucleus;	intracellular copper ion transport; positive regulation of oxidoreductase activity; removal of superoxide radicals; response to reactive oxygen species; superoxide metabolic process;	cadherin binding; copper ion binding; protein disulfide oxidoreductase activity; superoxide dismutase activity; zinc ion binding;
LKESLLRGIY	AYGFEKPSAIQQR	P38919	P60842	Q14240	Eukaryotic initiation factor 4A-III;	9.469	48	407	ATP-dependent RNA helicase DDX48;ATP-dependent RNA helicase eIF4A-3;DEAD box protein 48;Eukaryotic initiation factor 4A-like NUK-34;Eukaryotic translation initiation factor 4A isoform 3;Nuclear matrix protein 265;	catalytic step 2 spliceosome; cytoplasm; cytosol; dendrite; exon-exon junction complex; membrane; neuronal cell body; nuclear speck; nucleoplasm;	associative learning; cellular response to brain-derived neurotrophic factor stimulus; cellular response to selenite ion; embryonic cranial skeleton morphogenesis; exploration behavior; mRNA 3'-end processing; mRNA export from nucleus; mRNA splicing, via spliceosome; negative regulation of excitatory postsynaptic potential; negative regulation of selenocysteine incorporation; negative regulation …	ATP binding; ATP-dependent RNA helicase activity; mRNA binding; poly(A) binding; ribonucleoprotein complex binding; RNA binding; RNA stem-loop binding; selenocysteine insertion sequence binding;
SNEHIRELNR	AYKAEFKKTLEEAIR	P50995			Annexin A11;	9.469	311	505	56 kDa autoantigen;Annexin XI;Annexin-11;Calcyclin-associated annexin 50;	azurophil granule; cytoplasm; cytosol; extracellular exosome; melanosome; membrane; midbody; nuclear envelope; nucleoplasm; phagocytic vesicle; specific granule; spindle;	cytokinetic process; phagocytosis; response to calcium ion;	calcium ion binding; calcium-dependent phospholipid binding; calcium-dependent protein binding; MHC class II protein complex binding; phosphatidylethanolamine binding; RNA binding; S100 protein binding;
ENTKKVIQYL	AYVASSHKSKKDQGELER	P35579			Myosin-9;	9.469	190	1960	Cellular myosin heavy chain, type A;Myosin heavy chain 9;Myosin heavy chain, non-muscle IIa;Non-muscle myosin heavy chain A;Non-muscle myosin heavy chain IIa;	actin cytoskeleton; actomyosin; actomyosin contractile ring; brush border; cell leading edge; cell-cell adherens junction; cleavage furrow; cytoplasm; cytosol; extracellular exosome; extracellular matrix; focal adhesion; immunological synapse; membrane; myosin II complex; myosin II filament; neuromuscular junction; nucleus; plasma membrane; protein complex; ruffle; spindle; stress fiber; uropod;	actin cytoskeleton reorganization; actin filament-based movement; actomyosin structure organization; angiogenesis; blood vessel endothelial cell migration; cytokinetic process; establishment of meiotic spindle localization; establishment of T cell polarity; in utero embryonic development; integrin-mediated signaling pathway; leukocyte migration; meiotic spindle organization; membrane protein ecto…	actin binding; actin filament binding; actin-dependent ATPase activity; ADP binding; ATP binding; ATPase activity; cadherin binding; calmodulin binding; microfilament motor activity; motor activity; protein anchor; protein domain specific binding; protein homodimerization activity; RNA binding;
MTATEQWIFL	CAAHKTPKECPAIDYTR	Q9Y3A3			MOB-like protein phocein;	9.469	108	225	2C4D;Class II mMOB1;Mob1 homolog 3;Mps one binder kinase activator-like 3;Preimplantation protein 3;	cytoplasm; cytosol; dendritic spine; Golgi apparatus; Golgi cisterna membrane; neuronal cell body; perinuclear region of cytoplasm;	transport;	kinase binding; metal ion binding;
QGMEIKSNER	CCSFDGDADR	O95394			Phosphoacetylglucosamine mutase {ECO:0000305};	9.469	270	542	Acetylglucosamine phosphomutase {ECO:0000305};N-acetylglucosamine-phosphate mutase {ECO:0000303|PubMed:10721701};Phosphoglucomutase-3 {ECO:0000312|HGNC:HGNC:8907};	cytosol;	carbohydrate metabolic process; glucosamine metabolic process; glucose 1-phosphate metabolic process; hemopoiesis; protein N-linked glycosylation; protein O-linked glycosylation; spermatogenesis; UDP-N-acetylglucosamine biosynthetic process;	magnesium ion binding; phosphoacetylglucosamine mutase activity; phosphoglucomutase activity;
M	CDDEETTALVCDNGSGLVKAGFAGDDAPR	P68032			Actin, alpha cardiac muscle 1;	9.469	0	377	Alpha-cardiac actin;	actin filament; actomyosin, actin portion; blood microparticle; cell body; cytoplasm; cytosol; extracellular exosome; extracellular space; filopodium; focal adhesion; I band; lamellipodium; membrane; sarcomere;	actin filament-based movement; actin-myosin filament sliding; actomyosin structure organization; apoptotic process; cardiac muscle contraction; cardiac muscle tissue morphogenesis; cardiac myofibril assembly; heart contraction; mesenchyme migration; muscle filament sliding; negative regulation of apoptotic process; positive regulation of gene expression; response to drug; response to ethanol; ske…	ATP binding; ATPase activity; myosin binding;
CDEDETTALV	CDNGSGLVKAGFAGDDAPR	P68032	P68133		Actin, alpha cardiac muscle 1;	9.469	10	377	Alpha-cardiac actin;	actin filament; actomyosin, actin portion; blood microparticle; cell body; cytoplasm; cytosol; extracellular exosome; extracellular space; filopodium; focal adhesion; I band; lamellipodium; membrane; sarcomere;	actin filament-based movement; actin-myosin filament sliding; actomyosin structure organization; apoptotic process; cardiac muscle contraction; cardiac muscle tissue morphogenesis; cardiac myofibril assembly; heart contraction; mesenchyme migration; muscle filament sliding; negative regulation of apoptotic process; positive regulation of gene expression; response to drug; response to ethanol; ske…	ATP binding; ATPase activity; myosin binding;
M	CEEETTALVCDNGSGLCKAGFAGDDAPR	P63267			Actin, gamma-enteric smooth muscle;	9.469	0	376	Alpha-actin-3;Gamma-2-actin;Smooth muscle gamma-actin;	blood microparticle; cell body; cell periphery; cytoplasm; cytosol; extracellular exosome; extracellular space; filopodium; lamellipodium; myosin filament;	mesenchyme migration; muscle contraction; positive regulation of gene expression;	ATP binding;
NYGFPLDLLR	CESLLGLDPATCSR	Q658Y4			Protein FAM91A1;	9.469	477	838
RTFPVDCVAM	CGDCVEKEYPNR	Q8WUH1			Protein Churchill;	9.469	27	139			multicellular organism development; positive regulation of transcription, DNA-templated; transcription, DNA-templated;	zinc ion binding;
GKLRAIQTVS	CLLQGPCDAGNR	Q9H3U1			Protein unc-45 homolog A;	9.469	418	944	GCUNC-45;Smooth muscle cell-associated protein 1;	cytosol; Golgi apparatus; nuclear speck; perinuclear region of cytoplasm;	cell differentiation; chaperone-mediated protein folding; muscle organ development;	cadherin binding; Hsp90 protein binding;
MSLWVKQNNR	CPLCQQDWVVQR	Q9UBF6			RING-box protein 2;	9.469	97	113	CKII beta-binding protein 1;RING finger protein 7;Regulator of cullins 2;Sensitive to apoptosis gene protein;	Cul5-RING ubiquitin ligase complex; cytoplasm; cytosol; nucleoplasm; nucleus;	protein neddylation; protein ubiquitination; response to redox state;	copper ion binding; cullin family protein binding; NEDD8 transferase activity; zinc ion binding;
ERVALNTLAR	CSGIASAAAAAVEAAR	Q15274			Nicotinate-nucleotide pyrophosphorylase [carboxylating];	9.469	109	297	Quinolinate phosphoribosyltransferase [decarboxylating];	cytoplasm; cytosol; extracellular exosome;	NAD biosynthetic process; NAD metabolic process; protein oligomerization; quinolinate catabolic process;	nicotinate-nucleotide diphosphorylase (carboxylating) activity; protein homodimerization activity;
ETIANEYSDR	CTPACISFGPKNR	P34932			Heat shock 70 kDa protein 4;	9.469	32	840	HSP70RY;Heat shock 70-related protein APG-2;	cytosol; extracellular exosome;	chaperone-mediated protein complex assembly; protein import into mitochondrial outer membrane; response to unfolded protein;	ATP binding;
AYCHILLGNY	CVAVADAKKSLELNPNNSTAMLR	Q9Y2Z0			Protein SGT1 homolog {ECO:0000250|UniProtKB:Q08446};	9.469	60	365	Protein 40-6-3 {ECO:0000312|EMBL:CAC51433.1};Sgt1 {ECO:0000303|PubMed:10445024};Suppressor of G2 allele of SKP1 homolog {ECO:0000250|UniProtKB:Q08446};	cytosol; kinetochore; nucleus; protein complex; ubiquitin ligase complex;	mitotic nuclear division; positive regulation by host of symbiont catalytic activity; regulation of protein stability;
VFSHAQTVVL	CVGCSTVLCQPTGGKAR	P42677	Q71UM5		40S ribosomal protein S27;	9.469	54	84	Metallopan-stimulin 1;Small ribosomal subunit protein eS27 {ECO:0000303|PubMed:24524803};	cytosol; cytosolic small ribosomal subunit; nucleoplasm; nucleus; ribosome;	cell proliferation; nuclear-transcribed mRNA catabolic process, nonsense-mediated decay; ribosomal small subunit assembly; rRNA processing; sister chromatid cohesion; SRP-dependent cotranslational protein targeting to membrane; translation; translational initiation; viral transcription;	DNA binding; RNA binding; structural constituent of ribosome; zinc ion binding;
LDQAVLDLQR	CVSLEPKNKVFQEALR	Q9H3U1			Protein unc-45 homolog A;	9.469	116	944	GCUNC-45;Smooth muscle cell-associated protein 1;	cytosol; Golgi apparatus; nuclear speck; perinuclear region of cytoplasm;	cell differentiation; chaperone-mediated protein folding; muscle organ development;	cadherin binding; Hsp90 protein binding;
GVEKNVMVVS	CVYPSSEKNNSNSLNR	Q9NY27			Serine/threonine-protein phosphatase 4 regulatory subunit 2;	9.469	132	417		centrosome; cytoplasm; nucleoplasm; nucleus; protein phosphatase 4 complex;	cellular protein modification process; mRNA processing; regulation of double-strand break repair via homologous recombination; RNA splicing;	protein binding, bridging; protein phosphatase regulator activity;
ASGTTLLEAL	DCILPPTRPTDKPLR	P68104	Q5VTE0		Elongation factor 1-alpha 1;	9.469	231	462	Elongation factor Tu;Eukaryotic elongation factor 1 A-1;Leukocyte receptor cluster member 7;	cortical actin cytoskeleton; cytoplasm; cytoplasmic side of lysosomal membrane; cytosol; eukaryotic translation elongation factor 1 complex; extracellular exosome; extracellular region; extracellular space; ficolin-1-rich granule lumen; membrane; myelin sheath; nucleolus; nucleus; ruffle membrane; secretory granule lumen;	cellular response to epidermal growth factor stimulus; neutrophil degranulation; protein methylation; regulation of chaperone-mediated autophagy; regulation of transcription, DNA-templated; transcription, DNA-templated; translational elongation;	GTP binding; GTPase activity; protein kinase binding; RNA binding; translation elongation factor activity; tRNA binding;
DVIRNAFACF	DEEASGFIHEDHLR	P24844			Myosin regulatory light polypeptide 9;	9.469	109	172	20 kDa myosin light chain;MLC-2C;Myosin RLC;Myosin regulatory light chain 2, smooth muscle isoform;Myosin regulatory light chain 9;Myosin regulatory light chain MRLC1;	cytosol; muscle myosin complex; stress fiber; Z disc;	muscle contraction; platelet aggregation; regulation of muscle contraction;	calcium ion binding; myosin heavy chain binding; structural constituent of muscle;
AIEHTLQWAR	DEFEGLFKQPAENVNQYLTDPKFVER	P22314			Ubiquitin-like modifier-activating enzyme 1;	9.469	648	1058	Protein A1S9;Ubiquitin-activating enzyme E1;	cytoplasm; cytosol; extracellular exosome; mitochondrion; nucleoplasm; nucleus;	cellular response to DNA damage stimulus; protein ubiquitination;	ATP binding; RNA binding; ubiquitin activating enzyme activity;
TYVQPRRKQR	DEQLLTNVLETLR	Q9P2I0			Cleavage and polyadenylation specificity factor subunit 2;	9.469	214	782	Cleavage and polyadenylation specificity factor 100 kDa subunit;	membrane; mRNA cleavage and polyadenylation specificity factor complex; nucleoplasm;	mRNA 3'-end processing; mRNA 3'-end processing by stem-loop binding and cleavage; mRNA cleavage; mRNA export from nucleus; mRNA polyadenylation; mRNA splicing, via spliceosome; termination of RNA polymerase II transcription;	RNA binding;
KGKKKAVEQR	DFIGVDSTGKR	Q9NR50			Translation initiation factor eIF-2B subunit gamma;	9.469	154	452	eIF-2B GDP-GTP exchange factor subunit gamma;	cytoplasm; cytosol; eukaryotic translation initiation factor 2B complex;	cellular response to stimulus; hippocampus development; negative regulation of translational initiation in response to stress; oligodendrocyte development; response to glucose; response to heat; response to peptide hormone; translational initiation;	guanyl-nucleotide exchange factor activity; nucleotidyltransferase activity; translation initiation factor activity;
VKGKRVVMRV	DFNVPMKNNQITNNQR	P00558			Phosphoglycerate kinase 1;	9.469	22	417	Cell migration-inducing gene 10 protein;Primer recognition protein 2;	cytosol; extracellular exosome; extracellular space; membrane; membrane raft;	canonical glycolysis; cellular response to hypoxia; epithelial cell differentiation; gluconeogenesis; glycolytic process; negative regulation of angiogenesis; phosphorylation; plasminogen activation;	ATP binding; phosphoglycerate kinase activity; protein-disulfide reductase activity;
DWLTEKMHAR	DFTVSAMHGDMDQKER	P60842			Eukaryotic initiation factor 4A-I;	9.469	294	406	ATP-dependent RNA helicase eIF4A-1;	cytoplasm; cytosol; eukaryotic translation initiation factor 4F complex; extracellular exosome; extracellular matrix; membrane;	nuclear-transcribed mRNA poly(A) tail shortening; regulation of gene expression; RNA secondary structure unwinding; translational initiation; viral process;	ATP binding; ATP-dependent RNA helicase activity; double-stranded RNA binding; helicase activity; mRNA binding; RNA binding; RNA cap binding; translation factor activity, RNA binding; translation initiation factor activity;
FEVGDIMLIR	DHINLPGFSGQNPLR	P00491			Purine nucleoside phosphorylase;	9.469	132	289	Inosine phosphorylase;Inosine-guanosine phosphorylase;	cytoplasm; cytoskeleton; cytosol; extracellular exosome; extracellular region; ficolin-1-rich granule lumen; intracellular; nucleus; secretory granule lumen;	immune response; inosine catabolic process; interleukin-2 secretion; NAD biosynthesis via nicotinamide riboside salvage pathway; neutrophil degranulation; nicotinamide riboside catabolic process; nucleobase-containing compound metabolic process; positive regulation of alpha-beta T cell differentiation; positive regulation of T cell proliferation; purine nucleotide catabolic process; purine-contai…	drug binding; nucleoside binding; phosphate ion binding; purine nucleobase binding; purine-nucleoside phosphorylase activity;
ESSMCQSNSR	DHLSDKESKESSVEGAENQR	Q9Y6Q9			Nuclear receptor coactivator 3;	9.469	589	1424	ACTR;Amplified in breast cancer 1 protein;CBP-interacting protein;Class E basic helix-loop-helix protein 42;Receptor-associated coactivator 3;Steroid receptor coactivator protein 3;Thyroid hormone receptor activator molecule 1;	cytoplasm; cytosol; extracellular exosome; nuclear chromatin; nucleoplasm; nucleus; protein complex;	androgen receptor signaling pathway; cellular response to estradiol stimulus; cellular response to hormone stimulus; intracellular receptor signaling pathway; positive regulation of gene expression; positive regulation of keratinocyte differentiation; positive regulation of transcription from RNA polymerase II promoter; positive regulation of transcription, DNA-templated; receptor transactivation…	androgen receptor binding; disordered domain specific binding; histone acetyltransferase activity; ligand-dependent nuclear receptor binding; ligand-dependent nuclear receptor transcription coactivator activity; nuclear hormone receptor binding; protein heterodimerization activity; protein N-terminus binding; thyroid hormone receptor binding; transcription coactivator activity;
FILKARSTVR	DIDPQNDLTFLR	Q8TF09	Q9NP97		Dynein light chain roadblock-type 2;	9.469	57	96	Dynein light chain 2B, cytoplasmic;Roadblock domain-containing protein 2;	ciliary tip; cilium; cytoplasm; cytoplasmic dynein complex; dynein complex; extracellular exosome; microtubule;	intraciliary transport involved in cilium assembly; microtubule-based movement;	dynein intermediate chain binding; microtubule motor activity;
DIATQLISNM	DIDVILGGGR	P09923	P10696	P05187	Intestinal-type alkaline phosphatase;	9.469	215	535		anchored component of membrane; extracellular region; integral component of membrane; plasma membrane;	C-terminal protein lipidation; dephosphorylation; digestion; phosphatidic acid biosynthetic process;	alkaline phosphatase activity; magnesium ion binding; protease binding; zinc ion binding;
FNEYQRMTGR	DIEKSICR	P50995			Annexin A11;	9.469	403	505	56 kDa autoantigen;Annexin XI;Annexin-11;Calcyclin-associated annexin 50;	azurophil granule; cytoplasm; cytosol; extracellular exosome; melanosome; membrane; midbody; nuclear envelope; nucleoplasm; phagocytic vesicle; specific granule; spindle;	cytokinetic process; phagocytosis; response to calcium ion;	calcium ion binding; calcium-dependent phospholipid binding; calcium-dependent protein binding; MHC class II protein complex binding; phosphatidylethanolamine binding; RNA binding; S100 protein binding;
AFHQRISFCL	DIHNMSVKAMR	O43242			26S proteasome non-ATPase regulatory subunit 3;	9.469	483	534	26S proteasome regulatory subunit RPN3;26S proteasome regulatory subunit S3;Proteasome subunit p58;	cytosol; extracellular exosome; extracellular region; ficolin-1-rich granule lumen; membrane; nucleoplasm; nucleus; proteasome accessory complex; proteasome complex; proteasome regulatory particle, lid subcomplex; secretory granule lumen;	anaphase-promoting complex-dependent catabolic process; antigen processing and presentation of exogenous peptide antigen via MHC class I, TAP-dependent; Fc-epsilon receptor signaling pathway; MAPK cascade; negative regulation of canonical Wnt signaling pathway; negative regulation of G2/M transition of mitotic cell cycle; negative regulation of ubiquitin-protein ligase activity involved in mitoti…	enzyme regulator activity;
RVGQAKNDKG	DIIVTTKSGGR	Q96KP1			Exocyst complex component 2;	9.469	71	924	Exocyst complex component Sec5;	cytosol; exocyst; membrane; plasma membrane;	exocyst assembly; Golgi to plasma membrane transport; protein transport; regulation of entry of bacterium into host cell;	protein kinase binding; protein N-terminus binding; Ral GTPase binding;
EEVGVEHLLR	DIKDTTVGTLSQR	P51665			26S proteasome non-ATPase regulatory subunit 7;	9.469	176	324	26S proteasome regulatory subunit RPN8;26S proteasome regulatory subunit S12;Mov34 protein homolog;Proteasome subunit p40;	cytosol; extracellular exosome; extracellular region; ficolin-1-rich granule lumen; membrane; nucleoplasm; nucleus; proteasome complex; proteasome regulatory particle; secretory granule lumen;	anaphase-promoting complex-dependent catabolic process; antigen processing and presentation of exogenous peptide antigen via MHC class I, TAP-dependent; Fc-epsilon receptor signaling pathway; MAPK cascade; negative regulation of canonical Wnt signaling pathway; negative regulation of G2/M transition of mitotic cell cycle; negative regulation of ubiquitin-protein ligase activity involved in mitoti…	protein homodimerization activity;
KTSILVFKDR	DKYVSGEFR	Q9BRS2			Serine/threonine-protein kinase RIO1;	9.469	219	568	RIO kinase 1;	cytosol; nucleoplasm; preribosome, small subunit precursor;	maturation of SSU-rRNA; positive regulation of rRNA processing; ribosomal small subunit biogenesis; rRNA processing;	ATP binding; hydrolase activity; metal ion binding; protein serine/threonine kinase activity;
AIAALNSCLR	DLDQASLAAVSQQLAPR	Q9Y490			Talin-1;	9.469	1672	2541		cell surface; cell-cell junction; cytoskeleton; cytosol; extracellular exosome; extracellular region; focal adhesion; ruffle; ruffle membrane;	cell-cell junction assembly; cell-substrate junction assembly; cortical actin cytoskeleton organization; cytoskeletal anchoring at plasma membrane; integrin activation; integrin-mediated signaling pathway; IRE1-mediated unfolded protein response; movement of cell or subcellular component; muscle contraction; platelet aggregation; platelet degranulation; viral process;	actin filament binding; cadherin binding; integrin binding; LIM domain binding; phosphatidylinositol binding; phosphatidylserine binding; structural constituent of cytoskeleton; vinculin binding;
SQPQKGRKPR	DLELPLSPSLLGGPGPER	P19419			ETS domain-containing protein Elk-1;	9.469	316	428		axon terminus; dendrite; mitochondrion; neuronal cell body; nucleoplasm; nucleus;	cell differentiation; cellular response to gamma radiation; cellular response to testosterone stimulus; positive regulation of neuron death; positive regulation of transcription from RNA polymerase II promoter; positive regulation of transcription, DNA-templated; response to fibroblast growth factor; response to light stimulus;	chromatin binding; core promoter binding; RNA polymerase II core promoter proximal region sequence-specific DNA binding; RNA polymerase II transcription factor binding; transcription factor activity, sequence-specific DNA binding; transcriptional activator activity, RNA polymerase II core promoter proximal region sequence-specific binding;
SHPDLLQLPR	DLEQPSQAAGINLEIIR	Q27J81			Inverted formin-2;	9.469	819	1249	HBEBP2-binding protein C;	perinuclear region of cytoplasm;	actin cytoskeleton organization; regulation of mitochondrial fission;	actin binding; Rho GTPase binding;
LEEQILRTGR	DLFSLDSEDPSPASPPLR	Q9BTK6			PAXIP1-associated glutamate-rich protein 1;	9.469	222	254	Glutamate-rich coactivator interacting with SRC1 {ECO:0000303|PubMed:19039327};PAXIP1-associated protein 1;PTIP-associated protein 1;	histone methyltransferase complex; MLL3/4 complex; nucleus;	DNA recombination; DNA repair; positive regulation of cell cycle G1/S phase transition; positive regulation of intracellular estrogen receptor signaling pathway; positive regulation of transcription from RNA polymerase II promoter; transcription, DNA-templated;	estrogen receptor binding;
MSQTR	DLQGGKAFGLLKAQQEER	P55008			Allograft inflammatory factor 1;	9.469	4	147	Ionized calcium-binding adapter molecule 1;Protein G1;	actin filament; cytoplasm; cytosol; lamellipodium; nucleus; perikaryon; perinuclear region of cytoplasm; phagocytic cup; ruffle membrane;	actin filament bundle assembly; actin filament polymerization; cellular response to extracellular stimulus; cellular response to hormone stimulus; cellular response to hydroperoxide; cellular response to interferon-gamma; cellular response to morphine; inflammatory response; microglial cell activation; negative regulation of apoptotic process; negative regulation of gene expression; negative regu…	actin filament binding; calcium ion binding;
AILRLDLAGR	DLTDYLMKILTER	P60709	Q562R1	P68032	Actin, cytoplasmic 1;	9.469	182	375	Beta-actin;	blood microparticle; cortical cytoskeleton; cytoplasm; cytoplasmic ribonucleoprotein granule; cytoskeleton; cytosol; dense body; extracellular exosome; extracellular space; focal adhesion; intracellular ribonucleoprotein complex; membrane; myelin sheath; NuA4 histone acetyltransferase complex; nuclear chromatin; nucleoplasm; plasma membrane; protein complex; vesicle;	ATP-dependent chromatin remodeling; cell junction assembly; ephrin receptor signaling pathway; Fc-gamma receptor signaling pathway involved in phagocytosis; membrane organization; movement of cell or subcellular component; platelet aggregation; positive regulation of gene expression, epigenetic; postsynaptic actin cytoskeleton organization; protein deubiquitination; retina homeostasis; substantia…	ATP binding; identical protein binding; kinesin binding; nitric-oxide synthase binding; structural constituent of cytoskeleton; structural constituent of postsynaptic actin cytoskeleton; Tat protein binding;
KPKLARATVR	DPKTGVLTVASYR	O15460			Prolyl 4-hydroxylase subunit alpha-2;	9.469	366	535	Procollagen-proline,2-oxoglutarate-4-dioxygenase subunit alpha-2;	cytosol; endoplasmic reticulum; endoplasmic reticulum lumen; intracellular membrane-bounded organelle; nucleoplasm;		electron carrier activity; iron ion binding; L-ascorbic acid binding; oxidoreductase activity, acting on single donors with incorporation of molecular oxygen, incorporation of two atoms of oxygen; procollagen-proline 4-dioxygenase activity;
LLEEICNLGR	DPKYICQKPSIQKADGTATAPPPR	Q7Z6Z7			E3 ubiquitin-protein ligase HUWE1;	9.469	692	4374	ARF-binding protein 1;HECT, UBA and WWE domain-containing protein 1;HECT-type E3 ubiquitin transferase HUWE1;Homologous to E6AP carboxyl terminus homologous protein 9;Large structure of UREB1;Mcl-1 ubiquitin ligase E3;Upstream regulatory element-binding protein 1;	cytoplasm; cytosol; extracellular exosome; extracellular region; ficolin-1-rich granule lumen; membrane; nucleoplasm; nucleus; secretory granule lumen;	base-excision repair; cell differentiation; histone ubiquitination; neutrophil degranulation; positive regulation of protein targeting to mitochondrion; protein monoubiquitination; protein polyubiquitination;	DNA binding; RNA binding; ubiquitin-protein transferase activity;
GLLNACLRSR	DPSLMVDFILAK	O15360			Fanconi anemia group A protein;	9.469	1145	1455		cytoplasm; Fanconi anaemia nuclear complex; nucleoplasm; nucleus;	DNA repair; female gonad development; interstrand cross-link repair; male gonad development; male meiosis; protein complex assembly; regulation of CD40 signaling pathway; regulation of cell proliferation; regulation of inflammatory response; regulation of regulatory T cell differentiation; regulation of sequence-specific DNA binding transcription factor activity;
WLQSVRILSR	DRNCLDPFTSR	Q9NPQ8			Synembryn-A;	9.469	74	531	Protein Ric-8A;	cytoplasm; plasma membrane;	adenylate cyclase-inhibiting G-protein coupled receptor signaling pathway; basement membrane organization; cell migration involved in gastrulation; cell-cell adhesion involved in gastrulation; G-protein coupled receptor signaling pathway; in utero embryonic development; vasculature development; visual learning;	G-protein alpha-subunit binding; GTPase activator activity; guanyl-nucleotide exchange factor activity;
TPSQIGVILR	DSHGVAQVR	P62277			40S ribosomal protein S13;	9.469	54	151	Small ribosomal subunit protein uS15 {ECO:0000303|PubMed:24524803};	cytosol; cytosolic small ribosomal subunit; extracellular exosome; extracellular matrix; focal adhesion; membrane; nucleolus; nucleoplasm; nucleus; ribosome;	negative regulation of RNA splicing; nuclear-transcribed mRNA catabolic process, nonsense-mediated decay; rRNA processing; SRP-dependent cotranslational protein targeting to membrane; translation; translational initiation; viral transcription;	5.8S rRNA binding; mRNA 5'-UTR binding; mRNA binding; RNA binding; small ribosomal subunit rRNA binding; structural constituent of ribosome;
RQQLPVFKHR	DSIVETLKR	Q7Z478			ATP-dependent RNA helicase DHX29 {ECO:0000255|HAMAP-Rule:MF_03068};	9.469	577	1369	DEAH box protein 29 {ECO:0000255|HAMAP-Rule:MF_03068};Nucleic acid helicase DDXx;	eukaryotic 43S preinitiation complex; mitochondrion;	RNA processing;	ATP binding; ATP-dependent RNA helicase activity; cadherin binding; ribosomal small subunit binding; RNA binding; translation initiation factor activity;
GQRHGMFLVR	DSSTCPGDYVLSVSENSR	P46109			Crk-like protein;	9.469	38	303		cytosol; endosome; extracellular exosome;	activation of MAPKK activity; animal organ morphogenesis; anterior/posterior pattern specification; blood vessel development; heart development; intracellular signal transduction; JNK cascade; parathyroid gland development; positive regulation of cell proliferation; positive regulation of substrate adhesion-dependent cell spreading; Ras protein signal transduction; thymus development;	cadherin binding; phosphotyrosine binding; RNA binding; SH3/SH2 adaptor activity; signal transducer activity;
KQLIVGVNKM	DSTEPPYSQKR	P68104	Q5VTE0		Elongation factor 1-alpha 1;	9.469	154	462	Elongation factor Tu;Eukaryotic elongation factor 1 A-1;Leukocyte receptor cluster member 7;	cortical actin cytoskeleton; cytoplasm; cytoplasmic side of lysosomal membrane; cytosol; eukaryotic translation elongation factor 1 complex; extracellular exosome; extracellular region; extracellular space; ficolin-1-rich granule lumen; membrane; myelin sheath; nucleolus; nucleus; ruffle membrane; secretory granule lumen;	cellular response to epidermal growth factor stimulus; neutrophil degranulation; protein methylation; regulation of chaperone-mediated autophagy; regulation of transcription, DNA-templated; transcription, DNA-templated; translational elongation;	GTP binding; GTPase activity; protein kinase binding; RNA binding; translation elongation factor activity; tRNA binding;
IAHTQQRHIR	DSVSAAWDTYDTDRDGR	Q96D15			Reticulocalbin-3;	9.469	114	328	EF-hand calcium-binding protein RLP49;	endoplasmic reticulum lumen;		calcium ion binding;
SVFHATAFEL	DTDGNPFDQDIYGR	P50454			Serpin H1;	9.469	358	418	47 kDa heat shock protein;Arsenic-transactivated protein 3;Cell proliferation-inducing gene 14 protein;Collagen-binding protein;Rheumatoid arthritis-related antigen RA-A47;	endoplasmic reticulum; endoplasmic reticulum lumen; endoplasmic reticulum-Golgi intermediate compartment; extracellular exosome; membrane raft;	chondrocyte development involved in endochondral bone morphogenesis; collagen biosynthetic process; collagen fibril organization; protein maturation; response to unfolded protein;	collagen binding; RNA binding; serine-type endopeptidase inhibitor activity; unfolded protein binding;
RFSRGGMISF	DVFPEGWDKR	Q92871			Phosphomannomutase 1;	9.469	188	262	PMMH-22;	cytosol; neuronal cell body;	GDP-mannose biosynthetic process; mannose metabolic process; protein N-linked glycosylation; protein targeting to ER;	metal ion binding; phosphomannomutase activity;
DGKEAMLKHR	DYETATLSDIKALIR	O43707			Alpha-actinin-4 {ECO:0000305};	9.469	438	911	Non-muscle alpha-actinin 4 {ECO:0000303|PubMed:10656685};	brush border; cell-cell junction; cortical cytoskeleton; cytoplasm; cytosol; extracellular exosome; extracellular region; extracellular space; focal adhesion; intracellular; intracellular ribonucleoprotein complex; neuron projection; nuclear body; nucleus; perinuclear region of cytoplasm; platelet alpha granule lumen; protein complex; pseudopodium; stress fiber; Z disc;	actin filament bundle assembly; bicellular tight junction assembly; negative regulation of cellular component movement; negative regulation of substrate adhesion-dependent cell spreading; peroxisome proliferator activated receptor signaling pathway; platelet degranulation; positive regulation of cell migration; positive regulation of cellular component movement; positive regulation of NIK/NF-kapp…	actin binding; actin filament binding; calcium ion binding; chromatin DNA binding; integrin binding; ion channel binding; ligand-dependent nuclear receptor transcription coactivator activity; nuclear hormone receptor binding; nucleoside binding; protein homodimerization activity; protein N-terminus binding; retinoic acid receptor binding; RNA binding; RNA polymerase II regulatory region sequence-…
LQGVAFPISR	EAFQALEKLNNR	Q12792			Twinfilin-1;	9.469	183	350	Protein A6;Protein tyrosine kinase 9;	actin cytoskeleton; cell-cell junction; cytosol; filopodium; focal adhesion; myofibril; perinuclear region of cytoplasm; ruffle membrane;	barbed-end actin filament capping; negative regulation of actin filament polymerization; positive regulation of cardiac muscle hypertrophy; regulation of actin phosphorylation; sequestering of actin monomers;	actin monomer binding; ATP binding; cadherin binding; phosphatidylinositol-4,5-bisphosphate binding; protein complex binding;
GTLSTLEFQR	EAIENATTNAEVLR	Q9BY43			Charged multivesicular body protein 4a;	9.469	89	222	Chromatin-modifying protein 4a;SNF7 homolog associated with Alix-2;SNF7-1;Vacuolar protein sorting-associated protein 32-1;	cytoplasm; cytoplasmic side of plasma membrane; cytoplasmic vesicle membrane; cytosol; ESCRT III complex; extracellular exosome; late endosome membrane; membrane coat; midbody; nucleus;	cell separation after cytokinesis; endosomal transport; macroautophagy; membrane budding; membrane invagination; mitotic metaphase plate congression; multivesicular body assembly; negative regulation of autophagosome assembly; negative regulation of neuron death; nucleus organization; plasma membrane tubulation; posttranslational protein targeting to membrane; protein homooligomerization; protein…	ATPase binding; identical protein binding; lipid binding; protein homodimerization activity;
QAVLGVLLRR	EAPEELLAYEGVR	Q12788			Transducin beta-like protein 3;	9.469	740	808	WD repeat-containing protein SAZD;	nucleolus; nucleoplasm; nucleus; Pwp2p-containing subcomplex of 90S preribosome; small-subunit processome;	maturation of SSU-rRNA from tricistronic rRNA transcript (SSU-rRNA, 5.8S rRNA, LSU-rRNA); rRNA processing;	RNA binding; snoRNA binding;
EIEEAMKRVR	EAQSLISAAIEPDKKEEKR	Q05519			Serine/arginine-rich splicing factor 11;	9.469	226	484	Arginine-rich 54 kDa nuclear protein;Splicing factor, arginine/serine-rich 11;	nuclear speck; nucleoplasm; nucleus;	mRNA 3'-end processing; mRNA export from nucleus; mRNA processing; mRNA splicing, via spliceosome; RNA export from nucleus; RNA splicing; termination of RNA polymerase II transcription;	RNA binding;
MAELQQLRVQ	EAVESMVKSLER	Q96C01			Protein FAM136A;	9.469	9	138		cytoplasm;
ITAAYVEMRR	EAWASKDATYTSAR	P33993			DNA replication licensing factor MCM7;	9.469	589	719	CDC47 homolog;P1.1-MCM3;	chromatin; cytosol; MCM complex; membrane; nuclear chromosome, telomeric region; nucleoplasm;	cell proliferation; cellular response to DNA damage stimulus; cellular response to epidermal growth factor stimulus; cellular response to xenobiotic stimulus; DNA replication; DNA replication initiation; DNA unwinding involved in DNA replication; G1/S transition of mitotic cell cycle; regulation of phosphorylation; response to drug;	ATP binding; DNA helicase activity; single-stranded DNA binding;
QTHGFVHRKR	EDCSPADKPYIDEAR	Q96DG6			Carboxymethylenebutenolidase homolog;	9.469	218	245		cytosol; extracellular exosome;	xenobiotic metabolic process;	hydrolase activity;
CFLEEIMTKR	EDLVVAPAGITLKEANEILQR	P12268			Inosine-5'-monophosphate dehydrogenase 2 {ECO:0000255|HAMAP-Rule:MF_03156};	9.469	181	514	IMPDH-II;	cytoplasm; cytosol; extracellular exosome; extracellular region; ficolin-1-rich granule lumen; membrane; nucleus; peroxisomal membrane; secretory granule lumen;	cellular response to interleukin-4; GMP biosynthetic process; GTP biosynthetic process; lymphocyte proliferation; neutrophil degranulation; protein homotetramerization; purine ribonucleoside monophosphate biosynthetic process; retina development in camera-type eye;	DNA binding; IMP dehydrogenase activity; metal ion binding; nucleotide binding; RNA binding;
GRKKGAKLTP	EEEEILNKKR	P62241			40S ribosomal protein S8;	9.469	130	208	Small ribosomal subunit protein eS8 {ECO:0000303|PubMed:24524803};	cytosol; cytosolic small ribosomal subunit; endoplasmic reticulum; extracellular exosome; focal adhesion; intracellular ribonucleoprotein complex; membrane; nucleoplasm; nucleus;	maturation of SSU-rRNA from tricistronic rRNA transcript (SSU-rRNA, 5.8S rRNA, LSU-rRNA); nuclear-transcribed mRNA catabolic process, nonsense-mediated decay; rRNA processing; SRP-dependent cotranslational protein targeting to membrane; translation; translational initiation; viral transcription;	RNA binding; structural constituent of ribosome;
AIDEVKRQWR	EEVASLQAVMKETVR	Q15276			Rab GTPase-binding effector protein 1;	9.469	110	862	Rabaptin-4;Rabaptin-5;Rabaptin-5alpha;Renal carcinoma antigen NY-REN-17;	early endosome; early endosome membrane; endocytic vesicle; endosome; intracellular membrane-bounded organelle; protein complex; recycling endosome;	apoptotic process; endocytosis; membrane fusion; membrane organization; protein transport; vesicle-mediated transport;	growth factor activity; GTPase activator activity; protein domain specific binding; protein homodimerization activity;
KERVARTTSR	EEVDEAASTLTR	Q9UKT5			F-box only protein 4;	9.469	48	387		cytoplasm; cytosol; SCF ubiquitin ligase complex; ubiquitin ligase complex;	aging; cellular homeostasis; cellular response to ionizing radiation; common myeloid progenitor cell proliferation; negative regulation of fibroblast proliferation; negative regulation of protein localization to nucleus; positive regulation of protein polyubiquitination; positive regulation of protein ubiquitination; positive regulation of telomere maintenance via telomerase; posttranscriptional …	protein homodimerization activity; ubiquitin protein ligase activity; ubiquitin-protein transferase activity;
YLGLLQAEYT	EGDALDALGLKR	P62875			DNA-directed RNA polymerases I, II, and III subunit RPABC5;	9.469	29	67	DNA-directed RNA polymerase III subunit L;RNA polymerase II 7.6 kDa subunit;RPB10 homolog;	cytosol; DNA-directed RNA polymerase I complex; DNA-directed RNA polymerase II, core complex; DNA-directed RNA polymerase III complex; nucleoplasm; nucleus;	7-methylguanosine mRNA capping; fibroblast growth factor receptor signaling pathway; gene expression; gene silencing by RNA; mRNA splicing, via spliceosome; positive regulation of gene expression, epigenetic; positive regulation of type I interferon production; positive regulation of viral transcription; regulation of transcription from RNA polymerase I promoter; snRNA transcription from RNA poly…	DNA binding; DNA-directed 5'-3' RNA polymerase activity; zinc ion binding;
HLMVAGWDQR	EGGQVYGTLGGMLTR	P28065			Proteasome subunit beta type-9;	9.469	125	219	Low molecular mass protein 2;Macropain chain 7;Multicatalytic endopeptidase complex chain 7;Proteasome chain 7;Proteasome subunit beta-1i;Really interesting new gene 12 protein;	cytosol; extracellular exosome; nucleoplasm; proteasome complex; proteasome core complex; spermatoproteasome complex;	anaphase-promoting complex-dependent catabolic process; antigen processing and presentation of exogenous peptide antigen via MHC class I, TAP-dependent; Fc-epsilon receptor signaling pathway; MAPK cascade; negative regulation of canonical Wnt signaling pathway; negative regulation of G2/M transition of mitotic cell cycle; negative regulation of ubiquitin-protein ligase activity involved in mitoti…	threonine-type endopeptidase activity;
MSEEKRAKLR	EIELKVMKFQDELESGK	O15042			U2 snRNP-associated SURP motif-containing protein;	9.469	844	1029	140 kDa Ser/Arg-rich domain protein;U2-associated protein SR140;	nucleoplasm; nucleus;	mRNA splicing, via spliceosome;	RNA binding;
RMKDQCDKCR	EILSVDCSTNNPSQAKLR	P10909			Clusterin;	9.469	305	449	Aging-associated gene 4 protein;Apolipoprotein J;Complement cytolysis inhibitor;Complement-associated protein SP-40,40;Ku70-binding protein 1;NA1/NA2;Testosterone-repressed prostate message 2;	apical dendrite; blood microparticle; cell surface; chromaffin granule; cytoplasm; cytosol; endoplasmic reticulum; extracellular exosome; extracellular matrix; extracellular region; extracellular space; Golgi apparatus; intracellular; mitochondrial membrane; mitochondrion; neurofibrillary tangle; nucleus; perinuclear region of cytoplasm; platelet alpha granule lumen; protein complex; spherical hi…	antimicrobial humoral response; cell morphogenesis; central nervous system myelin maintenance; chaperone-mediated protein complex assembly; chaperone-mediated protein folding; complement activation; complement activation, classical pathway; innate immune response; intrinsic apoptotic signaling pathway; lipid metabolic process; microglial cell activation; microglial cell proliferation; negative re…	chaperone binding; misfolded protein binding; ubiquitin protein ligase binding;
LDRNLVLLVR	EKFGDQDVWILPQAEWQPGETLR	Q9H2W6			39S ribosomal protein L46, mitochondrial;	9.469	161	279	Mitochondrial large ribosomal subunit protein mL46 {ECO:0000303|PubMed:25278503};P2ECSL;	cell junction; mitochondrial inner membrane; mitochondrial large ribosomal subunit; mitochondrion; nucleoplasm;	mitochondrial translational elongation; mitochondrial translational termination;	hydrolase activity; structural constituent of ribosome;
QQRIRRQLAR	EKKLYANMFER	Q02790			Peptidyl-prolyl cis-trans isomerase FKBP4;	9.469	405	459	51 kDa FK506-binding protein;52 kDa FK506-binding protein;59 kDa immunophilin;FK506-binding protein 4;FKBP59;HSP-binding immunophilin;Immunophilin FKBP52;Rotamase;	axonal growth cone; cytoplasm; cytosol; extracellular exosome; microtubule; mitochondrion; neuronal cell body; nucleoplasm; perinuclear region of cytoplasm; protein complex;	androgen receptor signaling pathway; chaperone-mediated protein folding; copper ion transport; embryo implantation; male sex differentiation; negative regulation of microtubule polymerization; negative regulation of microtubule polymerization or depolymerization; negative regulation of neuron projection development; prostate gland development; protein complex localization; protein folding; regula…	ATP binding; copper-dependent protein binding; FK506 binding; glucocorticoid receptor binding; GTP binding; heat shock protein binding; peptidyl-prolyl cis-trans isomerase activity; phosphoprotein binding; protein binding, bridging; RNA binding; tau protein binding;
DMMVAEYSLR	EKLPANQYTWSSR	P29144			Tripeptidyl-peptidase 2;	9.469	398	1249	Tripeptidyl aminopeptidase;Tripeptidyl-peptidase II;	cytoplasm; cytosol; nuclear body; nucleoplasm;	protein polyubiquitination; proteolysis;	aminopeptidase activity; endopeptidase activity; serine-type endopeptidase activity; tripeptidyl-peptidase activity;
GLSLTKVDER	EKQAALEEEQAR	Q13492			Phosphatidylinositol-binding clathrin assembly protein;	9.469	321	652	Clathrin assembly lymphoid myeloid leukemia protein;	clathrin-coated pit; clathrin-coated vesicle; cytosol; Golgi apparatus; intracellular membrane-bounded organelle; membrane; neurofibrillary tangle; neuronal cell body; nucleus; perinuclear region of cytoplasm; postsynaptic membrane; presynaptic membrane; vesicle;	axonogenesis; cargo loading into vesicle; cell proliferation; clathrin coat assembly; clathrin-dependent endocytosis; dendrite morphogenesis; endosomal transport; hemopoiesis; iron ion homeostasis; iron ion import into cell; membrane organization; negative regulation of gene expression; negative regulation of metalloendopeptidase activity involved in amyloid precursor protein catabolic process; n…	1-phosphatidylinositol binding; cadherin binding; clathrin adaptor activity; clathrin binding; clathrin heavy chain binding;
FTYNPFMRVR	EKTVQQHAGETDPVTTMR	Q16775			Hydroxyacylglutathione hydrolase, mitochondrial {ECO:0000303|PubMed:15117945};	9.469	275	308	Glyoxalase II;	cytoplasm; cytosol; extracellular exosome; mitochondrial matrix;	glutathione biosynthetic process; methylglyoxal catabolic process to D-lactate via S-lactoyl-glutathione; pyruvate metabolic process;	hydroxyacylglutathione hydrolase activity; metal ion binding;
TVQFVQGIFV	EKYDPTIEDSYR	P62834	P61224	A6NIZ1	Ras-related protein Rap-1A;	9.469	28	184	C21KG;G-22K;GTP-binding protein smg p21A;Ras-related protein Krev-1;	cell junction; cytoplasm; cytosol; early endosome; extracellular exosome; guanyl-nucleotide exchange factor complex; late endosome; myelin sheath; neuron projection; perinuclear region of cytoplasm; phagocytic vesicle; plasma membrane; specific granule membrane;	activation of MAPKK activity; cellular response to cAMP; cellular response to drug; cellular response to glucose stimulus; cellular response to nerve growth factor stimulus; establishment of endothelial barrier; liver regeneration; negative regulation of collagen biosynthetic process; negative regulation of synaptic vesicle exocytosis; nerve growth factor signaling pathway; neutrophil degranulati…	GTP binding; GTPase activity; protein complex binding; protein transporter activity; Rap guanyl-nucleotide exchange factor activity; Ras GTPase binding;
AWFPGSGAFR	ELVSCSNCTDYQAR	P49591			Serine--tRNA ligase, cytoplasmic;	9.469	389	514	Seryl-tRNA synthetase;Seryl-tRNA(Ser/Sec) synthetase;	cytoplasm; cytosol; extracellular exosome;	selenocysteine metabolic process; selenocysteinyl-tRNA(Sec) biosynthetic process; seryl-tRNA aminoacylation; translation; tRNA aminoacylation for protein translation; tRNA processing;	ATP binding; RNA binding; selenocysteine-tRNA ligase activity; serine-tRNA ligase activity;
PLLPDPLGCR	EPGCLFAVPAQSAPPNR	O75078			Disintegrin and metalloproteinase domain-containing protein 11;	9.469	200	769	Metalloproteinase-like, disintegrin-like, and cysteine-rich protein;	integral component of membrane; plasma membrane;	integrin-mediated signaling pathway;	integrin binding; metalloendopeptidase activity; metallopeptidase activity;
VRLQHLRFLR	EPVVTPQDLEGPGR	Q66K74			Microtubule-associated protein 1S;	9.469	454	1059	BPY2-interacting protein 1;Microtubule-associated protein 8;Variable charge Y chromosome 2-interacting protein 1;	cell junction; cell projection; cytosol; dendrite; microtubule; neuronal cell body; nucleolus; nucleus; perinuclear region of cytoplasm; spindle; synapse;	apoptotic process; autophagy; brain development; microtubule bundle formation; mitochondrion transport along microtubule; nervous system development; neuron projection morphogenesis; regulation of chromatin disassembly;	actin filament binding; beta-tubulin binding; DNA binding; identical protein binding; microtubule binding; tubulin binding;
EKLCYVALDF	EQEMATAASSSSLEKSYELPDGQVITIGNER	P60709	P63261	Q6S8J3	Actin, cytoplasmic 1;	9.469	922	1075	Beta-actin;	blood microparticle; cortical cytoskeleton; cytoplasm; cytoplasmic ribonucleoprotein granule; cytoskeleton; cytosol; dense body; extracellular exosome; extracellular space; focal adhesion; intracellular ribonucleoprotein complex; membrane; myelin sheath; NuA4 histone acetyltransferase complex; nuclear chromatin; nucleoplasm; plasma membrane; protein complex; vesicle;	ATP-dependent chromatin remodeling; cell junction assembly; ephrin receptor signaling pathway; Fc-gamma receptor signaling pathway involved in phagocytosis; membrane organization; movement of cell or subcellular component; platelet aggregation; positive regulation of gene expression, epigenetic; postsynaptic actin cytoskeleton organization; protein deubiquitination; retina homeostasis; substantia…	ATP binding; identical protein binding; kinesin binding; nitric-oxide synthase binding; structural constituent of cytoskeleton; structural constituent of postsynaptic actin cytoskeleton; Tat protein binding;
AGPQPLALQL	EQLLNPRPSEADPEADPEEATAAR	Q9NY61			Protein AATF;	9.469	10	560	Apoptosis-antagonizing transcription factor;Rb-binding protein Che-1;	cytoplasm; Golgi apparatus; nucleolus; nucleus;	cell adhesion; cellular response to DNA damage stimulus; embryonic cleavage; negative regulation of amyloid precursor protein biosynthetic process; negative regulation of apoptotic process; negative regulation of reactive oxygen species metabolic process; negative regulation of superoxide anion generation; positive regulation of transcription from RNA polymerase II promoter; regulation of mitotic…	leucine zipper domain binding; RNA binding; tau protein binding; transcription factor activity, sequence-specific DNA binding;
KEGSLLSKQE	ESKAAFGEEVDAVDTGISR	O00273			DNA fragmentation factor subunit alpha;	9.469	209	331	DNA fragmentation factor 45 kDa subunit;Inhibitor of CAD;	cytosol; nuclear chromatin; nucleoplasm; nucleus; plasma membrane;	apoptotic DNA fragmentation; chaperone-mediated protein folding; negative regulation of apoptotic DNA fragmentation; negative regulation of deoxyribonuclease activity; negative regulation of execution phase of apoptosis; positive regulation of apoptotic process; thymocyte apoptotic process;	deoxyribonuclease inhibitor activity; protein binding involved in protein folding; protein domain specific binding;
DRPQQPMTHR	ETAPVSQPENKPESKPGPVGPELPPGHIPIQVIR	O95817			BAG family molecular chaperone regulator 3;	9.469	308	575	Bcl-2-associated athanogene 3;Bcl-2-binding protein Bis;Docking protein CAIR-1;	cytoplasm; cytosol; neuron projection; nucleus; plasma membrane; Z disc;	brain development; cellular response to heat; cellular response to mechanical stimulus; extrinsic apoptotic signaling pathway in absence of ligand; extrinsic apoptotic signaling pathway via death domain receptors; negative regulation of apoptotic process; negative regulation of striated muscle cell apoptotic process; negative regulation of transcription from RNA polymerase II promoter in response…	adenyl-nucleotide exchange factor activity; cadherin binding; chaperone binding; protein complex binding;
PAAPDQPCVL	FADAPEPGQALPVEEEAVTLAR	Q9C0C2			182 kDa tankyrase-1-binding protein;	9.469	632	1729		CCR4-NOT complex; cell-cell adherens junction; cytoplasm; cytoskeleton; cytosol; nuclear heterochromatin; nucleus;	cellular response to ionizing radiation; DNA damage response, signal transduction by p53 class mediator resulting in cell cycle arrest; double-strand break repair; nuclear-transcribed mRNA poly(A) tail shortening; positive regulation of peptidyl-serine phosphorylation; positive regulation of peptidyl-threonine phosphorylation; positive regulation of protein autophosphorylation; telomere maintenan…	ankyrin repeat binding; cadherin binding; enzyme binding; macromolecular complex binding;
EPLGRVSFEL	FADKVPKTAENFR	P62937			Peptidyl-prolyl cis-trans isomerase A;	9.469	23	165	Cyclophilin A;Cyclosporin A-binding protein;Rotamase A;	cytosol; extracellular exosome; extracellular region; extracellular space; ficolin-1-rich granule lumen; focal adhesion; membrane; nucleus; secretory granule lumen; vesicle;	entry into host cell; establishment of integrated proviral latency; fusion of virus membrane with host plasma membrane; leukocyte migration; lipid particle organization; neutrophil degranulation; positive regulation of protein secretion; positive regulation of viral genome replication; protein folding; protein peptidyl-prolyl isomerization; regulation of viral genome replication; RNA-dependent DN…	cyclosporin A binding; peptidyl-prolyl cis-trans isomerase activity; RNA binding; unfolded protein binding; virion binding;
KKKHPDSSVN	FAEFSKKCSER	O15347	P26583		High mobility group protein B3;	9.469	36	209	High mobility group protein 2a;High mobility group protein 4;	chromosome; cytoplasm; nucleus;	DNA geometric change; DNA recombination; innate immune response; multicellular organism development; regulation of transcription, DNA-templated; transcription, DNA-templated;	DNA binding, bending; double-stranded DNA binding; four-way junction DNA binding; RNA binding;
KHAHSILQFQ	FAEVKEALKQR	Q32MZ4			Leucine-rich repeat flightless-interacting protein 1;	9.469	232	808	GC-binding factor 2;TAR RNA-interacting protein;	cytoplasm; cytoskeleton; cytosol; nucleus; plasma membrane;	negative regulation of transcription, DNA-templated; positive regulation of NF-kappaB transcription factor activity; positive regulation of type I interferon production; regulation of transcription from RNA polymerase II promoter; transcription, DNA-templated;	cadherin binding; DNA binding; double-stranded RNA binding; protein homodimerization activity;
ALENAASLKL	FAGSLAPLLQPGAAGGEIPAVQASSGSPKAR	O95359			Transforming acidic coiled-coil-containing protein 2;	9.469	1285	2948	Anti-Zuai-1;	cytoplasm; cytosol; microtubule cytoskeleton; microtubule organizing center; nucleoplasm; plasma membrane;	cell proliferation; cerebral cortex development; microtubule cytoskeleton organization;	nuclear hormone receptor binding;
LVPEEADEHL	FALEKLVKER	Q8WUX2			Putative glutathione-specific gamma-glutamylcyclotransferase 2 {ECO:0000250|UniProtKB:Q9BUX1};	9.469	163	184	Cation transport regulator-like protein 2 {ECO:0000250|UniProtKB:Q9BUX1};	cytoplasm; cytosol;	glutathione biosynthetic process; glutathione catabolic process;	gamma-glutamylcyclotransferase activity;
TRDSTHLICA	FANTPKYSQVLGLGGR	P18887			DNA repair protein XRCC1;	9.469	362	633	X-ray repair cross-complementing protein 1;	ERCC4-ERCC1 complex; nuclear chromosome, telomeric region; nucleoplasm; nucleus;	base-excision repair, DNA ligation; double-strand break repair via homologous recombination; double-strand break repair via nonhomologous end joining; hippocampus development; negative regulation of protection from non-homologous end joining at telomere; nucleotide-excision repair, DNA gap filling; response to drug; response to hypoxia; response to organic substance; single strand break repair; t…	3' overhang single-stranded DNA endodeoxyribonuclease activity; damaged DNA binding; DNA ligase activity; enzyme binding;
LDYVMAAANL	FAQTYGLTGSQDR	P22314			Ubiquitin-like modifier-activating enzyme 1;	9.469	770	1058	Protein A1S9;Ubiquitin-activating enzyme E1;	cytoplasm; cytosol; extracellular exosome; mitochondrion; nucleoplasm; nucleus;	cellular response to DNA damage stimulus; protein ubiquitination;	ATP binding; RNA binding; ubiquitin activating enzyme activity;
KWNSNDFIDA	FASPVEAEGTPEPGAEAAKGIEDGAQAPR	O00562			Membrane-associated phosphatidylinositol transfer protein 1;	9.469	378	1244	Drosophila retinal degeneration B homolog;Phosphatidylinositol transfer protein, membrane-associated 1;Pyk2 N-terminal domain-interacting receptor 2;	cleavage furrow; cytosol; endoplasmic reticulum membrane; Golgi cisterna membrane; lipid particle; membrane; midbody; P-body;	brain development; lipid metabolic process; phosphatidylinositol biosynthetic process; phospholipid transport; phototransduction; protein transport;	metal ion binding; phosphatidic acid binding; phosphatidylcholine binding; phosphatidylinositol binding; phosphatidylinositol transporter activity;
QGPMDISEKL	FCSTCDQTFQNHQEQR	Q9H8Y5			Ankyrin repeat and zinc finger domain-containing protein 1;	9.469	71	726	Zinc finger protein 744;	Cdc48p-Npl4p-Vms1p AAA ATPase complex; membrane;	mitochondria-associated ubiquitin-dependent protein catabolic process; ubiquitin-dependent catabolism of misfolded proteins by nucleus-associated proteasome; ubiquitin-dependent ERAD pathway;	metal ion binding; nucleic acid binding;
FFCNRAKLFR	FDVESKEWKER	P49792			E3 SUMO-protein ligase RanBP2;	9.469	1202	3224	358 kDa nucleoporin;Nuclear pore complex protein Nup358;Nucleoporin Nup358;Ran-binding protein 2;p270;	annulate lamellae; centrosome; cytoplasm; cytosol; intracellular membrane-bounded organelle; membrane; nuclear envelope; nuclear inclusion body; nuclear membrane; nuclear pore; nuclear pore cytoplasmic filaments; nuclear pore nuclear basket;	centrosome localization; G1/S transition of mitotic cell cycle; gene silencing by RNA; intracellular transport of virus; mitotic nuclear envelope disassembly; mRNA export from nucleus; NLS-bearing protein import into nucleus; positive regulation of GTPase activity; positive regulation of mitotic centrosome separation; protein folding; protein sumoylation; regulation of cellular response to heat; …	ligase activity; peptidyl-prolyl cis-trans isomerase activity; Ran GTPase binding; RNA binding; SUMO transferase activity; zinc ion binding;
DTEEHHLRDY	FEEYGKIDTIEIITDR	P22626			Heterogeneous nuclear ribonucleoproteins A2/B1;	9.469	130	353		Cajal body; catalytic step 2 spliceosome; chromosome, telomeric region; cytoplasm; extracellular exosome; intracellular ribonucleoprotein complex; membrane; nuclear matrix; nucleoplasm; nucleus; spliceosomal complex;	G-quadruplex DNA unwinding; gene expression; miRNA transport; mRNA export from nucleus; mRNA processing; mRNA splicing, via spliceosome; negative regulation of mRNA splicing, via spliceosome; negative regulation of transcription from RNA polymerase II promoter; positive regulation of telomerase RNA reverse transcriptase activity; positive regulation of telomere maintenance via telomere lengthenin…	G-rich strand telomeric DNA binding; miRNA binding; mRNA 3'-UTR binding; N6-methyladenosine-containing RNA binding; pre-mRNA intronic binding; RNA binding; single-stranded telomeric DNA binding;
SCIAMMCNEF	FEGFPDKQPR	P26447			Protein S100-A4;	9.469	88	101	Calvasculin;Metastasin;Placental calcium-binding protein;Protein Mts1;S100 calcium-binding protein A4;	extracellular exosome; extracellular space; neuron projection; nucleus; perinuclear region of cytoplasm;	epithelial to mesenchymal transition; positive regulation of I-kappaB kinase/NF-kappaB signaling;	actin binding; calcium ion binding; calcium-dependent protein binding; identical protein binding; RAGE receptor binding; RNA binding; transition metal ion binding;
DKLFDQRELR	FEIGEGENLDLPYGLER	Q02790			Peptidyl-prolyl cis-trans isomerase FKBP4;	9.469	188	459	51 kDa FK506-binding protein;52 kDa FK506-binding protein;59 kDa immunophilin;FK506-binding protein 4;FKBP59;HSP-binding immunophilin;Immunophilin FKBP52;Rotamase;	axonal growth cone; cytoplasm; cytosol; extracellular exosome; microtubule; mitochondrion; neuronal cell body; nucleoplasm; perinuclear region of cytoplasm; protein complex;	androgen receptor signaling pathway; chaperone-mediated protein folding; copper ion transport; embryo implantation; male sex differentiation; negative regulation of microtubule polymerization; negative regulation of microtubule polymerization or depolymerization; negative regulation of neuron projection development; prostate gland development; protein complex localization; protein folding; regula…	ATP binding; copper-dependent protein binding; FK506 binding; glucocorticoid receptor binding; GTP binding; heat shock protein binding; peptidyl-prolyl cis-trans isomerase activity; phosphoprotein binding; protein binding, bridging; RNA binding; tau protein binding;
EGSHRAHSLL	FENSDSFSEDSSTLGR	Q8IZ21			Phosphatase and actin regulator 4;	9.469	444	702		cytoplasm; lamellipodium;	actin cytoskeleton organization; closure of optic fissure; enteric nervous system development; negative regulation of integrin-mediated signaling pathway; neural crest cell migration; neural tube closure; positive regulation of catalytic activity; regulation of cell cycle; Rho protein signal transduction;	actin binding; protein phosphatase 1 binding; protein phosphatase activator activity;
DFSPVPWSQY	FESMEDVEVENETGKDTFR	Q9Y570			Protein phosphatase methylesterase 1;	9.469	48	386			protein demethylation;	cadherin binding; protein C-terminal methylesterase activity; protein kinase binding; protein phosphatase 2A binding; protein phosphatase binding; protein phosphatase inhibitor activity; protein phosphatase regulator activity;
DGKADVSFVL	FFDCNNEICIER	P30085			UMP-CMP kinase {ECO:0000255|HAMAP-Rule:MF_03172};	9.469	117	196	Deoxycytidylate kinase {ECO:0000255|HAMAP-Rule:MF_03172};Nucleoside-diphosphate kinase {ECO:0000255|HAMAP-Rule:MF_03172};Uridine monophosphate/cytidine monophosphate kinase {ECO:0000255|HAMAP-Rule:MF_03172};	cytoplasm; cytosol; extracellular exosome; nucleolus; nucleus;	'de novo' pyrimidine nucleobase biosynthetic process; nucleobase-containing small molecule interconversion; nucleoside diphosphate phosphorylation; nucleoside triphosphate biosynthetic process; pyrimidine ribonucleotide biosynthetic process;	ATP binding; cytidylate kinase activity; nucleoside diphosphate kinase activity; nucleoside phosphate kinase activity; uridine kinase activity; uridylate kinase activity;
PINFTMFLTM	FGEKLNGTDPEDVIR	P19105	O14950	P24844	Myosin regulatory light chain 12A;	9.469	88	172	Epididymis secretory protein Li 24;MLC-2B;Myosin RLC;Myosin regulatory light chain 2, nonsarcomeric;Myosin regulatory light chain MRLC3;	cytosol; extracellular exosome; myosin complex;	ephrin receptor signaling pathway; muscle contraction; platelet aggregation;	calcium ion binding;
VRNGIYPLTA	FGLPRPQQPQQEEVTSPVVPPSVKTPTPEPAEVETR	Q9UHY1			Nuclear receptor-binding protein;	9.469	405	535		cell cortex; cytosol; endomembrane system; lamellipodium; membrane; nucleoplasm;	ER to Golgi vesicle-mediated transport; intracellular signal transduction; protein phosphorylation; transcription initiation from RNA polymerase II promoter;	ATP binding; protein homodimerization activity; protein serine/threonine kinase activity;
YDWINAERHL	FGQPNSAYDFKTNNPKEAGQR	O95347			Structural maintenance of chromosomes protein 2;	9.469	946	1197	Chromosome-associated protein E;XCAP-E homolog;	condensed chromosome; condensin complex; cytoplasm; cytosol; extracellular exosome; nuclear chromosome; nucleolus; nucleoplasm; nucleus;	cell division; kinetochore organization; meiotic chromosome condensation; meiotic chromosome segregation; mitotic chromosome condensation;	ATP binding; protein heterodimerization activity;
MENSQLCKL	FIGGLNVQTSESGLR	Q13151			Heterogeneous nuclear ribonucleoprotein A0;	9.469	8	305		intracellular ribonucleoprotein complex; nucleoplasm; nucleus;	3'-UTR-mediated mRNA stabilization; gene expression; inflammatory response; mRNA processing; mRNA splicing, via spliceosome; response to lipopolysaccharide;	AU-rich element binding; protein kinase binding; RNA binding;
ELAAELVQLG	FISEADQSR	Q9UHY1			Nuclear receptor-binding protein;	9.469	496	535		cell cortex; cytosol; endomembrane system; lamellipodium; membrane; nucleoplasm;	ER to Golgi vesicle-mediated transport; intracellular signal transduction; protein phosphorylation; transcription initiation from RNA polymerase II promoter;	ATP binding; protein homodimerization activity; protein serine/threonine kinase activity;
REEMKVSAKL	FIVESNSSSSTR	P48507			Glutamate--cysteine ligase regulatory subunit;	9.469	94	274	GCS light chain;Gamma-ECS regulatory subunit;Gamma-glutamylcysteine synthetase regulatory subunit;Glutamate--cysteine ligase modifier subunit;	cytosol; glutamate-cysteine ligase complex;	aging; apoptotic mitochondrial changes; cellular response to fibroblast growth factor stimulus; cellular response to follicle-stimulating hormone stimulus; cellular response to glucose stimulus; cellular response to hepatocyte growth factor stimulus; cellular response to thyroxine stimulus; cysteine metabolic process; glutamate metabolic process; glutathione biosynthetic process; hepatic stellate…	enzyme regulator activity; glutamate-cysteine ligase activity; glutamate-cysteine ligase catalytic subunit binding; protein heterodimerization activity;
EDVSREFVEE	FIWPAIQSSALYEDR	P00966			Argininosuccinate synthase {ECO:0000305};	9.469	70	412	Citrulline--aspartate ligase;	cytoplasm; cytosol; extracellular exosome; mitochondrion; myelin sheath;	arginine biosynthetic process; argininosuccinate metabolic process; aspartate metabolic process; cellular response to laminar fluid shear stress; citrulline metabolic process; negative regulation of leukocyte cell-cell adhesion; positive regulation of nitric oxide biosynthetic process; urea cycle;	amino acid binding; argininosuccinate synthase activity; ATP binding; identical protein binding; RNA binding;
SLGLCYHLHC	FKCVACECDLGGSSSGAEVR	Q8WWI1			LIM domain only protein 7;	9.469	1639	1683	F-box only protein 20;LOMP;	cytoplasm; cytosol; focal adhesion; nucleus; ubiquitin ligase complex;	protein polyubiquitination; protein ubiquitination; regulation of cell adhesion; regulation of signaling;	ubiquitin-protein transferase activity; zinc ion binding;
QWARDEFEGL	FKQPAENVNQYLTDPKFVER	P22314			Ubiquitin-like modifier-activating enzyme 1;	9.469	654	1058	Protein A1S9;Ubiquitin-activating enzyme E1;	cytoplasm; cytosol; extracellular exosome; mitochondrion; nucleoplasm; nucleus;	cellular response to DNA damage stimulus; protein ubiquitination;	ATP binding; RNA binding; ubiquitin activating enzyme activity;
VNSSSPVMLA	FKSFQQELDAR	Q99598			Translin-associated protein X;	9.469	37	290	Translin-associated factor X;	cytosol; Golgi apparatus; nucleus; perinuclear region of cytoplasm;	cell differentiation; gene silencing by RNA; multicellular organism development; spermatogenesis;	DNA binding; metal ion binding; protein transporter activity; RNA binding; sequence-specific DNA binding;
VYQAAALSKA	FKVKPFVVR	Q9Y4L1			Hypoxia up-regulated protein 1;	9.469	428	999	150 kDa oxygen-regulated protein;170 kDa glucose-regulated protein;	endocytic vesicle lumen; endoplasmic reticulum; endoplasmic reticulum chaperone complex; endoplasmic reticulum lumen; extracellular exosome; extracellular region; focal adhesion; membrane; smooth endoplasmic reticulum;	cellular response to hypoxia; ER to Golgi vesicle-mediated transport; IRE1-mediated unfolded protein response; negative regulation of endoplasmic reticulum stress-induced neuron intrinsic apoptotic signaling pathway; negative regulation of hypoxia-induced intrinsic apoptotic signaling pathway; receptor-mediated endocytosis; response to endoplasmic reticulum stress; response to ischemia;	ATP binding; chaperone binding;
HALHNDLKVL	FLDHPKKKIR	Q9GZR2			RNA exonuclease 4;	9.469	334	422	Exonuclease XPMC2;Prevents mitotic catastrophe 2 protein homolog;	nuclear speck; nucleolus; nucleus;	regulation of transcription, DNA-templated;	exonuclease activity; RNA binding; transcription factor activity, sequence-specific DNA binding;
LFKEAPFSEF	FLDPGTSVLDTCR	Q9Y2Z4			Tyrosine--tRNA ligase, mitochondrial;	9.469	400	477	Tyrosyl-tRNA synthetase;	cytosol; mitochondrial matrix; mitochondrion; nuclear body;	mitochondrial tyrosyl-tRNA aminoacylation; translation; tRNA aminoacylation; tRNA aminoacylation for protein translation;	ATP binding; protein homodimerization activity; RNA binding; tRNA binding; tyrosine binding; tyrosine-tRNA ligase activity;
PMAQGMRSDF	FLEGPFMPPR	P78344			Eukaryotic translation initiation factor 4 gamma 2;	9.469	349	907	Death-associated protein 5;p97;	cell-cell adherens junction; cytosol; eukaryotic translation initiation factor 4F complex; membrane;	cell cycle arrest; cell death; cellular macromolecule biosynthetic process; negative regulation of autophagy; positive regulation of cell growth; regulation of translational initiation;	cadherin binding; RNA binding; translation factor activity, RNA binding; translation initiation factor activity;
PYQATIDGVR	FLGTSGQNVSDIFR	P49005			DNA polymerase delta subunit 2;	9.469	339	469	DNA polymerase delta subunit p50;	delta DNA polymerase complex; nucleoplasm; nucleus;	cellular response to DNA damage stimulus; DNA damage response, detection of DNA damage; DNA ligation; DNA replication; DNA strand elongation involved in DNA replication; mismatch repair; nucleotide-excision repair, DNA gap filling; nucleotide-excision repair, DNA incision; nucleotide-excision repair, DNA incision, 5'-to lesion; telomere maintenance; telomere maintenance via recombination; transcr…	DNA binding; DNA-directed DNA polymerase activity;
RRLVPDSDVR	FLLSESGSGKGAAMVTAVAYR	P19367			Hexokinase-1;	9.469	440	917	Brain form hexokinase;Hexokinase type I;	cytosol; membrane raft; mitochondrial outer membrane; mitochondrion; sperm principal piece;	canonical glycolysis; cellular glucose homeostasis; establishment of protein localization to mitochondrion; glucose transport; glycolytic process; maintenance of protein location in mitochondrion;	ATP binding; fructokinase activity; glucokinase activity; glucose binding; hexokinase activity; mannokinase activity;
NLDCPELIEA	FLNSQKAGKEKDGTKR	Q13185			Chromobox protein homolog 3;	9.469	74	183	HECH;Heterochromatin protein 1 homolog gamma;Modifier 2 protein;	chromatin; chromosome, centromeric region; condensed chromosome, centromeric region; nuclear chromosome, telomeric region; nuclear envelope; nuclear euchromatin; nuclear heterochromatin; nuclear inner membrane; nuclear pericentric heterochromatin; nucleus; senescence-associated heterochromatin focus; spindle;	cellular response to dexamethasone stimulus; chromatin remodeling; covalent chromatin modification; negative regulation of transcription, DNA-templated; rhythmic process; transcription, DNA-templated;	enzyme binding; histone methyltransferase binding; identical protein binding; protein domain specific binding;
GKEETLTRTY	FLQAGEASGAPPAR	Q9BY89			Uncharacterized protein KIAA1671;	9.469	31	1806
QAERYEDMAA	FMKGAVEKGEELSCEER	P31947			14-3-3 protein sigma;	9.469	23	248	Epithelial cell marker protein 1;Stratifin;	cytoplasmic vesicle membrane; cytosol; extracellular exosome; extracellular space; mitochondrion; nucleus;	DNA damage response, signal transduction by p53 class mediator resulting in cell cycle arrest; establishment of skin barrier; intrinsic apoptotic signaling pathway in response to DNA damage; keratinization; keratinocyte development; membrane organization; negative regulation of cysteine-type endopeptidase activity involved in apoptotic process; negative regulation of keratinocyte proliferation; n…	cadherin binding; identical protein binding; phosphoprotein binding; protein domain specific binding; protein kinase binding; protein kinase C inhibitor activity;
KLTHAAPCML	FMKGTPQEPR	O76003			Glutaredoxin-3;	9.469	147	335	PKC-interacting cousin of thioredoxin {ECO:0000303|PubMed:10636891};PKC-theta-interacting protein;Thioredoxin-like protein 2;	cell cortex; cytosol; dendrite; extracellular exosome; nucleus; Z disc;	[2Fe-2S] cluster assembly; cell redox homeostasis; negative regulation of cardiac muscle hypertrophy; protein maturation by iron-sulfur cluster transfer; regulation of the force of heart contraction;	electron carrier activity; iron-sulfur cluster binding; metal ion binding; protein disulfide oxidoreductase activity; protein kinase C binding; RNA binding;
STDLPLNIEC	FMNDKDVSGKMNR	Q92598			Heat shock protein 105 kDa;	9.469	289	858	Antigen NY-CO-25;Heat shock 110 kDa protein;	cytoplasm; cytosol; endocytic vesicle lumen; extracellular exosome; extracellular region; microtubule; nucleoplasm;	chaperone mediated protein folding requiring cofactor; negative regulation of establishment of protein localization to mitochondrion; negative regulation of intrinsic apoptotic signaling pathway in response to hydrogen peroxide; negative regulation of p38MAPK cascade; positive regulation of MHC class I biosynthetic process; positive regulation of NK T cell activation; positive regulation of prote…	adenyl-nucleotide exchange factor activity; alpha-tubulin binding; ATP binding;
GDSETDLEAL	FNAVMNPKTANVPQTVPMR	P46937			Transcriptional coactivator YAP1;	9.469	67	504	Protein yorkie homolog;Yes-associated protein YAP65 homolog;	cytoplasm; cytosol; membrane; nucleoplasm; nucleus; TEAD-1-YAP complex; TEAD-2-YAP complex;	bud elongation involved in lung branching; cell morphogenesis; cell proliferation; cellular response to DNA damage stimulus; cellular response to gamma radiation; cellular response to retinoic acid; contact inhibition; embryonic heart tube morphogenesis; hippo signaling; keratinocyte differentiation; lateral mesoderm development; lung epithelial cell differentiation; negative regulation of epithe…	activating transcription factor binding; chromatin binding; proline-rich region binding; protein C-terminus binding; protein heterodimerization activity; RNA polymerase II core promoter sequence-specific DNA binding; transcription coactivator activity; transcription corepressor activity; transcription factor activity, RNA polymerase II transcription factor binding; transcription regulatory region…
ETGFVYGGNR	FNCGTWMDKMGESDR	P35573			Glycogen debranching enzyme;	9.469	1252	1532	Glycogen debrancher;	cytoplasm; cytosol; extracellular region; ficolin-1-rich granule lumen; inclusion body; isoamylase complex; nucleus; sarcoplasmic reticulum; secretory granule lumen;	glycogen biosynthetic process; glycogen catabolic process; neutrophil degranulation; response to glucocorticoid; response to nutrient;	4-alpha-glucanotransferase activity; amylo-alpha-1,6-glucosidase activity; glycogen debranching enzyme activity; polysaccharide binding; polyubiquitin binding;
VFGVCHIFAS	FNDTFVHVTDLSGKETICR	P62263			40S ribosomal protein S14;	9.469	35	151	Small ribosomal subunit protein uS11 {ECO:0000303|PubMed:24524803};	cytosol; cytosolic small ribosomal subunit; extracellular exosome; extracellular matrix; focal adhesion; membrane; mitochondrion; nucleolus; nucleoplasm;	erythrocyte differentiation; maturation of SSU-rRNA; maturation of SSU-rRNA from tricistronic rRNA transcript (SSU-rRNA, 5.8S rRNA, LSU-rRNA); negative regulation of transcription from RNA polymerase II promoter; nuclear-transcribed mRNA catabolic process, nonsense-mediated decay; ribosomal small subunit assembly; rRNA processing; SRP-dependent cotranslational protein targeting to membrane; trans…	mRNA 5'-UTR binding; RNA binding; small ribosomal subunit rRNA binding; structural constituent of ribosome; translation regulator activity;
LESREAMVAF	FNSAVASAEEEQAR	Q9HBQ8	Q08379		Putative golgin subfamily A member 2B;	9.469	738	1002	Golgin subfamily A member 2-like protein 1;	Golgi apparatus;
KGKRVVMRVD	FNVPMKNNQITNNQR	P00558			Phosphoglycerate kinase 1;	9.469	23	417	Cell migration-inducing gene 10 protein;Primer recognition protein 2;	cytosol; extracellular exosome; extracellular space; membrane; membrane raft;	canonical glycolysis; cellular response to hypoxia; epithelial cell differentiation; gluconeogenesis; glycolytic process; negative regulation of angiogenesis; phosphorylation; plasminogen activation;	ATP binding; phosphoglycerate kinase activity; protein-disulfide reductase activity;
LLPPGMTIDL	FRGKAAVKDVEEEKFPTQLSR	Q2TAY7			WD40 repeat-containing protein SMU1;	9.469	185	513	Smu-1 suppressor of mec-8 and unc-52 protein homolog;	cytoplasm; nucleus;
VSSRVQSTAF	FSGDQASTDKEEDYIR	Q5TBB1			Ribonuclease H2 subunit B;	9.469	193	312	Aicardi-Goutieres syndrome 2 protein;Deleted in lymphocytic leukemia 8;Ribonuclease HI subunit B;	nucleus; ribonuclease H2 complex;	in utero embryonic development; negative regulation of gene expression; positive regulation of fibroblast proliferation; regulation of DNA damage checkpoint; regulation of G2/M transition of mitotic cell cycle; ribonucleotide metabolic process; RNA catabolic process;	RNA-DNA hybrid ribonuclease activity;
MPNIVL	FSGSSHQDLSQR	P11908			Ribose-phosphate pyrophosphokinase 2;	9.469	5	318	PPRibP;Phosphoribosyl pyrophosphate synthase II;	extracellular exosome; protein complex; ribose phosphate diphosphokinase complex;	5-phosphoribose 1-diphosphate biosynthetic process; AMP biosynthetic process; animal organ regeneration; nucleobase-containing compound metabolic process; nucleoside metabolic process;	ADP binding; AMP binding; ATP binding; carbohydrate binding; GDP binding; identical protein binding; kinase activity; magnesium ion binding; protein homodimerization activity; ribose phosphate diphosphokinase activity;
MDFENL	FSKPPNPALGKTATDSDER	Q8N5P1			Zinc finger CCCH domain-containing protein 8;	9.469	5	291		Cajal body; histone locus body; nuclear body; nucleoplasm; nucleus; transcription elongation factor complex; transcriptionally active chromatin;	apoptotic process; negative regulation of T cell differentiation in thymus; negative regulation of transcription, DNA-templated; positive regulation of thymocyte apoptotic process; positive regulation of transcription from RNA polymerase III promoter; response to antibiotic; snRNA transcription from RNA polymerase II promoter; snRNA transcription from RNA polymerase III promoter; T cell homeostas…	metal ion binding; RNA binding; RNA polymerase II intronic transcription regulatory region sequence-specific DNA binding; sequence-specific DNA binding; transcription factor activity, sequence-specific DNA binding; transcriptional repressor activity, RNA polymerase II transcription regulatory region sequence-specific binding;
AIWRLISNFL	FSNPPPTQTSVR	Q92575			UBX domain-containing protein 4;	9.469	432	508	Erasin;UBX domain-containing protein 2;	cytosol; endoplasmic reticulum; endoplasmic reticulum membrane; nuclear envelope;	response to unfolded protein; ubiquitin-dependent ERAD pathway;
FKEFIEGVSQ	FSVKGDKEQKLR	P63098			Calcineurin subunit B type 1;	9.469	80	170	Protein phosphatase 2B regulatory subunit 1;Protein phosphatase 3 regulatory subunit B alpha isoform 1;	calcineurin complex; cytosol; mitochondrion; nucleoplasm; sarcolemma;	branching involved in blood vessel morphogenesis; calcineurin-NFAT signaling cascade; epithelial to mesenchymal transition; Fc-epsilon receptor signaling pathway; heart development; lung epithelial cell differentiation; myelination in peripheral nervous system; NFAT protein import into nucleus; positive regulation of NFAT protein import into nucleus; positive regulation of protein insertion into …	calcium ion binding; calcium-dependent protein serine/threonine phosphatase activity; calmodulin binding; cyclosporin A binding; protein domain specific binding;
WKSFPSIFKF	FTEASEAKTSSLKPAVTR	Q8WUF8			Protein FAM172A;	9.469	387	416		endoplasmic reticulum; extracellular region;
FKMSHKRIML	FTNEDNPHGNDSAKASR	P12956			X-ray repair cross-complementing protein 6;	9.469	167	609	5'-deoxyribose-5-phosphate lyase Ku70;70 kDa subunit of Ku antigen;ATP-dependent DNA helicase 2 subunit 1;ATP-dependent DNA helicase II 70 kDa subunit;CTC box-binding factor 75 kDa subunit;DNA repair protein XRCC6;Lupus Ku autoantigen protein p70;Thyroid-lupus autoantigen;X-ray repair complementing defective repair in Chinese hamster cells 6;	cytosol; extracellular region; ficolin-1-rich granule lumen; Ku70; membrane; nonhomologous end joining complex; nuclear chromosome, telomeric region; nuclear telomere cap complex; nucleolus; nucleoplasm; nucleus; protein complex; protein-DNA complex; secretory granule lumen; transcription factor complex;	brain development; cellular hyperosmotic salinity response; cellular response to gamma radiation; cellular response to X-ray; DNA ligation; DNA recombination; double-strand break repair via classical nonhomologous end joining; double-strand break repair via nonhomologous end joining; establishment of integrated proviral latency; negative regulation of transcription, DNA-templated; neutrophil degr…	5'-deoxyribose-5-phosphate lyase activity; ATP binding; ATP-dependent DNA helicase activity; damaged DNA binding; DNA binding; double-stranded DNA binding; macromolecular complex binding; protein C-terminus binding; RNA binding; telomeric DNA binding; transcription regulatory region DNA binding;
PVATCPPFSL	FTPHQCPEPKQR	Q9Y4B6			DDB1- and CUL4-associated factor 1 {ECO:0000312|HGNC:HGNC:30911};	9.469	1030	1507	HIV-1 Vpr-binding protein;Serine/threonine-protein kinase VPRBP;Vpr-interacting protein;	cytoplasm; fibrillar center; nucleus;	B cell differentiation; cell competition in a multicellular organism; histone H2A-T120 phosphorylation; negative regulation of transcription from RNA polymerase II promoter; protein ubiquitination; transcription, DNA-templated; V(D)J recombination; viral process;	ATP binding; estrogen receptor binding; histone kinase activity (H2A-T120 specific);
MSQTLPTSNY	FTTVSESLADDSSSR	Q7LBC6			Lysine-specific demethylase 3B;	9.469	538	1761	JmjC domain-containing histone demethylation protein 2B;Jumonji domain-containing protein 1B;Nuclear protein 5qNCA;	chromatin; nucleoplasm; nucleus;	histone H3-K9 demethylation; regulation of transcription, DNA-templated; response to cisplatin; transcription, DNA-templated;	antioxidant activity; chromatin DNA binding; dioxygenase activity; histone demethylase activity; histone demethylase activity (H3-K9 specific); metal ion binding; transcription regulatory region sequence-specific DNA binding;
GKNHKMRIIA	FVGSPVEDNEKDLVKLAKR	P55036			26S proteasome non-ATPase regulatory subunit 4;	9.469	110	377	26S proteasome regulatory subunit RPN10;26S proteasome regulatory subunit S5A;Antisecretory factor 1;Multiubiquitin chain-binding protein;	cytosol; nucleoplasm; nucleus; proteasome accessory complex; proteasome complex; proteasome regulatory particle, base subcomplex;	anaphase-promoting complex-dependent catabolic process; antigen processing and presentation of exogenous peptide antigen via MHC class I, TAP-dependent; Fc-epsilon receptor signaling pathway; MAPK cascade; negative regulation of canonical Wnt signaling pathway; negative regulation of G2/M transition of mitotic cell cycle; negative regulation of ubiquitin-protein ligase activity involved in mitoti…	identical protein binding; polyubiquitin binding; RNA binding;
MAEEQPQVEL	FVKAGSDGAKIGNCPFSQR	O00299			Chloride intracellular channel protein 1;	9.469	9	241	Chloride channel ABP;Nuclear chloride ion channel 27;Regulatory nuclear chloride ion channel protein;	blood microparticle; brush border; chloride channel complex; cytoplasm; extracellular exosome; extracellular space; membrane; mitochondrion; nuclear envelope; nuclear membrane; nucleus; perinuclear region of cytoplasm; plasma membrane; vesicle;	chloride transport; platelet aggregation; positive regulation of osteoblast differentiation; regulation of cell cycle; regulation of mitochondrial membrane potential; signal transduction;	cadherin binding; chloride channel activity; voltage-gated ion channel activity;
FHDMMPKYLN	FVKGVVDSDDLPLNVSR	P14625			Endoplasmin;	9.469	430	803	94 kDa glucose-regulated protein;Heat shock protein 90 kDa beta member 1;Tumor rejection antigen 1;gp96 homolog;	cytosol; endocytic vesicle lumen; endoplasmic reticulum; endoplasmic reticulum chaperone complex; endoplasmic reticulum lumen; endoplasmic reticulum membrane; extracellular exosome; extracellular matrix; extracellular region; focal adhesion; melanosome; membrane; midbody; nucleus; perinuclear region of cytoplasm; plasma membrane;	actin rod assembly; ATF6-mediated unfolded protein response; cellular response to ATP; negative regulation of apoptotic process; protein folding in endoplasmic reticulum; protein transport; receptor-mediated endocytosis; regulation of phosphoprotein phosphatase activity; response to endoplasmic reticulum stress; response to hypoxia; retrograde protein transport, ER to cytosol; sequestering of cal…	ATP binding; calcium ion binding; low-density lipoprotein particle receptor binding; protein phosphatase binding; RNA binding; unfolded protein binding; virion binding;
NSAGLGAADL	FVLPANCGSSDGCEELER	Q8WZA9			Immunity-related GTPase family Q protein;	9.469	144	623				GTP binding;
NTSAPYQLQT	FVLPATPPQLVSPR	P05362			Intercellular adhesion molecule 1;	9.469	210	532	Major group rhinovirus receptor;	cell surface; external side of plasma membrane; extracellular exosome; extracellular space; focal adhesion; immunological synapse; integral component of plasma membrane; membrane; membrane raft; plasma membrane;	acute inflammatory response to antigenic stimulus; adhesion of symbiont to host; cell adhesion; cell adhesion mediated by integrin; cell aging; cellular response to alkaloid; cellular response to dexamethasone stimulus; cellular response to glucose stimulus; cellular response to hypoxia; cellular response to interleukin-1; cellular response to interleukin-6; cellular response to lipopolysaccharid…	integrin binding; receptor activity; transmembrane signaling receptor activity; virus receptor activity;
M	FVQEEKIFAGKVLR	Q9BSL1			Ubiquitin-associated domain-containing protein 1;	9.469	0	405	E3 ubiquitin-protein ligase subunit KPC2;Glialblastoma cell differentiation-related protein 1;Kip1 ubiquitination-promoting complex protein 2;	cytosol; extracellular exosome; Golgi apparatus; plasma membrane;	protein ubiquitination;
TEESIKETER	FVSEMLQKNYSR	Q9Y2T3			Guanine deaminase;	9.469	192	454	Guanine aminohydrolase;p51-nedasin;	cytosol; extracellular exosome; intracellular;	guanine catabolic process; nervous system development; nucleobase-containing compound metabolic process; purine nucleotide catabolic process;	guanine deaminase activity; zinc ion binding;
DIQLSRDMTM	FVTASKDNTAKLFDSTTLEHQKTFR	Q13347			Eukaryotic translation initiation factor 3 subunit I {ECO:0000255|HAMAP-Rule:MF_03008};	9.469	201	325	Eukaryotic translation initiation factor 3 subunit 2 {ECO:0000255|HAMAP-Rule:MF_03008};TGF-beta receptor-interacting protein 1;eIF-3-beta {ECO:0000255|HAMAP-Rule:MF_03008};eIF3 p36 {ECO:0000255|HAMAP-Rule:MF_03008};	cytosol; eukaryotic translation initiation factor 3 complex; eukaryotic translation initiation factor 3 complex, eIF3m; extracellular exosome;	translational initiation;	translation initiation factor activity;
PGKAVPREEL	FVTSKLWNTKHHPEDVEPALR	P14550			Alcohol dehydrogenase [NADP(+)];	9.469	74	325	Aldehyde reductase;Aldo-keto reductase family 1 member A1;	apical plasma membrane; cytosol; extracellular exosome; extracellular space;	aldehyde catabolic process; cellular aldehyde metabolic process; D-glucuronate catabolic process; glucose metabolic process; glucuronate catabolic process to xylulose 5-phosphate; glutathione derivative biosynthetic process; L-ascorbic acid biosynthetic process;	alditol; aldo-keto reductase (NADP) activity; electron carrier activity; L-glucuronate reductase activity;
MALN	GAEVDDFSWEPPTEAETKVLQAR	O60232			Sjoegren syndrome/scleroderma autoantigen 1;	9.469	3	199	Autoantigen p27;		cell division; mitotic nuclear division;	identical protein binding;
MEER	GDSEPTPGCSGLGPGGVR	Q8WW01			tRNA-splicing endonuclease subunit Sen15;	9.469	3	171	SEN15 homolog;tRNA-intron endonuclease Sen15;	nucleolus; nucleoplasm;	mRNA processing; tRNA splicing, via endonucleolytic cleavage and ligation;	tRNA-intron endonuclease activity;
IENAHVLLYL	GDSVTTDHISPAGSIAR	P48200			Iron-responsive element-binding protein 2;	9.469	745	963	Iron regulatory protein 2;	cytoplasm;	cellular iron ion homeostasis; iron ion transport; metabolic process;	4 iron, 4 sulfur cluster binding; iron-responsive element binding; metal ion binding; RNA binding; translation repressor activity;
LGSYAVQAKF	GDYNKEVHKSGYLSSER	P15311			Ezrin;	9.469	133	586	Cytovillin;Villin-2;p81;	actin cytoskeleton; actin filament; apical part of cell; apical plasma membrane; astrocyte projection; basolateral plasma membrane; brush border; cell body; cell periphery; cell projection; cell tip; ciliary basal body; cortical cytoskeleton; cytoplasm; cytoplasmic side of apical plasma membrane; cytosol; endosome; extracellular exosome; extracellular space; extrinsic component of membrane; fibri…	actin cytoskeleton reorganization; actin filament bundle assembly; astral microtubule organization; axon guidance; cellular protein complex localization; cellular response to cAMP; cortical microtubule organization; cytoskeletal anchoring at plasma membrane; establishment of centrosome localization; establishment of endothelial barrier; establishment of protein localization to plasma membrane; es…	actin binding; actin filament binding; ATPase binding; cadherin binding; cell adhesion molecule binding; disordered domain specific binding; microtubule binding; protein C-terminus binding; protein domain specific binding; protein kinase A catalytic subunit binding; protein kinase A regulatory subunit binding; RNA binding; S100 protein binding;
GYESGEYEML	GEGLGVKETPQQKYQR	Q13561			Dynactin subunit 2;	9.469	88	401	50 kDa dynein-associated polypeptide;Dynactin complex 50 kDa subunit;p50 dynamitin;	centrosome; cytoplasm; cytosol; dynactin complex; dynein complex; extracellular exosome; growth cone; kinetochore; membrane; microtubule; vesicle;	antigen processing and presentation of exogenous peptide antigen via MHC class II; cell proliferation; ciliary basal body docking; ER to Golgi vesicle-mediated transport; G2/M transition of mitotic cell cycle; melanosome transport; mitotic nuclear division; mitotic spindle organization; protein localization to centrosome;	identical protein binding; motor activity; spectrin binding;
VMYCKEKLIR	GESEFSFEELR	O43683			Mitotic checkpoint serine/threonine-protein kinase BUB1;	9.469	243	1085	BUB1A;	condensed chromosome kinetochore; condensed nuclear chromosome outer kinetochore; cytosol; kinetochore; membrane; nucleoplasm;	apoptotic process; cell division; cell proliferation; meiotic sister chromatid cohesion, centromeric; mitotic cell cycle checkpoint; mitotic nuclear division; mitotic spindle assembly checkpoint; regulation of chromosome segregation; regulation of sister chromatid cohesion; sister chromatid cohesion; spindle assembly checkpoint; viral process;	ATP binding; protein kinase activity; protein serine/threonine kinase activity;
KGTVRRVVLR	GEVAYIDGQVLVPPGYGQDVR	P27708			CAD protein;	9.469	1788	2225		cell projection; cytosol; extracellular exosome; membrane; neuronal cell body; nuclear matrix; nucleoplasm; nucleus; protein complex; terminal bouton;	'de novo' pyrimidine nucleobase biosynthetic process; 'de novo' UMP biosynthetic process; animal organ regeneration; cellular response to drug; cellular response to epidermal growth factor stimulus; citrulline biosynthetic process; drug metabolic process; female pregnancy; glutamine metabolic process; heart development; lactation; liver development; peptidyl-threonine phosphorylation; protein aut…	aspartate binding; aspartate carbamoyltransferase activity; ATP binding; carbamoyl-phosphate synthase (glutamine-hydrolyzing) activity; dihydroorotase activity; enzyme binding; identical protein binding; protein kinase activity; zinc ion binding;
SRVRTGRSIR	GFCLPPHCSR	P12277			Creatine kinase B-type;	9.469	137	381	B-CK;Creatine kinase B chain;	cytosol; dendrite; extracellular exosome; extracellular space; mitochondrion; myelin sheath; neuronal cell body; nucleus;	cellular chloride ion homeostasis; cerebellum development; creatine metabolic process; substantia nigra development;	ATP binding; creatine kinase activity; ubiquitin protein ligase binding;
ARAVISLMEM	GFDEKEVIDALR	Q9BSL1			Ubiquitin-associated domain-containing protein 1;	9.469	299	405	E3 ubiquitin-protein ligase subunit KPC2;Glialblastoma cell differentiation-related protein 1;Kip1 ubiquitination-promoting complex protein 2;	cytosol; extracellular exosome; Golgi apparatus; plasma membrane;	protein ubiquitination;
GRGGGGGGFR	GFSSGSAVVSGGSR	P35908			Keratin, type II cytoskeletal 2 epidermal;	9.469	19	639	Cytokeratin-2e;Epithelial keratin-2e;Keratin-2 epidermis;Keratin-2e;Type-II keratin Kb2;	cornified envelope; cytosol; extracellular exosome; extracellular space; intermediate filament; keratin filament; membrane; nucleus;	cornification; epidermis development; intermediate filament organization; keratinization; keratinocyte activation; keratinocyte development; keratinocyte migration; keratinocyte proliferation; peptide cross-linking; skin epidermis development;	cytoskeletal protein binding; structural constituent of cytoskeleton; structural constituent of epidermis;
LLHPERFVNL	GIEPPKGVLLFGPPGTGKTLCAR	P35998			26S protease regulatory subunit 7;	9.469	203	433	26S proteasome AAA-ATPase subunit RPT1;Proteasome 26S subunit ATPase 2;Protein MSS1;	cytoplasm; cytosol; cytosolic proteasome complex; extracellular region; ficolin-1-rich granule lumen; membrane; nuclear proteasome complex; nucleoplasm; nucleus; P-body; proteasome accessory complex; proteasome complex; proteasome regulatory particle, base subcomplex; secretory granule lumen;	anaphase-promoting complex-dependent catabolic process; antigen processing and presentation of exogenous peptide antigen via MHC class I, TAP-dependent; Fc-epsilon receptor signaling pathway; MAPK cascade; negative regulation of canonical Wnt signaling pathway; negative regulation of G2/M transition of mitotic cell cycle; negative regulation of ubiquitin-protein ligase activity involved in mitoti…	ATP binding; ATPase activity; proteasome-activating ATPase activity; TBP-class protein binding;
KRLASSVLRC	GKKKVWLDPNETNEIANANSR	P84098			60S ribosomal protein L19;	9.469	16	196	Large ribosomal subunit protein eL19 {ECO:0000303|PubMed:24524803};	cytosol; cytosolic large ribosomal subunit; focal adhesion; membrane;	liver regeneration; nuclear-transcribed mRNA catabolic process, nonsense-mediated decay; rRNA processing; SRP-dependent cotranslational protein targeting to membrane; translation; translational initiation; viral transcription;	5.8S rRNA binding; large ribosomal subunit rRNA binding; RNA binding; structural constituent of ribosome;
KAPAPRPSLL	GLDLLASLKR	Q92620			Pre-mRNA-splicing factor ATP-dependent RNA helicase PRP16;	9.469	48	1227	ATP-dependent RNA helicase DHX38;DEAH box protein 38;	catalytic step 2 spliceosome; cytoplasm; membrane; nucleoplasm; nucleus;	mRNA 3'-end processing; mRNA export from nucleus; mRNA splicing, via spliceosome; RNA export from nucleus; termination of RNA polymerase II transcription;	ATP binding; ATP-dependent RNA helicase activity; RNA binding;
QRGMGYMPKR	GLDVNKCEIAR	Q9ULV4			Coronin-1C;	9.469	322	474	Coronin-3;hCRNN4;	actin cytoskeleton; cytoplasm; flotillin complex; focal adhesion; lamellipodium; lateral plasma membrane;	actin cytoskeleton organization; activation of GTPase activity; establishment of protein localization; negative regulation of epithelial cell migration; negative regulation of focal adhesion assembly; negative regulation of protein kinase activity by regulation of protein phosphorylation; negative regulation of protein phosphorylation; negative regulation of substrate adhesion-dependent cell spre…	actin filament binding; Rac GTPase binding;
YLEDSGHTLR	GLFIIDDKGILR	Q06830	Q13162		Peroxiredoxin-1;	9.469	199	271	Natural killer cell-enhancing factor A;Proliferation-associated gene protein;Thioredoxin peroxidase 2;Thioredoxin-dependent peroxide reductase 2;	cytoplasm; cytosol; extracellular exosome; extracellular matrix; extracellular space; melanosome; mitochondrion; myelin sheath; nucleus;	cell proliferation; cell redox homeostasis; erythrocyte homeostasis; hydrogen peroxide catabolic process; natural killer cell activation; natural killer cell mediated cytotoxicity; regulation of NF-kappaB import into nucleus; regulation of stress-activated MAPK cascade; removal of superoxide radicals; response to reactive oxygen species; retina homeostasis; skeletal system development;	cadherin binding; identical protein binding; peroxidase activity; RNA binding; thioredoxin peroxidase activity;
AVSAAIVKEL	GLNPEKVNIEGGAIALGHPLGASGCR	Q9BWD1			Acetyl-CoA acetyltransferase, cytosolic;	9.469	334	397	Acetyl-CoA transferase-like protein;Cytosolic acetoacetyl-CoA thiolase;	cytoplasm; cytosol; extracellular exosome; mitochondrion; nucleolus; nucleus;	cholesterol biosynthetic process; fatty acid beta-oxidation; lipid metabolic process;	acetyl-CoA C-acetyltransferase activity;
NSQLCKLFIG	GLNVQTSESGLR	Q13151			Heterogeneous nuclear ribonucleoprotein A0;	9.469	11	305		intracellular ribonucleoprotein complex; nucleoplasm; nucleus;	3'-UTR-mediated mRNA stabilization; gene expression; inflammatory response; mRNA processing; mRNA splicing, via spliceosome; response to lipopolysaccharide;	AU-rich element binding; protein kinase binding; RNA binding;
TTALVCDNGS	GLVKAGFAGDDAPR	P68032	P68133		Actin, alpha cardiac muscle 1;	9.469	15	377	Alpha-cardiac actin;	actin filament; actomyosin, actin portion; blood microparticle; cell body; cytoplasm; cytosol; extracellular exosome; extracellular space; filopodium; focal adhesion; I band; lamellipodium; membrane; sarcomere;	actin filament-based movement; actin-myosin filament sliding; actomyosin structure organization; apoptotic process; cardiac muscle contraction; cardiac muscle tissue morphogenesis; cardiac myofibril assembly; heart contraction; mesenchyme migration; muscle filament sliding; negative regulation of apoptotic process; positive regulation of gene expression; response to drug; response to ethanol; ske…	ATP binding; ATPase activity; myosin binding;
SKKDFISVLR	GMDGSTNETASSR	Q9Y3B9			RRP15-like protein;	9.469	214	282	Ribosomal RNA-processing protein 15;	preribosome, large subunit precursor;	maturation of 5.8S rRNA; maturation of LSU-rRNA;
DYSPYGYYGY	GPGYDYSQGSTNYGKSQR	Q99729			Heterogeneous nuclear ribonucleoprotein A/B;	9.469	302	332	APOBEC1-binding protein 1;	cytoplasm; intracellular ribonucleoprotein complex; nucleoplasm; nucleus; RNA polymerase II transcription factor complex;	epithelial to mesenchymal transition; positive regulation of transcription, DNA-templated;	mRNA binding; RNA binding;
YCSSGQGQGR	GQGQSVQMSGAIKQASSETPGCTDR	Q92609			TBC1 domain family member 5;	9.469	683	795		autophagosome; cytosol; endosome membrane; Golgi apparatus; intracellular membrane-bounded organelle; retromer complex;	activation of GTPase activity; autophagy; intracellular protein transport; macroautophagy; positive regulation of receptor internalization; regulation of vesicle fusion; response to starvation; retrograde transport, endosome to Golgi;	AP-2 adaptor complex binding; GTPase activator activity; Rab GTPase binding; retromer complex binding;
PMLQAVAKNR	GQGTYEDYLEGFR	P14649			Myosin light chain 6B;	9.469	137	208	Myosin light chain 1 slow-twitch muscle A isoform;Smooth muscle and nonmuscle myosin light chain alkali 6B;	cytosol; extracellular exosome; muscle myosin complex; myosin complex; unconventional myosin complex;	muscle contraction; muscle filament sliding; skeletal muscle tissue development;	calcium ion binding; motor activity; structural constituent of muscle;
EELPKRRRQR	GSENGNEGSLLER	Q5JSZ5			Protein PRRC2B;	9.469	1150	2229	HLA-B-associated transcript 2-like 1;Proline-rich coiled-coil protein 2B;		cell differentiation;	RNA binding;
LCNLKPQKMR	GVESQGMLLCASIEGINR	P54577			Tyrosine--tRNA ligase, cytoplasmic;	9.469	431	528	Tyrosyl-tRNA synthetase;	aminoacyl-tRNA synthetase multienzyme complex; cytoplasm; cytosol; extracellular space; methionyl glutamyl tRNA synthetase complex; nuclear body;	apoptotic process; tRNA aminoacylation for protein translation; tyrosyl-tRNA aminoacylation;	ATP binding; interleukin-8 receptor binding; RNA binding; signal transducer activity; tRNA binding; tyrosine-tRNA ligase activity;
KLTLDLTVLL	GVLQGQQQSLQQGAHSTGSSR	Q9BQG0			Myb-binding protein 1A;	9.469	1108	1328		cytoplasm; intracellular membrane-bounded organelle; membrane; NLS-dependent protein nuclear import complex; nucleolus; nucleoplasm; nucleus;	cellular response to glucose starvation; circadian regulation of gene expression; intrinsic apoptotic signaling pathway by p53 class mediator; negative regulation of transcription, DNA-templated; nucleocytoplasmic transport; osteoblast differentiation; positive regulation of anoikis; positive regulation of cell cycle arrest; positive regulation of gene expression, epigenetic; regulation of transc…	core promoter binding; DNA-directed DNA polymerase activity; RNA binding; sequence-specific DNA binding; transcription corepressor activity; transcription factor binding;
SEGTLSPNHA	GVSNDTSSLETER	Q96KQ7			Histone-lysine N-methyltransferase EHMT2;	9.469	404	1210	Euchromatic histone-lysine N-methyltransferase 2;HLA-B-associated transcript 8;Histone H3-K9 methyltransferase 3;Lysine N-methyltransferase 1C;Protein G9a;	nuclear chromatin; nuclear speck; nucleoplasm; nucleus;	cellular response to starvation; DNA methylation; histone lysine methylation; histone methylation; negative regulation of transcription from RNA polymerase II promoter; peptidyl-lysine dimethylation; regulation of DNA replication; regulation of signal transduction by p53 class mediator;	C2H2 zinc finger domain binding; histone methyltransferase activity (H3-K27 specific); histone methyltransferase activity (H3-K9 specific); histone-lysine N-methyltransferase activity; p53 binding; promoter-specific chromatin binding; protein-lysine N-methyltransferase activity; zinc ion binding;
SIRWVCSSLR	HAQPTCPGAQLCTVYYASLNFR	P49327			Fatty acid synthase;	9.469	1551	2511		cytosol; extracellular exosome; glycogen granule; Golgi apparatus; melanosome; membrane; mitochondrion; plasma membrane;	acetyl-CoA metabolic process; cellular response to interleukin-4; fatty acid biosynthetic process; fatty acid metabolic process; long-chain fatty-acyl-CoA biosynthetic process; mammary gland development; osteoblast differentiation; pantothenate metabolic process; positive regulation of cellular metabolic process;	3-hydroxyoctanoyl-[acyl-carrier-protein] dehydratase activity; 3-hydroxypalmitoyl-[acyl-carrier-protein] dehydratase activity; 3-oxo-pimeloyl-[acp] methyl ester reductase activity; 3-oxoacyl-[acyl-carrier-protein] reductase (NADPH) activity; 3-oxoacyl-[acyl-carrier-protein] synthase activity; [acyl-carrier-protein] S-acetyltransferase activity; [acyl-carrier-protein] S-malonyltransferase activity…
GEPLYGLDPR	HAVPSATNLCFDVADAGAATR	Q96IR7			4-hydroxyphenylpyruvate dioxygenase-like protein;	9.469	71	371	Glyoxalase domain-containing protein 1;		aromatic amino acid family metabolic process;	dioxygenase activity; metal ion binding; oxidoreductase activity, acting on single donors with incorporation of molecular oxygen;
EVAKERSRAR	HAWLYQAEEEFEKR	Q96DF8			Protein DGCR14;	9.469	176	476	DiGeorge syndrome critical region 13;DiGeorge syndrome critical region 14;DiGeorge syndrome protein H;Protein ES2;	catalytic step 2 spliceosome; nucleus;	mRNA splicing, via spliceosome; nervous system development;
WQAVLQDCIR	HCNNGIPEDSKVEGPAFTDAIR	Q96TA1			Niban-like protein 1;	9.469	191	746	Meg-3;Melanoma invasion by ERK;Protein FAM129B;	adherens junction; cytoplasm; cytosol; extracellular exosome; nucleoplasm; nucleus; plasma membrane;	axon guidance; cell differentiation; gonadotropin secretion; hypomethylation of CpG island; negative regulation of angiogenesis; negative regulation of apoptotic process; negative regulation of cell proliferation; negative regulation of DNA biosynthetic process; negative regulation of Notch signaling pathway; negative regulation of transcription, DNA-templated; negative regulation of vascular end…	cadherin binding; transcription coactivator activity;
KGGQRIKQIR	HESGASIKIDEPLEGSEDR	P61978			Heterogeneous nuclear ribonucleoprotein K;	9.469	413	463	Transformation up-regulated nuclear protein;	catalytic step 2 spliceosome; cell projection; cytoplasm; extracellular exosome; extracellular matrix; focal adhesion; membrane; nuclear chromatin; nucleoplasm; nucleus; podosome;	gene expression; mRNA splicing, via spliceosome; negative regulation of apoptotic process; negative regulation of mRNA splicing, via spliceosome; positive regulation of low-density lipoprotein particle receptor biosynthetic process; positive regulation of receptor-mediated endocytosis; positive regulation of transcription from RNA polymerase II promoter; regulation of intrinsic apoptotic signalin…	cadherin binding; RNA binding; RNA polymerase II core promoter proximal region sequence-specific DNA binding; single-stranded DNA binding; transcriptional activator activity, RNA polymerase II core promoter proximal region sequence-specific binding;
GGCVIQLFSF	HFLGCTECFLYTLMAYDR	Q8NH81			Olfactory receptor 10G6;	9.469	124	332	Olfactory receptor OR11-280;	integral component of membrane; plasma membrane;	G-protein coupled receptor signaling pathway; sensory perception of smell;	G-protein coupled receptor activity; olfactory receptor activity;
KKLVWIPSER	HGFEAASIKEER	P35580			Myosin-10;	9.469	41	1976	Cellular myosin heavy chain, type B;Myosin heavy chain 10;Myosin heavy chain, non-muscle IIb;Non-muscle myosin heavy chain B;Non-muscle myosin heavy chain IIb;	actomyosin; axon; brush border; cell cortex; cleavage furrow; cytoplasm; cytosol; dendritic spine; extracellular exosome; growth cone; lamellipodium; midbody; myosin complex; myosin II complex; myosin II filament; neuromuscular junction; neuronal cell body; nucleus; plasma membrane; spindle; stress fiber;	actin filament-based movement; actomyosin structure organization; adult heart development; aorta development; axon guidance; cardiac myofibril assembly; cardiac septum development; cell adhesion; cell proliferation; cerebellar Purkinje cell layer development; coronary vasculature development; exocytosis; fourth ventricle development; in utero embryonic development; lateral ventricle development; …	actin binding; actin filament binding; actin-dependent ATPase activity; ADP binding; ATP binding; ATPase activity; calmodulin binding; microfilament motor activity;
ISSVSYYTHR	HGNPEEEEWLTAER	Q93008			Probable ubiquitin carboxyl-terminal hydrolase FAF-X;	9.469	370	2570	Deubiquitinating enzyme FAF-X;Fat facets in mammals;Fat facets protein-related, X-linked;Ubiquitin thioesterase FAF-X;Ubiquitin-specific protease 9, X chromosome;Ubiquitin-specific-processing protease FAF-X;	cytoplasm; cytosol; growth cone; membrane;	axon extension; BMP signaling pathway; cell division; cellular protein metabolic process; chromosome segregation; female gamete generation; mitotic nuclear division; negative regulation of transcription from RNA polymerase II promoter; neuron migration; protein deubiquitination; protein ubiquitination; transforming growth factor beta receptor signaling pathway; ubiquitin-dependent protein catabol…	co-SMAD binding; cysteine-type endopeptidase activity; cysteine-type peptidase activity; thiol-dependent ubiquitinyl hydrolase activity;
VKELSEALTR	HGVSHKVDDSSGSIGR	P41250			Glycine--tRNA ligase;	9.469	639	739	Diadenosine tetraphosphate synthetase;Glycyl-tRNA synthetase;	axon; cytoplasm; cytosol; extracellular exosome; mitochondrial matrix; secretory granule;	diadenosine tetraphosphate biosynthetic process; glycyl-tRNA aminoacylation; tRNA aminoacylation for protein translation;	ATP binding; bis(5'-nucleosyl)-tetraphosphatase (asymmetrical) activity; glycine-tRNA ligase activity; protein dimerization activity;
PFQAMVQFHR	HHGQEGSILVTKVEEPSKYGVVVCEADTGR	Q9Y5P6			Mannose-1-phosphate guanyltransferase beta;	9.469	124	360	GDP-mannose pyrophosphorylase B;GTP-mannose-1-phosphate guanylyltransferase beta;	cytoplasm; extracellular exosome; mitochondrion;	GDP-mannose biosynthetic process;	GTP binding; mannose-1-phosphate guanylyltransferase activity;
TKLAIEAGFR	HIDSAHLYNNEEQVGLAIR	Q04828	P42330		Aldo-keto reductase family 1 member C1;	9.469	46	323	20-alpha-hydroxysteroid dehydrogenase;Chlordecone reductase homolog HAKRC;Dihydrodiol dehydrogenase 1/2;High-affinity hepatic bile acid-binding protein;Indanol dehydrogenase;Trans-1,2-dihydrobenzene-1,2-diol dehydrogenase;	cytosol; extracellular exosome;	bile acid and bile salt transport; bile acid metabolic process; cellular response to jasmonic acid stimulus; cholesterol homeostasis; daunorubicin metabolic process; digestion; doxorubicin metabolic process; epithelial cell differentiation; intestinal cholesterol absorption; oxidation-reduction process; progesterone metabolic process; protein homooligomerization; response to organophosphorus; ret…	17-alpha,20-alpha-dihydroxypregn-4-en-3-one dehydrogenase activity; alditol; aldo-keto reductase (NADP) activity; androsterone dehydrogenase (B-specific) activity; bile acid binding; carboxylic acid binding; indanol dehydrogenase activity; ketosteroid monooxygenase activity; oxidoreductase activity, acting on NAD(P)H, quinone or similar compound as acceptor; phenanthrene 9,10-monooxygenase activi…
RPERSELVRM	HILEETSAEPSLQAKQLKLKR	Q969V6			MKL/myocardin-like protein 1;	9.469	41	931	Megakaryoblastic leukemia 1 protein;Megakaryocytic acute leukemia protein;Myocardin-related transcription factor A;	cytoplasm; cytosol; nucleoplasm; nucleus;	positive regulation of transcription from RNA polymerase II promoter; positive regulation of transcription via serum response element binding; smooth muscle cell differentiation;	actin binding; actin monomer binding; leucine zipper domain binding; RNA polymerase II transcription coactivator activity; transcription coactivator activity;
VALGAKVLER	HITLDKTWKGSDHSASLEPGELAELVR	Q9NR45			Sialic acid synthase;	9.469	236	359	N-acetylneuraminate synthase;N-acetylneuraminate-9-phosphate synthase;N-acetylneuraminic acid phosphate synthase;N-acetylneuraminic acid synthase;	cytoplasm; cytosol; extracellular exosome;	carbohydrate biosynthetic process; CMP-N-acetylneuraminate biosynthetic process;	N-acetylneuraminate synthase activity; N-acylneuraminate cytidylyltransferase activity; N-acylneuraminate-9-phosphate synthase activity;
LLLSAVMMLR	HMGLFDHAAR	P50213			Isocitrate dehydrogenase [NAD] subunit alpha, mitochondrial;	9.469	315	366	Isocitric dehydrogenase subunit alpha;NAD(+)-specific ICDH subunit alpha;	mitochondrial matrix; mitochondrion; myelin sheath; nucleus;	carbohydrate metabolic process; tricarboxylic acid cycle;	isocitrate dehydrogenase (NAD+) activity; magnesium ion binding; NAD binding;
KGVVTAEMFR	HMQNSEIIR	Q8N3U4			Cohesin subunit SA-2;	9.469	136	1231	SCC3 homolog 2;Stromal antigen 2;	chromatin; chromosome; chromosome, centromeric region; cytosol; membrane; nucleoplasm; nucleus;	cell division; meiotic cell cycle; mitotic nuclear division; negative regulation of DNA endoreduplication; sister chromatid cohesion;
AGLFSWDEVH	HNDASDLLKR	Q5TG30			Rho GTPase-activating protein 40;	9.469	340	622	Rho-type GTPase-activating protein 40;	cytosol;	regulation of small GTPase mediated signal transduction; signal transduction;	GTPase activator activity;
WNEDTSTLQC	HQFPELEALGVPR	Q9NV12			Transmembrane protein 140;	9.469	63	185		integral component of membrane;
YQIQLLKDLR	HTENEEDKVSSSSFR	Q13057			Bifunctional coenzyme A synthase;	9.469	321	564	NBP;POV-2;	extracellular exosome; mitochondrial matrix; mitochondrial outer membrane;	coenzyme A biosynthetic process; coenzyme biosynthetic process;	ATP binding; dephospho-CoA kinase activity; pantetheine-phosphate adenylyltransferase activity;
SARIEDMRKR	HVEVSQAPLPPAPAYLSSPLALPSQR	Q9Y6K9			NF-kappa-B essential modulator;	9.469	358	419	FIP-3;IkB kinase-associated protein 1;Inhibitor of nuclear factor kappa-B kinase subunit gamma;NF-kappa-B essential modifier;	cytoplasm; cytosol; IkappaB kinase complex; intracellular; mitotic spindle; nucleus; spindle pole; ubiquitin ligase complex;	activation of MAPK activity; anoikis; antigen processing and presentation of exogenous peptide antigen via MHC class I, TAP-dependent; apoptotic process; cellular response to DNA damage stimulus; establishment of vesicle localization; Fc-epsilon receptor signaling pathway; I-kappaB kinase/NF-kappaB signaling; immune response; inflammatory response; innate immune response; JNK cascade; negative re…	K63-linked polyubiquitin binding; linear polyubiquitin binding; metal ion binding; peroxisome proliferator activated receptor binding; protein domain specific binding; protein heterodimerization activity; protein homodimerization activity; signal transducer activity; ubiquitin protein ligase binding;
SNKRLFNVDR	HVGMAVAGLLADAR	P25788			Proteasome subunit alpha type-3;	9.469	71	255	Macropain subunit C8;Multicatalytic endopeptidase complex subunit C8;Proteasome component C8;	cytoplasm; cytosol; extracellular exosome; nucleoplasm; nucleus; proteasome complex; proteasome core complex; proteasome core complex, alpha-subunit complex; synapse;	anaphase-promoting complex-dependent catabolic process; antigen processing and presentation of exogenous peptide antigen via MHC class I, TAP-dependent; Fc-epsilon receptor signaling pathway; MAPK cascade; negative regulation of canonical Wnt signaling pathway; negative regulation of G2/M transition of mitotic cell cycle; negative regulation of ubiquitin-protein ligase activity involved in mitoti…	threonine-type endopeptidase activity;
PPPVYEPVSY	HVQESLQDEGAEPTGYSAELSSEGIR	P15311			Ezrin;	9.469	482	586	Cytovillin;Villin-2;p81;	actin cytoskeleton; actin filament; apical part of cell; apical plasma membrane; astrocyte projection; basolateral plasma membrane; brush border; cell body; cell periphery; cell projection; cell tip; ciliary basal body; cortical cytoskeleton; cytoplasm; cytoplasmic side of apical plasma membrane; cytosol; endosome; extracellular exosome; extracellular space; extrinsic component of membrane; fibri…	actin cytoskeleton reorganization; actin filament bundle assembly; astral microtubule organization; axon guidance; cellular protein complex localization; cellular response to cAMP; cortical microtubule organization; cytoskeletal anchoring at plasma membrane; establishment of centrosome localization; establishment of endothelial barrier; establishment of protein localization to plasma membrane; es…	actin binding; actin filament binding; ATPase binding; cadherin binding; cell adhesion molecule binding; disordered domain specific binding; microtubule binding; protein C-terminus binding; protein domain specific binding; protein kinase A catalytic subunit binding; protein kinase A regulatory subunit binding; RNA binding; S100 protein binding;
PMRMVTVPPR	HYCTVANPVSR	Q14764			Major vault protein;	9.469	55	893	Lung resistance-related protein;	cytoplasm; cytoskeleton; cytosol; extracellular exosome; extracellular region; ficolin-1-rich granule lumen; intracellular ribonucleoprotein complex; membrane; nuclear pore; nucleus; perinuclear region of cytoplasm; secretory granule lumen;	ERBB signaling pathway; mRNA transport; negative regulation of protein autophosphorylation; negative regulation of protein tyrosine kinase activity; negative regulation of signaling; neutrophil degranulation; protein transport;	identical protein binding; protein kinase binding; protein phosphatase binding;
FHLLKLYSDR	HYDLNQLLEPR	P52948			Nuclear pore complex protein Nup98-Nup96;	9.469	1501	1817		cytosol; intracellular membrane-bounded organelle; nuclear envelope; nuclear inclusion body; nuclear membrane; nuclear periphery; nuclear pore; nuclear pore cytoplasmic filaments; nuclear pore nuclear basket; nuclear pore outer ring; nucleoplasm;	DNA replication; gene silencing by RNA; intracellular transport of virus; mitotic nuclear envelope disassembly; mRNA export from nucleus; nuclear pore complex assembly; nuclear pore organization; nucleocytoplasmic transport; posttranscriptional tethering of RNA polymerase II gene DNA at nuclear periphery; protein import into nucleus; protein sumoylation; regulation of cellular response to heat; r…	nuclear localization sequence binding; nucleocytoplasmic transporter activity; RNA binding; structural constituent of nuclear pore; transporter activity;
GLPLHRGCLL	IAEMSSTGSLATGDYTR	P11172			Uridine 5'-monophosphate synthase;	9.469	366	480		cytoplasm; cytosol; nucleus;	'de novo' pyrimidine nucleobase biosynthetic process; 'de novo' UMP biosynthetic process; cellular response to drug; female pregnancy; lactation; pyrimidine nucleoside biosynthetic process; UMP biosynthetic process;	orotate phosphoribosyltransferase activity; orotidine-5'-phosphate decarboxylase activity;
RSRSGSIVEL	IAGGGSSCSPVLSR	P42858			Huntingtin;	9.469	422	3142	Huntington disease protein;	autophagosome; axon; centriole; cytoplasm; cytoplasmic vesicle membrane; cytosol; dendrite; endoplasmic reticulum; Golgi apparatus; inclusion body; late endosome; nucleoplasm; nucleus; perinuclear region of cytoplasm; protein complex;	animal organ development; apoptotic process; establishment of mitotic spindle orientation; Golgi organization; negative regulation of extrinsic apoptotic signaling pathway; positive regulation of aggrephagy; positive regulation of apoptotic process; positive regulation of cilium assembly; positive regulation of inositol 1,4,5-trisphosphate-sensitive calcium-release channel activity; positive regu…	beta-tubulin binding; dynactin binding; dynein intermediate chain binding; heat shock protein binding; identical protein binding; ion channel binding; kinase binding; p53 binding; profilin binding; transcription factor binding;
VSCIRATGSY	IAGTNGNSNGLVPMLR	P23921			Ribonucleoside-diphosphate reductase large subunit;	9.469	260	792	Ribonucleoside-diphosphate reductase subunit M1;Ribonucleotide reductase large subunit;	cell projection; cytosol; extracellular exosome; neuronal cell body; nuclear envelope; ribonucleoside-diphosphate reductase complex;	cell proliferation in forebrain; deoxyribonucleotide biosynthetic process; DNA replication; male gonad development; mitotic cell cycle; nucleobase-containing small molecule interconversion; protein heterotetramerization; pyrimidine nucleobase metabolic process; response to ionizing radiation; retina development in camera-type eye;	ATP binding; disordered domain specific binding; ribonucleoside-diphosphate reductase activity, thioredoxin disulfide as acceptor;
DWKVMNILHR	IASQVAALDLGYKPGVEAIR	P28331			NADH-ubiquinone oxidoreductase 75 kDa subunit, mitochondrial;	9.469	517	727	Complex I-75kD;	mitochondrial intermembrane space; mitochondrial matrix; mitochondrial respiratory chain complex I; mitochondrion; myelin sheath;	apoptotic mitochondrial changes; ATP metabolic process; cellular respiration; mitochondrial electron transport, NADH to ubiquinone; mitochondrial respiratory chain complex I assembly; reactive oxygen species metabolic process; regulation of mitochondrial membrane potential;	2 iron, 2 sulfur cluster binding; 4 iron, 4 sulfur cluster binding; electron carrier activity; metal ion binding; NADH dehydrogenase (ubiquinone) activity;
LPLTDAELAR	IATSLDGFDVASVQQQR	O60664			Perilipin-3;	9.469	212	434	47 kDa mannose 6-phosphate receptor-binding protein;Cargo selection protein TIP47;Mannose-6-phosphate receptor-binding protein 1;Placental protein 17;	cytoplasm; cytosol; endosome; endosome membrane; Golgi apparatus; lipid particle; membrane; transport vesicle;	vesicle-mediated transport;	cadherin binding;
NGKFLDPKNR	ICFKFDHLR	P47755			F-actin-capping protein subunit alpha-2;	9.469	92	286	CapZ alpha-2;	actin cytoskeleton; brush border; cortical cytoskeleton; cytosol; extracellular exosome; extracellular region; F-actin capping protein complex; membrane;	barbed-end actin filament capping; blood coagulation; innate immune response; movement of cell or subcellular component; protein complex assembly;	actin binding;
GPGKGRFLVR	ICFQGDEGACPTR	Q9NUD5			Zinc finger CCHC domain-containing protein 3;	9.469	168	404				RNA binding; zinc ion binding;
SFKHLIGQVM	IDKNPGITSAVNKINNIDNMYR	Q32P41			tRNA (guanine(37)-N1)-methyltransferase {ECO:0000255|HAMAP-Rule:MF_03152};	9.469	225	509	M1G-methyltransferase {ECO:0000255|HAMAP-Rule:MF_03152};tRNA [GM37] methyltransferase {ECO:0000255|HAMAP-Rule:MF_03152};tRNA methyltransferase 5 homolog {ECO:0000255|HAMAP-Rule:MF_03152};	mitochondrial matrix; nucleus;	mitochondrial tRNA methylation;	tRNA (guanine(37)-N(1))-methyltransferase activity;
ETEINFTQKL	IDLEHLLFER	Q8IYW5			E3 ubiquitin-protein ligase RNF168 {ECO:0000255|HAMAP-Rule:MF_03066};	9.469	428	571	RING finger protein 168 {ECO:0000255|HAMAP-Rule:MF_03066};RING-type E3 ubiquitin transferase RNF168;	cytosol; nucleoplasm; nucleus; protein complex; site of double-strand break; ubiquitin ligase complex;	cellular response to DNA damage stimulus; double-strand break repair; double-strand break repair via nonhomologous end joining; histone H2A K63-linked ubiquitination; histone H2A monoubiquitination; histone H2A-K13 ubiquitination; histone H2A-K15 ubiquitination; interstrand cross-link repair; isotype switching; negative regulation of transcription elongation from RNA polymerase II promoter; posit…	chromatin binding; histone binding; K63-linked polyubiquitin binding; nucleosome binding; ubiquitin binding; ubiquitin-protein transferase activity; zinc ion binding;
FVPNDGCLNF	IEENDEVLVAGFGR	P62266			40S ribosomal protein S23;	9.469	92	143	Small ribosomal subunit protein uS12 {ECO:0000303|PubMed:24524803};	cytosol; cytosolic small ribosomal subunit; membrane; nucleoplasm; ribosome;	nuclear-transcribed mRNA catabolic process, nonsense-mediated decay; rRNA processing; SRP-dependent cotranslational protein targeting to membrane; translation; translational initiation; viral transcription;	RNA binding; structural constituent of ribosome;
GNGEVDFKEF	IEGVSQFSVKGDKEQKLR	P63098			Calcineurin subunit B type 1;	9.469	74	170	Protein phosphatase 2B regulatory subunit 1;Protein phosphatase 3 regulatory subunit B alpha isoform 1;	calcineurin complex; cytosol; mitochondrion; nucleoplasm; sarcolemma;	branching involved in blood vessel morphogenesis; calcineurin-NFAT signaling cascade; epithelial to mesenchymal transition; Fc-epsilon receptor signaling pathway; heart development; lung epithelial cell differentiation; myelination in peripheral nervous system; NFAT protein import into nucleus; positive regulation of NFAT protein import into nucleus; positive regulation of protein insertion into …	calcium ion binding; calcium-dependent protein serine/threonine phosphatase activity; calmodulin binding; cyclosporin A binding; protein domain specific binding;
NLFASDMQSL	IENAEMSTESYDQGKDR	Q13823			Nucleolar GTP-binding protein 2;	9.469	162	731	Autoantigen NGP-1;	membrane; nucleolus; nucleus;	ribosome biogenesis;	GTP binding; GTPase activity; RNA binding;
LLLAARAIVA	IENPADVSVISSR	P08865			40S ribosomal protein SA {ECO:0000255|HAMAP-Rule:MF_03016};	9.469	66	295	37 kDa laminin receptor precursor {ECO:0000255|HAMAP-Rule:MF_03016};37/67 kDa laminin receptor {ECO:0000255|HAMAP-Rule:MF_03016};67 kDa laminin receptor {ECO:0000255|HAMAP-Rule:MF_03016};Colon carcinoma laminin-binding protein;Laminin receptor 1 {ECO:0000255|HAMAP-Rule:MF_03016};Laminin-binding protein precursor p40 {ECO:0000255|HAMAP-Rule:MF_03016};Multidrug resistance-associated protein MGr1-Ag…	90S preribosome; cytoplasm; cytosol; cytosolic small ribosomal subunit; extracellular exosome; membrane; nucleoplasm; nucleus; plasma membrane;	cell adhesion; endonucleolytic cleavage in ITS1 to separate SSU-rRNA from 5.8S rRNA and LSU-rRNA from tricistronic rRNA transcript (SSU-rRNA, 5.8S rRNA, LSU-rRNA); endonucleolytic cleavage to generate mature 3'-end of SSU-rRNA from (SSU-rRNA, 5.8S rRNA, LSU-rRNA); nuclear-transcribed mRNA catabolic process, nonsense-mediated decay; ribosomal small subunit assembly; rRNA export from nucleus; rRNA …	laminin receptor activity; ribosome binding; RNA binding; structural constituent of ribosome; virus receptor activity;
FRAQLLPKAM	IEVEDFVDPNGKISLQR	Q92538			Golgi-specific brefeldin A-resistance guanine nucleotide exchange factor 1;	9.469	1046	1859		cell leading edge; cis-Golgi network; cytosol; endoplasmic reticulum lumen; endoplasmic reticulum-Golgi intermediate compartment; Golgi apparatus; Golgi membrane; Golgi stack; lipid particle; membrane; mitochondrion; peroxisome; trans-Golgi network;	cell activation involved in immune response; COPI coating of Golgi vesicle; endoplasmic reticulum-Golgi intermediate compartment organization; ER to Golgi vesicle-mediated transport; establishment of monopolar cell polarity; Golgi disassembly; Golgi organization; Golgi to endosome transport; neutrophil chemotaxis; post-Golgi vesicle-mediated transport; protein localization to endoplasmic reticulu…	ARF guanyl-nucleotide exchange factor activity; guanyl-nucleotide exchange factor activity; phosphatidylinositol-3,4,5-trisphosphate binding; phosphatidylinositol-3,5-bisphosphate binding;
LDQAIGLLVA	IFHKYSGR	P06703			Protein S100-A6;	9.469	13	90	Calcyclin;Growth factor-inducible protein 2A9;MLN 4;Prolactin receptor-associated protein;S100 calcium-binding protein A6;	cytoplasm; cytosol; extracellular exosome; extrinsic component of cytoplasmic side of plasma membrane; nuclear envelope; nucleus; perinuclear region of cytoplasm; ruffle;	axonogenesis; positive regulation of fibroblast proliferation; signal transduction;	calcium ion binding; calcium-dependent protein binding; ion transmembrane transporter activity; protein homodimerization activity; S100 protein binding; tropomyosin binding; zinc ion binding;
FPPPPLPDSA	IFLPPSLDPLPGPVVR	O15357			Phosphatidylinositol 3,4,5-trisphosphate 5-phosphatase 2;	9.469	1061	1258	Inositol polyphosphate phosphatase-like protein 1;Protein 51C;SH2 domain-containing inositol 5'-phosphatase 2;	cytoskeleton; cytosol; filopodium; Golgi apparatus; lamellipodium; plasma membrane;	actin filament organization; cell adhesion; endochondral ossification; endocytosis; glucose metabolic process; immune system process; inositol phosphate metabolic process; negative regulation of cell proliferation; negative regulation of gene expression; phosphatidylinositol biosynthetic process; phosphatidylinositol dephosphorylation; post-embryonic development; response to insulin; ruffle assem…	actin binding; inositol-1,3,4,5-tetrakisphosphate 5-phosphatase activity; phosphatidylinositol-3,4,5-trisphosphate 5-phosphatase activity; SH2 domain binding; SH3 domain binding;
DRIAQLICER	IFYPEIEEVQALDDTER	P33316			Deoxyuridine 5'-triphosphate nucleotidohydrolase, mitochondrial;	9.469	223	252	dUTP pyrophosphatase;	extracellular exosome; mitochondrion; nucleoplasm; nucleus;	DNA replication; dUMP biosynthetic process; dUTP metabolic process; nucleobase-containing compound metabolic process; pyrimidine nucleoside biosynthetic process;	dUTP diphosphatase activity; RNA binding;
EYDYLFKVVL	IGDSGVGKSNLLSR	P62491	Q15907		Ras-related protein Rab-11A;	9.469	15	218	YL8;	axon; cleavage furrow; cytoplasmic vesicle; cytoplasmic vesicle membrane; cytosol; extracellular exosome; Golgi apparatus; mitochondrion; multivesicular body; perinuclear region of cytoplasm; phagocytic vesicle; plasma membrane; protein complex; recycling endosome; recycling endosome membrane; spindle pole; trans-Golgi network; transport vesicle; vesicle;	astral microtubule organization; ciliary basal body docking; cytokinesis; establishment of protein localization to membrane; establishment of protein localization to organelle; establishment of vesicle localization; exosomal secretion; melanosome transport; membrane organization; mitotic metaphase plate congression; mitotic spindle assembly; multivesicular body assembly; neuron projection develop…	GTP binding; GTPase activity; microtubule binding; myosin V binding; syntaxin binding;
MENSQLCKLF	IGGLNVQTSESGLR	Q13151			Heterogeneous nuclear ribonucleoprotein A0;	9.469	9	305		intracellular ribonucleoprotein complex; nucleoplasm; nucleus;	3'-UTR-mediated mRNA stabilization; gene expression; inflammatory response; mRNA processing; mRNA splicing, via spliceosome; response to lipopolysaccharide;	AU-rich element binding; protein kinase binding; RNA binding;
HKSVMEELKR	IIDDSEITKEDDALWPPPDR	P61326	Q96A72		Protein mago nashi homolog;	9.469	63	148		catalytic step 2 spliceosome; cytoplasm; exon-exon junction complex; nuclear speck; nucleoplasm; nucleus;	mRNA 3'-end processing; mRNA export from nucleus; mRNA splicing, via spliceosome; nuclear-transcribed mRNA catabolic process, nonsense-mediated decay; regulation of alternative mRNA splicing, via spliceosome; regulation of translation; RNA export from nucleus; termination of RNA polymerase II transcription;	RNA binding;
QTAIKSELLM	IIQMETQSSMR	O00410			Importin-5;	9.469	94	1097	Importin subunit beta-3;Karyopherin beta-3;Ran-binding protein 5;	cytoplasm; membrane; nuclear membrane; nuclear periphery; nuclear pore; nucleolus; nucleus;	cellular response to amino acid stimulus; NLS-bearing protein import into nucleus; positive regulation of protein import into nucleus; protein import into nucleus, translocation; ribosomal protein import into nucleus; viral process;	GTPase inhibitor activity; nuclear localization sequence binding; protein transporter activity; Ran GTPase binding; RNA binding;
SNFALLVENR	IKEEMEAFPEK	Q5JS54			Proteasome assembly chaperone 4;	9.469	110	123			proteasome assembly;
KEHLRDFLVQ	IKEFAGEDTSDLFLEER	O14980			Exportin-1;	9.469	1020	1071	Chromosome region maintenance 1 protein homolog;	annulate lamellae; Cajal body; cytoplasm; cytosol; intracellular membrane-bounded organelle; intracellular ribonucleoprotein complex; kinetochore; membrane; nuclear envelope; nuclear membrane; nucleolus; nucleoplasm; nucleus;	intracellular transport of virus; mRNA transport; negative regulation of transcription from RNA polymerase II promoter; protein export from nucleus; protein localization to nucleus; regulation of centrosome duplication; regulation of mRNA stability; regulation of protein catabolic process; regulation of protein export from nucleus; response to drug; ribosomal large subunit export from nucleus; ri…	nuclear export signal receptor activity; nucleocytoplasmic transporter activity; protein domain specific binding; Ran GTPase binding; RNA binding; transporter activity;
NMTHLEAQNR	IKGCTDNLTLTVAR	O00151			PDZ and LIM domain protein 1;	9.469	68	329	C-terminal LIM domain protein 1;Elfin;LIM domain protein CLP-36;	cell-cell adherens junction; cytoplasm; cytoskeleton; focal adhesion; transcription factor complex;	regulation of transcription, DNA-templated; response to hypoxia; response to oxidative stress;	cadherin binding involved in cell-cell adhesion; transcription coactivator activity; zinc ion binding;
NEIRQMSGAQ	IKIANPVEGSTDR	Q15366			Poly(rC)-binding protein 2;	9.469	319	365	Alpha-CP2;Heterogeneous nuclear ribonucleoprotein E2;	cytoplasm; cytosol; extracellular exosome; focal adhesion; intracellular ribonucleoprotein complex; membrane; nucleoplasm; nucleus;	defense response to virus; gene expression; innate immune response; IRES-dependent viral translational initiation; mRNA metabolic process; mRNA splicing, via spliceosome; negative regulation of defense response to virus; negative regulation of type I interferon production; proteasome-mediated ubiquitin-dependent protein catabolic process; viral RNA genome replication;	C-rich single-stranded DNA binding; enzyme binding; RNA binding; ubiquitin protein ligase binding;
EAFNTQVTAL	IKLKECEDTHLGEEVDR	O43847			Nardilysin;	9.469	1019	1150	N-arginine dibasic convertase;Nardilysin convertase {ECO:0000312|HGNC:HGNC:7995};	cell surface; cytosol; mitochondrion;	cell migration; cell proliferation; neuromuscular junction development; positive regulation of membrane protein ectodomain proteolysis; proteolysis; regulation of endopeptidase activity;	epidermal growth factor binding; metal ion binding; metalloendopeptidase activity;
GNLNTYKRLA	IKLPDDQIPKTNCNVAVINVGAPAAGMNAAVR	Q01813			ATP-dependent 6-phosphofructokinase, platelet type {ECO:0000255|HAMAP-Rule:MF_03184};	9.469	397	784	6-phosphofructokinase type C;Phosphofructo-1-kinase isozyme C;Phosphohexokinase {ECO:0000255|HAMAP-Rule:MF_03184};	cytoplasm; cytosol; extracellular exosome; extracellular matrix; membrane; nucleus;	canonical glycolysis; fructose 6-phosphate metabolic process;	6-phosphofructokinase activity; ATP binding; cadherin binding; metal ion binding; protein complex binding;
RDFLQRLDLQ	IKLSTQAAKKLKEESR	Q8IV50			LysM and putative peptidoglycan-binding domain-containing protein 2;	9.469	185	215
ADYAIKIMNM	IKLYGKPIR	Q15427			Splicing factor 3B subunit 4;	9.469	75	424	Pre-mRNA-splicing factor SF3b 49 kDa subunit;SF3b50;Spliceosome-associated protein 49;	nucleoplasm; spliceosomal complex; U12-type spliceosomal complex;	mRNA processing; mRNA splicing, via spliceosome; positive regulation of mRNA splicing, via spliceosome; RNA splicing; RNA splicing, via transesterification reactions;	RNA binding;
DAGEMVRQAR	ILAQATSDLVNAIKADAEGESDLENSR	Q9Y490			Talin-1;	9.469	826	2541		cell surface; cell-cell junction; cytoskeleton; cytosol; extracellular exosome; extracellular region; focal adhesion; ruffle; ruffle membrane;	cell-cell junction assembly; cell-substrate junction assembly; cortical actin cytoskeleton organization; cytoskeletal anchoring at plasma membrane; integrin activation; integrin-mediated signaling pathway; IRE1-mediated unfolded protein response; movement of cell or subcellular component; muscle contraction; platelet aggregation; platelet degranulation; viral process;	actin filament binding; cadherin binding; integrin binding; LIM domain binding; phosphatidylinositol binding; phosphatidylserine binding; structural constituent of cytoskeleton; vinculin binding;
GRKEILFYDR	ILCDVPCSGDGTMR	Q08J23			tRNA (cytosine(34)-C(5))-methyltransferase;	9.469	263	767	Myc-induced SUN domain-containing protein;NOL1/NOP2/Sun domain family member 2;Substrate of AIM1/Aurora kinase B;tRNA (cytosine-5-)-methyltransferase;tRNA methyltransferase 4 homolog;	chromatoid body; cytoplasm; nucleolus; nucleoplasm; spindle;	cell division; hair follicle maturation; meiotic cell cycle checkpoint; mitotic nuclear division; spermatid development; tRNA methylation; tRNA modification;	RNA binding; tRNA (cytosine-5-)-methyltransferase activity; tRNA binding;
RPQPVDKLEK	ILEKLLTR	Q8ND24	Q9UEW8		RING finger protein 214;	9.469	556	703				zinc ion binding;
VEEVDGSLVR	ILFLDDKR	Q15047			Histone-lysine N-methyltransferase SETDB1;	9.469	375	1291	ERG-associated protein with SET domain;Histone H3-K9 methyltransferase 4;Lysine N-methyltransferase 1E;SET domain bifurcated 1;	chromosome; cytosol; intracellular membrane-bounded organelle; nucleoplasm; nucleus; plasma membrane;	positive regulation of methylation-dependent chromatin silencing; Ras protein signal transduction; response to ethanol; response to vitamin; transcription, DNA-templated;	chromatin binding; DNA binding; histone-lysine N-methyltransferase activity; promoter-specific chromatin binding; zinc ion binding;
RRDNNELLLF	ILKQLVAEQVTYQR	P49736			DNA replication licensing factor MCM2;	9.469	833	904	Minichromosome maintenance protein 2 homolog;Nuclear protein BM28;	chromatin; cytoplasm; cytosol; MCM complex; microtubule cytoskeleton; nuclear chromosome, telomeric region; nuclear origin of replication recognition complex; nucleoplasm; nucleus;	apoptotic process; cellular response to interleukin-4; cochlea development; DNA replication; DNA replication initiation; DNA unwinding involved in DNA replication; G1/S transition of mitotic cell cycle; nucleosome assembly;	ATP binding; DNA binding; DNA helicase activity; DNA replication origin binding; enzyme binding; histone binding; metal ion binding;
LIQYNRRQLL	ILLQNCTDEGER	Q969H6			Ribonuclease P/MRP protein subunit POP5;	9.469	122	163		nucleolar ribonuclease P complex; nucleoplasm;	tRNA 5'-leader removal;	ribonuclease P activity;
HKMAMDGYRR	ILNLLSPSDGER	Q9Y5Q9			General transcription factor 3C polypeptide 3;	9.469	275	886	Transcription factor IIIC 102 kDa subunit;Transcription factor IIIC subunit gamma;	nuclear membrane; nucleolus; nucleoplasm; nucleus; transcription factor TFIIIC complex;	5S class rRNA transcription from RNA polymerase III type 1 promoter; regulation of transcription from RNA polymerase III promoter; transcription from RNA polymerase III promoter; transcription, DNA-templated; tRNA transcription from RNA polymerase III promoter;	DNA binding;
TRRPVTCKIR	ILPSLEDTLSLVKR	Q9NX74			tRNA-dihydrouridine(20) synthase [NAD(P)+]-like;	9.469	156	493	Dihydrouridine synthase 2;Up-regulated in lung cancer protein 8;tRNA-dihydrouridine synthase 2-like;	cytosol; endoplasmic reticulum; mitochondrion;	negative regulation of cell death;	double-stranded RNA binding; flavin adenine dinucleotide binding; protein kinase inhibitor activity; tRNA dihydrouridine synthase activity;
GVRVNNRFEL	INIDDLEDDPVVNGER	Q9BQ70			Transcription factor 25;	9.469	63	676	Nuclear localized protein 1;	nucleus;	heart development; negative regulation of transcription from RNA polymerase II promoter; transcription, DNA-templated;	DNA binding; transcription factor activity, sequence-specific DNA binding;
IRREKTQNFL	IQKITDEVLKLR	O95999			B-cell lymphoma/leukemia 10;	9.469	94	233	B-cell CLL/lymphoma 10;CARD-containing molecule enhancing NF-kappa-B;CARD-like apoptotic protein;CED-3/ICH-1 prodomain homologous E10-like regulator;Cellular homolog of vCARMEN;Cellular-E10;Mammalian CARD-containing adapter molecule E10;	CBM complex; cytoplasm; cytoplasmic microtubule; cytosol; immunological synapse; lysosome; membrane raft; nucleus; perinuclear region of cytoplasm; plasma membrane; protein complex;	adaptive immune response; B cell apoptotic process; cell death; cellular defense response; cellular response to mechanical stimulus; Fc-epsilon receptor signaling pathway; I-kappaB kinase/NF-kappaB signaling; immunoglobulin mediated immune response; innate immune response; interleukin-6 biosynthetic process; lymphotoxin A biosynthetic process; negative regulation of mature B cell apoptotic proces…	enzyme binding; identical protein binding; kinase binding; NF-kappaB binding; protease binding; protein C-terminus binding; protein kinase B binding; protein kinase binding; protein self-association; transcription coactivator activity; transcription factor binding; ubiquitin binding; ubiquitin protein ligase binding;
NLYNTVFWAL	IQQSGLTPVQAQGR	Q9NWX6			Probable tRNA(His) guanylyltransferase;	9.469	192	298	Interphase cytoplasmic foci protein 45;tRNA-histidine guanylyltransferase;	cytosol; mitochondrion;	protein homotetramerization; tRNA modification; tRNA processing;	ATP binding; GTP binding; identical protein binding; magnesium ion binding; nucleotidyltransferase activity; tRNA binding; tRNA guanylyltransferase activity;
DECPKPELLA	IRFLNAENAQKFKTKFEECR	P43487			Ran-specific GTPase-activating protein;	9.469	138	201	Ran-binding protein 1;	centrosome; cytoplasm; cytosol; nuclear envelope; nucleus;	G1/S transition of mitotic cell cycle; positive regulation of mitotic centrosome separation; protein import into nucleus; RNA export from nucleus; signal transduction; spindle organization; ubiquitin-dependent protein catabolic process; viral process;	cadherin binding; GDP-dissociation inhibitor activity; GTPase activator activity; Ran GTPase binding;
NAVVNDFWAE	ISESVDKIEVLYEDEGFR	Q99460			26S proteasome non-ATPase regulatory subunit 1;	9.469	36	953	26S proteasome regulatory subunit RPN2;26S proteasome regulatory subunit S1;26S proteasome subunit p112;	azurophil granule lumen; cytosol; extracellular exosome; extracellular region; membrane; nucleoplasm; proteasome accessory complex; proteasome complex; proteasome regulatory particle;	anaphase-promoting complex-dependent catabolic process; antigen processing and presentation of exogenous peptide antigen via MHC class I, TAP-dependent; Fc-epsilon receptor signaling pathway; MAPK cascade; negative regulation of canonical Wnt signaling pathway; negative regulation of G2/M transition of mitotic cell cycle; negative regulation of ubiquitin-protein ligase activity involved in mitoti…	enzyme regulator activity;
ASLSTFQQMW	ISKQEYDESGPSIVHR	P60709	Q9BYX7	P63261	Actin, cytoplasmic 1;	9.469	1055	1075	Beta-actin;	blood microparticle; cortical cytoskeleton; cytoplasm; cytoplasmic ribonucleoprotein granule; cytoskeleton; cytosol; dense body; extracellular exosome; extracellular space; focal adhesion; intracellular ribonucleoprotein complex; membrane; myelin sheath; NuA4 histone acetyltransferase complex; nuclear chromatin; nucleoplasm; plasma membrane; protein complex; vesicle;	ATP-dependent chromatin remodeling; cell junction assembly; ephrin receptor signaling pathway; Fc-gamma receptor signaling pathway involved in phagocytosis; membrane organization; movement of cell or subcellular component; platelet aggregation; positive regulation of gene expression, epigenetic; postsynaptic actin cytoskeleton organization; protein deubiquitination; retina homeostasis; substantia…	ATP binding; identical protein binding; kinesin binding; nitric-oxide synthase binding; structural constituent of cytoskeleton; structural constituent of postsynaptic actin cytoskeleton; Tat protein binding;
ASLGTFQQMW	ISKQEYEEGGKQCVER	O94805	O96019		Actin-like protein 6B;	9.469	409	429	53 kDa BRG1-associated factor B;Actin-related protein Baf53b;ArpNalpha;BRG1-associated factor 53B;	nBAF complex; nucleolus; nucleus; SWI/SNF complex;	chromatin organization; chromatin remodeling; covalent chromatin modification; regulation of transcription from RNA polymerase II promoter; spinal cord development; transcription, DNA-templated;	structural constituent of cytoskeleton; transcription coactivator activity;
ENSRTCMIAT	ISPGMASCENTLNTLR	O00139			Kinesin-like protein KIF2A;	9.469	528	706	Kinesin-2;	centrosome; cytosol; kinesin complex; membrane; microtubule; nuclear body; nucleolus; nucleus; sperm principal piece; spindle pole;	antigen processing and presentation of exogenous peptide antigen via MHC class II; cell differentiation; cell division; microtubule-based movement; mitotic spindle assembly; mitotic spindle organization; nervous system development; retrograde vesicle-mediated transport, Golgi to ER; sister chromatid cohesion;	ATP binding; ATPase activity; microtubule binding; microtubule motor activity; motor activity;
HGDSDLQLDR	ISVYYNEATGGKYVPR	P07437			Tubulin beta chain;	9.469	45	444	Tubulin beta-5 chain;	azurophil granule lumen; cell body; cytoplasm; cytoplasmic ribonucleoprotein granule; cytoskeleton; extracellular exosome; extracellular matrix; extracellular region; membrane raft; microtubule; microtubule cytoskeleton; nuclear envelope lumen; nucleus; protein complex;	cell division; cellular process; ciliary basal body docking; cytoskeleton-dependent intracellular transport; G2/M transition of mitotic cell cycle; microtubule-based process; movement of cell or subcellular component; natural killer cell mediated cytotoxicity; neutrophil degranulation; spindle assembly;	GTP binding; GTPase activating protein binding; GTPase activity; MHC class I protein binding; protein complex binding; protein domain specific binding; structural constituent of cytoskeleton; structural molecule activity; ubiquitin protein ligase binding;
KKIGDEYFTF	ITDCKDPKACTILLR	P49368			T-complex protein 1 subunit gamma;	9.469	361	545	CCT-gamma;hTRiC5;	cell body; chaperonin-containing T-complex; cytoskeleton; cytosol; extracellular exosome; microtubule; myelin sheath; plasma membrane; zona pellucida receptor complex;	'de novo' protein folding; binding of sperm to zona pellucida; chaperone-mediated protein folding; pore complex assembly; positive regulation of protein localization to Cajal body; positive regulation of telomerase RNA localization to Cajal body; positive regulation of telomere maintenance via telomerase; protein folding; protein stabilization; toxin transport;	ATP binding; protein binding involved in protein folding; RNA binding; unfolded protein binding;
KTNERRGFCF	ITYTDEEPVKKLLESR	O14979			Heterogeneous nuclear ribonucleoprotein D-like;	9.469	277	420	AU-rich element RNA-binding factor;JKT41-binding protein;Protein laAUF1;	cytoplasm; extracellular exosome; nucleoplasm; nucleus; spliceosomal complex;	regulation of gene expression; regulation of transcription, DNA-templated; RNA processing; transcription, DNA-templated;	DNA binding; double-stranded DNA binding; poly(A) binding; poly(G) binding; RNA binding; single-stranded DNA binding;
LAYTLGVKQL	IVGVNKMDSTEPPYSQKR	P68104	Q5VTE0		Elongation factor 1-alpha 1;	9.469	147	462	Elongation factor Tu;Eukaryotic elongation factor 1 A-1;Leukocyte receptor cluster member 7;	cortical actin cytoskeleton; cytoplasm; cytoplasmic side of lysosomal membrane; cytosol; eukaryotic translation elongation factor 1 complex; extracellular exosome; extracellular region; extracellular space; ficolin-1-rich granule lumen; membrane; myelin sheath; nucleolus; nucleus; ruffle membrane; secretory granule lumen;	cellular response to epidermal growth factor stimulus; neutrophil degranulation; protein methylation; regulation of chaperone-mediated autophagy; regulation of transcription, DNA-templated; transcription, DNA-templated; translational elongation;	GTP binding; GTPase activity; protein kinase binding; RNA binding; translation elongation factor activity; tRNA binding;
PAKHRAKMDD	IVVVAQGSQASR	Q969J3			BLOC-1-related complex subunit 5 {ECO:0000305};	9.469	32	196	Loss of heterozygosity 12 chromosomal region 1 {ECO:0000312|HGNC:HGNC:17950};Myristoylated lysosomal protein {ECO:0000303|PubMed:25898167};	BORC complex; cytoplasmic side of lysosomal membrane; intrinsic component of membrane;	lysosome localization; organelle transport along microtubule;
FSASPDATIR	IWSVPNASCVQVVR	Q9UMS4			Pre-mRNA-processing factor 19 {ECO:0000305};	9.469	288	504	Nuclear matrix protein 200 {ECO:0000303|PubMed:11082287};PRP19/PSO4 homolog {ECO:0000303|PubMed:12960389};RING-type E3 ubiquitin transferase PRP19 {ECO:0000305};Senescence evasion factor {ECO:0000303|PubMed:16332694};	catalytic step 2 spliceosome; cytoplasm; lipid particle; membrane; nuclear speck; nucleoplasm; nucleus; Prp19 complex; site of double-strand break; spindle; U2-type catalytic step 1 spliceosome;	cellular protein localization; double-strand break repair via nonhomologous end joining; generation of catalytic spliceosome for first transesterification step; inner cell mass cell proliferation; lipid biosynthetic process; mRNA splicing, via spliceosome; negative regulation of neuron differentiation; positive regulation of astrocyte differentiation; positive regulation of mRNA splicing, via spl…	identical protein binding; ubiquitin protein ligase activity; ubiquitin-ubiquitin ligase activity;
DAIRDAEILR	KAMKGFGTDEQAIVDVVANR	P20073			Annexin A7;	9.469	194	488	Annexin VII;Annexin-7;Synexin;	cytosol; endoplasmic reticulum membrane; extracellular exosome; membrane; nuclear envelope; nucleus; plasma membrane;	autophagy; cell proliferation; cellular calcium ion homeostasis; cellular water homeostasis; epithelial cell differentiation; hemostasis; membrane fusion; negative regulation of gene expression; regulation of cell shape; response to calcium ion; response to organic cyclic compound; response to salt stress; social behavior;	calcium ion binding; calcium-dependent phospholipid binding; calcium-dependent protein binding; integrin binding; RNA binding;
RSGNVAELAL	KATLVESSTSGFTPGGGGSSVSMIASR	P49321			Nuclear autoantigenic sperm protein;	9.469	669	788		cytoplasm; nuclear chromatin; nucleoplasm; nucleus; protein complex;	blastocyst development; cell cycle; cell proliferation; DNA replication; DNA replication-dependent nucleosome assembly; DNA replication-independent nucleosome assembly; histone exchange; male gonad development; nucleosome assembly; protein transport; response to testosterone;	histone binding; Hsp90 protein binding; protein complex binding;
GRVFQVEYAM	KAVENSSTAIGIR	P25788			Proteasome subunit alpha type-3;	9.469	27	255	Macropain subunit C8;Multicatalytic endopeptidase complex subunit C8;Proteasome component C8;	cytoplasm; cytosol; extracellular exosome; nucleoplasm; nucleus; proteasome complex; proteasome core complex; proteasome core complex, alpha-subunit complex; synapse;	anaphase-promoting complex-dependent catabolic process; antigen processing and presentation of exogenous peptide antigen via MHC class I, TAP-dependent; Fc-epsilon receptor signaling pathway; MAPK cascade; negative regulation of canonical Wnt signaling pathway; negative regulation of G2/M transition of mitotic cell cycle; negative regulation of ubiquitin-protein ligase activity involved in mitoti…	threonine-type endopeptidase activity;
YKVGDKIATR	KAYGQALAKLGHASDR	P29401			Transketolase;	9.469	317	623		cytosol; extracellular exosome; myelin sheath; nuclear body; nuclear speck; nucleoplasm; peroxisome; vesicle;	glyceraldehyde-3-phosphate biosynthetic process; pentose-phosphate shunt; pentose-phosphate shunt, non-oxidative branch; regulation of growth; xylulose biosynthetic process;	cofactor binding; metal ion binding; protein homodimerization activity; transketolase activity;
SIMKCDIDIR	KDLYANNVLSGGTTMYPGIADR	P68032	P62736	P63267	Actin, alpha cardiac muscle 1;	9.469	290	376	Alpha-cardiac actin;	actin filament; actomyosin, actin portion; blood microparticle; cell body; cytoplasm; cytosol; extracellular exosome; extracellular space; filopodium; focal adhesion; I band; lamellipodium; membrane; sarcomere;	actin filament-based movement; actin-myosin filament sliding; actomyosin structure organization; apoptotic process; cardiac muscle contraction; cardiac muscle tissue morphogenesis; cardiac myofibril assembly; heart contraction; mesenchyme migration; muscle filament sliding; negative regulation of apoptotic process; positive regulation of gene expression; response to drug; response to ethanol; ske…	ATP binding; ATPase activity; myosin binding;
SIMKCDVDIR	KDLYANTVLSGGTTMYPGIADR	P60709	P63261		Actin, cytoplasmic 1;	9.469	289	375	Beta-actin;	blood microparticle; cortical cytoskeleton; cytoplasm; cytoplasmic ribonucleoprotein granule; cytoskeleton; cytosol; dense body; extracellular exosome; extracellular space; focal adhesion; intracellular ribonucleoprotein complex; membrane; myelin sheath; NuA4 histone acetyltransferase complex; nuclear chromatin; nucleoplasm; plasma membrane; protein complex; vesicle;	ATP-dependent chromatin remodeling; cell junction assembly; ephrin receptor signaling pathway; Fc-gamma receptor signaling pathway involved in phagocytosis; membrane organization; movement of cell or subcellular component; platelet aggregation; positive regulation of gene expression, epigenetic; postsynaptic actin cytoskeleton organization; protein deubiquitination; retina homeostasis; substantia…	ATP binding; identical protein binding; kinesin binding; nitric-oxide synthase binding; structural constituent of cytoskeleton; structural constituent of postsynaptic actin cytoskeleton; Tat protein binding;
EKRIERLSIR	KEGDGEAKSAKPGDDVR	P55809			Succinyl-CoA:3-ketoacid coenzyme A transferase 1, mitochondrial;	9.469	284	520	3-oxoacid CoA-transferase 1;Somatic-type succinyl-CoA:3-oxoacid CoA-transferase;	mitochondrial matrix; mitochondrion; nucleoplasm;	adipose tissue development; brain development; cellular ketone body metabolic process; heart development; ketone body catabolic process; ketone catabolic process; positive regulation of insulin secretion involved in cellular response to glucose stimulus; response to activity; response to drug; response to ethanol; response to hormone; response to nutrient; response to starvation;	3-oxoacid CoA-transferase activity; protein homodimerization activity;
THLAWINTPR	KEGGLGPLNIPLLADVTR	P32119			Peroxiredoxin-2;	9.469	90	198	Natural killer cell-enhancing factor B;PRP;Thiol-specific antioxidant protein;Thioredoxin peroxidase 1;Thioredoxin-dependent peroxide reductase 1;	cytoplasm; cytosol; extracellular exosome;	cell redox homeostasis; cellular response to oxidative stress; hydrogen peroxide catabolic process; negative regulation of apoptotic process; regulation of apoptotic process; removal of superoxide radicals; response to oxidative stress; response to reactive oxygen species;	antioxidant activity; thioredoxin peroxidase activity;
SEVFIQLPSR	KELPEYYELIR	P51531	P51532		Probable global transcription activator SNF2L2;	9.469	1490	1647	ATP-dependent helicase SMARCA2;BRG1-associated factor 190B;Protein brahma homolog;SNF2-alpha;SWI/SNF-related matrix-associated actin-dependent regulator of chromatin subfamily A member 2 {ECO:0000312|HGNC:HGNC:11098};	intermediate filament cytoskeleton; intracellular membrane-bounded organelle; nBAF complex; npBAF complex; nuclear chromatin; nucleoplasm; nucleus; SWI/SNF complex;	chromatin remodeling; negative regulation of cell growth; negative regulation of cell proliferation; negative regulation of transcription from RNA polymerase II promoter; negative regulation of transcription, DNA-templated; nervous system development; positive regulation of transcription from RNA polymerase II promoter; positive regulation of transcription, DNA-templated; regulation of transcript…	ATP binding; chromatin binding; DNA-dependent ATPase activity; helicase activity; histone binding; RNA polymerase II transcription coactivator activity; transcription coactivator activity; transcription regulatory region DNA binding;
ERRRLLQNKR	KEPPEDVAQR	Q9NXH9			tRNA (guanine(26)-N(2))-dimethyltransferase;	9.469	586	659	tRNA 2,2-dimethylguanosine-26 methyltransferase;tRNA(guanine-26,N(2)-N(2)) methyltransferase;tRNA(m(2,2)G26)dimethyltransferase;	mitochondrion; nucleoplasm; nucleus;	tRNA modification; tRNA N2-guanine methylation;	metal ion binding; RNA binding; tRNA (guanine-N2-)-methyltransferase activity; tRNA binding;
MAGQAFR	KFLPLFDR	P61604			10 kDa heat shock protein, mitochondrial;	9.469	6	102	10 kDa chaperonin;Chaperonin 10;Early-pregnancy factor;	extracellular exosome; membrane; mitochondrial matrix; mitochondrion;	activation of cysteine-type endopeptidase activity involved in apoptotic process; chaperone mediated protein folding requiring cofactor; osteoblast differentiation; protein folding; response to unfolded protein;	ATP binding; chaperone binding; metal ion binding; RNA binding; unfolded protein binding;
GMKYIQHTYR	KGVKIDKTDYMVGSYGPR	P52565			Rho GDP-dissociation inhibitor 1;	9.469	133	204	Rho-GDI alpha;	cytoskeleton; cytosol; extracellular exosome;	movement of cell or subcellular component; negative regulation of apoptotic process; negative regulation of axonogenesis; negative regulation of cell adhesion; positive regulation of axonogenesis; regulation of actin cytoskeleton reorganization; regulation of Rho protein signal transduction; regulation of small GTPase mediated signal transduction; semaphorin-plexin signaling pathway;	GTPase activator activity; Rho GDP-dissociation inhibitor activity;
GLNSLEAVKR	KIQALQQQADEAEDR	P67936			Tropomyosin alpha-4 chain;	9.469	11	248	TM30p1;Tropomyosin-4;	actin filament; cortical cytoskeleton; cytoskeleton; cytosol; extracellular exosome; filamentous actin; focal adhesion; membrane; muscle thin filament tropomyosin; podosome; stress fiber;	actin filament organization; movement of cell or subcellular component; muscle contraction; muscle filament sliding; osteoblast differentiation;	actin filament binding; calcium ion binding; structural constituent of muscle;
MPR	KKAAAAAWEEPSSGNGTAR	Q9P258			Protein RCC2;	9.469	2	522	RCC1-like protein TD-60;Telophase disk protein of 60 kDa;	chromosome, centromeric core domain; cytosol; early endosome membrane; microtubule; midbody; mitotic spindle midzone; nucleolus; plasma membrane;	activation of GTPase activity; cell division; chromosome passenger complex localization to kinetochore; establishment of protein localization; focal adhesion assembly; integrin-mediated signaling pathway; mitotic nuclear division; negative regulation of focal adhesion assembly; negative regulation of GTPase activity; negative regulation of substrate adhesion-dependent cell spreading; positive reg…	microtubule binding; protein domain specific binding; protein kinase binding; Rac GTPase binding; RNA binding; small GTPase binding;
QSLLETLKCL	KKDDESNLVEEKSNMIR	Q07866			Kinesin light chain 1;	9.469	55	573		axon; cytoplasmic vesicle; cytosol; growth cone; kinesin complex; membrane; microtubule; neuronal cell body;	antigen processing and presentation of exogenous peptide antigen via MHC class II; intracellular protein transport; microtubule-based movement; protein localization to synapse; retrograde vesicle-mediated transport, Golgi to ER; stress granule disassembly; viral process;	microtubule motor activity; motor activity; tubulin binding;
IAVASKTYNL	KKGQTHTLEDFQR	Q99714			3-hydroxyacyl-CoA dehydrogenase type-2;	9.469	102	261	17-beta-hydroxysteroid dehydrogenase 10;3-hydroxy-2-methylbutyryl-CoA dehydrogenase;3-hydroxyacyl-CoA dehydrogenase type II;Endoplasmic reticulum-associated amyloid beta-peptide-binding protein;Mitochondrial ribonuclease P protein 2;Short chain dehydrogenase/reductase family 5C member 1;Short-chain type dehydrogenase/reductase XH98G2;Type II HADH;	cytoplasm; mitochondrial matrix; mitochondrial ribonuclease P complex; mitochondrion; plasma membrane;	branched-chain amino acid catabolic process; lipid metabolic process; mitochondrial tRNA methylation; mitochondrial tRNA processing;	3-hydroxy-2-methylbutyryl-CoA dehydrogenase activity; 3-hydroxyacyl-CoA dehydrogenase activity; cholate 7-alpha-dehydrogenase activity; RNA binding; testosterone dehydrogenase [NAD(P)] activity;
HFRKGTLTVL	KKKWENPGLGAESHTDSLR	Q9UHB6			LIM domain and actin-binding protein 1;	9.469	71	759	Epithelial protein lost in neoplasm;	actin cytoskeleton; brush border; cleavage furrow; cytoplasm; focal adhesion; stress fiber;	actin filament bundle assembly; negative regulation of actin filament depolymerization; ruffle organization;	actin filament binding; actin monomer binding; cadherin binding; zinc ion binding;
EEEEEEEDFR	KKLNAGYSNTATEWSQPR	O75717			WD repeat and HMG-box DNA-binding protein 1;	9.469	837	1129	Acidic nucleoplasmic DNA-binding protein 1;	cytoplasm; nucleoplasm;		DNA binding;
FPGQLNADLR	KLAVNMVPFPR	P07437	Q9H4B7	P04350	Tubulin beta chain;	9.469	250	444	Tubulin beta-5 chain;	azurophil granule lumen; cell body; cytoplasm; cytoplasmic ribonucleoprotein granule; cytoskeleton; extracellular exosome; extracellular matrix; extracellular region; membrane raft; microtubule; microtubule cytoskeleton; nuclear envelope lumen; nucleus; protein complex;	cell division; cellular process; ciliary basal body docking; cytoskeleton-dependent intracellular transport; G2/M transition of mitotic cell cycle; microtubule-based process; movement of cell or subcellular component; natural killer cell mediated cytotoxicity; neutrophil degranulation; spindle assembly;	GTP binding; GTPase activating protein binding; GTPase activity; MHC class I protein binding; protein complex binding; protein domain specific binding; structural constituent of cytoskeleton; structural molecule activity; ubiquitin protein ligase binding;
DPFTIKPLDR	KLILDSAR	P29401			Transketolase;	9.469	541	623		cytosol; extracellular exosome; myelin sheath; nuclear body; nuclear speck; nucleoplasm; peroxisome; vesicle;	glyceraldehyde-3-phosphate biosynthetic process; pentose-phosphate shunt; pentose-phosphate shunt, non-oxidative branch; regulation of growth; xylulose biosynthetic process;	cofactor binding; metal ion binding; protein homodimerization activity; transketolase activity;
ESLMQFSKPR	KLVNTINPGAR	Q92900			Regulator of nonsense transcripts 1;	9.469	927	1129	ATP-dependent helicase RENT1;Nonsense mRNA reducing factor 1;Up-frameshift suppressor 1 homolog;	chromatin; cytoplasm; cytosol; exon-exon junction complex; nuclear chromosome, telomeric region; nucleoplasm; nucleus; P-body; supraspliceosomal complex;	3'-UTR-mediated mRNA destabilization; cell cycle phase transition; cellular response to interleukin-1; cellular response to lipopolysaccharide; DNA repair; DNA replication; dosage compensation by inactivation of X chromosome; histone mRNA catabolic process; mRNA export from nucleus; nuclear-transcribed mRNA catabolic process; nuclear-transcribed mRNA catabolic process, endonucleolytic cleavage-de…	ATP binding; ATP-dependent RNA helicase activity; chromatin binding; helicase activity; RNA binding; telomeric DNA binding; zinc ion binding;
FPEFLTMMAR	KMKDTDSEEEIR	P62158			NAME?! (Calmodulin-1)	9.469	74	149
RARIMQIHSR	KMNVSPDVNYEELAR	P17980			26S protease regulatory subunit 6A;	9.469	370	439	26S proteasome AAA-ATPase subunit RPT5;Proteasome 26S subunit ATPase 3;Proteasome subunit P50;Tat-binding protein 1;	cytosol; cytosolic proteasome complex; extracellular region; ficolin-1-rich granule lumen; membrane; nuclear proteasome complex; nucleoplasm; nucleus; P-body; proteasome accessory complex; proteasome complex; proteasome regulatory particle, base subcomplex; secretory granule lumen;	anaphase-promoting complex-dependent catabolic process; antigen processing and presentation of exogenous peptide antigen via MHC class I, TAP-dependent; blastocyst development; Fc-epsilon receptor signaling pathway; MAPK cascade; modulation by host of viral transcription; negative regulation of canonical Wnt signaling pathway; negative regulation of G2/M transition of mitotic cell cycle; negative…	ATP binding; ATPase activity; identical protein binding; proteasome-activating ATPase activity; TBP-class protein binding;
AVEDDFVEMR	KNDPQSITADDLHQLLVVAR	Q9BTE3			Mini-chromosome maintenance complex-binding protein;	9.469	580	642		cytosol; nuclear chromatin; nucleoplasm; nucleus; plasma membrane;	cell division; DNA-dependent DNA replication; mitotic nuclear division; sister chromatid cohesion;	chromatin binding;
LASMLREVER	KNEELSVLLKAQQVESER	Q8TCG1			Protein CIP2A;	9.469	683	905	Cancerous inhibitor of PP2A;p90 autoantigen;	cytoplasm; cytosol; integral component of membrane; plasma membrane;	positive regulation of neural precursor cell proliferation; spermatogenesis;	cadherin binding;
TYPMQCSALR	KNGFVVLKGR	P63241	Q9GZV4		Eukaryotic translation initiation factor 5A-1;	9.469	25	153	Eukaryotic initiation factor 5A isoform 1;Rev-binding factor;eIF-4D;	annulate lamellae; cytoplasm; cytosol; endoplasmic reticulum membrane; extracellular exosome; membrane; nuclear pore; nucleus;	apoptotic process; mRNA export from nucleus; nucleocytoplasmic transport; peptidyl-lysine modification to peptidyl-hypusine; positive regulation of cell proliferation; positive regulation of translational elongation; positive regulation of translational termination; protein export from nucleus; translational frameshifting;	protein N-terminus binding; ribosome binding; RNA binding; translation elongation factor activity; U6 snRNA binding;
NKQLPSAGPD	KNLVTGDHIPTPQDLPQR	O43768			Alpha-endosulfine;	9.469	87	121	ARPP-19e;	cytoplasm; nucleoplasm;	cell division; G2/M transition of mitotic cell cycle; mitotic nuclear division; negative regulation of protein dephosphorylation; regulation of insulin secretion; response to glucose; response to nutrient; transport;	ion channel inhibitor activity; phosphatase inhibitor activity; potassium channel inhibitor activity; protein phosphatase 2A binding; protein phosphatase inhibitor activity; protein phosphatase regulator activity; receptor binding;
EDDVRQYVVR	KPLNKEGKKPR	P62753			40S ribosomal protein S6;	9.469	158	249	Phosphoprotein NP33;Small ribosomal subunit protein eS6 {ECO:0000303|PubMed:24524803};	cell body; cytoplasmic ribonucleoprotein granule; cytosol; cytosolic small ribosomal subunit; dendrite; intracellular ribonucleoprotein complex; membrane; nucleolus; nucleoplasm; nucleus; perinuclear region of cytoplasm; polysome; small ribosomal subunit;	activation-induced cell death of T cells; erythrocyte development; G1/S transition of mitotic cell cycle; gastrulation; glucose homeostasis; mitotic cell cycle checkpoint; mitotic nuclear division; negative regulation of apoptotic process; nuclear-transcribed mRNA catabolic process, nonsense-mediated decay; oogenesis stage; placenta development; positive regulation of apoptotic process; ribosomal…	protein kinase binding; RNA binding; structural constituent of ribosome;
QTEIALLLQR	KQELVAELDQDEKDQQNTSR	O43318			Mitogen-activated protein kinase kinase kinase 7;	9.469	545	606	Transforming growth factor-beta-activated kinase 1;	Ada2/Gcn5/Ada3 transcription activator complex; cytosol; endosome membrane; nucleus; plasma membrane;	activation of MAPK activity; activation of MAPKK activity; activation of NF-kappaB-inducing kinase activity; anoikis; Fc-epsilon receptor signaling pathway; histone H3 acetylation; I-kappaB kinase/NF-kappaB signaling; I-kappaB phosphorylation; JNK cascade; MyD88-dependent toll-like receptor signaling pathway; nucleotide-binding oligomerization domain containing signaling pathway; positive regulat…	ATP binding; identical protein binding; magnesium ion binding; MAP kinase kinase kinase activity; protein kinase activity; protein serine/threonine kinase activity; scaffold protein binding;
LSTFQQMWIS	KQEYDESGPSIVHR	P60709	Q9BYX7	P63261	Actin, cytoplasmic 1;	9.469	1057	1075	Beta-actin;	blood microparticle; cortical cytoskeleton; cytoplasm; cytoplasmic ribonucleoprotein granule; cytoskeleton; cytosol; dense body; extracellular exosome; extracellular space; focal adhesion; intracellular ribonucleoprotein complex; membrane; myelin sheath; NuA4 histone acetyltransferase complex; nuclear chromatin; nucleoplasm; plasma membrane; protein complex; vesicle;	ATP-dependent chromatin remodeling; cell junction assembly; ephrin receptor signaling pathway; Fc-gamma receptor signaling pathway involved in phagocytosis; membrane organization; movement of cell or subcellular component; platelet aggregation; positive regulation of gene expression, epigenetic; postsynaptic actin cytoskeleton organization; protein deubiquitination; retina homeostasis; substantia…	ATP binding; identical protein binding; kinesin binding; nitric-oxide synthase binding; structural constituent of cytoskeleton; structural constituent of postsynaptic actin cytoskeleton; Tat protein binding;
GSSCSPVLSR	KQKGKVLLGEEEALEDDSESR	P42858			Huntingtin;	9.469	436	3142	Huntington disease protein;	autophagosome; axon; centriole; cytoplasm; cytoplasmic vesicle membrane; cytosol; dendrite; endoplasmic reticulum; Golgi apparatus; inclusion body; late endosome; nucleoplasm; nucleus; perinuclear region of cytoplasm; protein complex;	animal organ development; apoptotic process; establishment of mitotic spindle orientation; Golgi organization; negative regulation of extrinsic apoptotic signaling pathway; positive regulation of aggrephagy; positive regulation of apoptotic process; positive regulation of cilium assembly; positive regulation of inositol 1,4,5-trisphosphate-sensitive calcium-release channel activity; positive regu…	beta-tubulin binding; dynactin binding; dynein intermediate chain binding; heat shock protein binding; identical protein binding; ion channel binding; kinase binding; p53 binding; profilin binding; transcription factor binding;
FQMEQYIYKR	KSDGIYIINLKR	P08865			40S ribosomal protein SA {ECO:0000255|HAMAP-Rule:MF_03016};	9.469	40	295	37 kDa laminin receptor precursor {ECO:0000255|HAMAP-Rule:MF_03016};37/67 kDa laminin receptor {ECO:0000255|HAMAP-Rule:MF_03016};67 kDa laminin receptor {ECO:0000255|HAMAP-Rule:MF_03016};Colon carcinoma laminin-binding protein;Laminin receptor 1 {ECO:0000255|HAMAP-Rule:MF_03016};Laminin-binding protein precursor p40 {ECO:0000255|HAMAP-Rule:MF_03016};Multidrug resistance-associated protein MGr1-Ag…	90S preribosome; cytoplasm; cytosol; cytosolic small ribosomal subunit; extracellular exosome; membrane; nucleoplasm; nucleus; plasma membrane;	cell adhesion; endonucleolytic cleavage in ITS1 to separate SSU-rRNA from 5.8S rRNA and LSU-rRNA from tricistronic rRNA transcript (SSU-rRNA, 5.8S rRNA, LSU-rRNA); endonucleolytic cleavage to generate mature 3'-end of SSU-rRNA from (SSU-rRNA, 5.8S rRNA, LSU-rRNA); nuclear-transcribed mRNA catabolic process, nonsense-mediated decay; ribosomal small subunit assembly; rRNA export from nucleus; rRNA …	laminin receptor activity; ribosome binding; RNA binding; structural constituent of ribosome; virus receptor activity;
YEQLKGEWNR	KSPNLSKCGEELGR	P48556			26S proteasome non-ATPase regulatory subunit 8;	9.469	103	350	26S proteasome regulatory subunit RPN12;26S proteasome regulatory subunit S14;p31;	cytosol; extracellular exosome; nucleoplasm; nucleus; proteasome accessory complex; proteasome complex; proteasome regulatory particle; proteasome regulatory particle, lid subcomplex;	anaphase-promoting complex-dependent catabolic process; antigen processing and presentation of exogenous peptide antigen via MHC class I, TAP-dependent; Fc-epsilon receptor signaling pathway; MAPK cascade; negative regulation of canonical Wnt signaling pathway; negative regulation of G2/M transition of mitotic cell cycle; negative regulation of ubiquitin-protein ligase activity involved in mitoti…
YEVQPPRVDR	KSTEIFQAHIQASQGIMQPLGKEDSSMYR	Q92562			Polyphosphoinositide phosphatase;	9.469	869	907	Phosphatidylinositol 3,5-bisphosphate 5-phosphatase;SAC domain-containing protein 3;	early endosome membrane; endoplasmic reticulum; endosome membrane; Golgi membrane; intracellular membrane-bounded organelle; late endosome membrane; lipid particle; recycling endosome;	locomotory behavior; myelin assembly; negative regulation of myelination; neuron development; phosphatidylinositol biosynthetic process; pigmentation; positive regulation of neuron projection development; vacuole organization;	phosphatidylinositol-3,5-bisphosphate 5-phosphatase activity; phosphatidylinositol-3-phosphatase activity; phosphatidylinositol-4-phosphate phosphatase activity;
PTKTLRITTR	KTPCGEGSKTWDR	P60866			40S ribosomal protein S20;	9.469	65	119	Small ribosomal subunit protein uS10 {ECO:0000303|PubMed:24524803};	cytosol; cytosolic small ribosomal subunit; extracellular exosome; extracellular matrix; membrane; nucleoplasm;	nuclear-transcribed mRNA catabolic process, nonsense-mediated decay; rRNA processing; SRP-dependent cotranslational protein targeting to membrane; translation; translational initiation; viral transcription;	RNA binding; structural constituent of ribosome;
TFTALEGKLR	KTTEENQELVTR	Q676U5			Autophagy-related protein 16-1;	9.469	180	607	APG16-like 1;	autophagosome; autophagosome membrane; axoneme; cytosol; pre-autophagosomal structure membrane;	autophagosome assembly; macroautophagy; negative stranded viral RNA replication; protein homooligomerization; protein transport;	identical protein binding; ubiquitin-like protein transferase activity;
PILASQPGIR	KVAFCGAPEEGR	Q8IZ83			Aldehyde dehydrogenase family 16 member A1;	9.469	243	802		extracellular exosome; membrane;		aldehyde dehydrogenase (NAD) activity;
AKLSDGVAVL	KVGGTSDVEVNEKKDR	P10809			60 kDa heat shock protein, mitochondrial;	9.469	403	573	60 kDa chaperonin;Chaperonin 60;Heat shock protein 60;HuCHA60;Mitochondrial matrix protein P1;P60 lymphocyte protein;	cell surface; clathrin-coated pit; coated vesicle; cytoplasm; cytosol; early endosome; extracellular exosome; extracellular matrix; extracellular space; Golgi apparatus; lipopolysaccharide receptor complex; membrane; membrane raft; mitochondrial crista; mitochondrial inner membrane; mitochondrial matrix; mitochondrion; myelin sheath; peroxisomal matrix; plasma membrane; protein complex; rough end…	'de novo' protein folding; activation of cysteine-type endopeptidase activity involved in apoptotic process; apoptotic mitochondrial changes; B cell activation; B cell cytokine production; B cell proliferation; chaperone mediated protein folding requiring cofactor; chaperone-mediated protein complex assembly; chaperone-mediated protein folding; detection of misfolded protein; interaction with sym…	apolipoprotein A-I binding; apolipoprotein binding; ATP binding; ATPase activity; chaperone binding; DNA replication origin binding; double-stranded RNA binding; enzyme binding; high-density lipoprotein particle binding; insulin binding; lipopolysaccharide binding; misfolded protein binding; p53 binding; protease binding; protein binding involved in protein folding; protein complex binding; prote…
KDVIRPGMRR	KVPGEGLPLPKTPEKR	P25685			DnaJ homolog subfamily B member 1;	9.469	294	340	DnaJ protein homolog 1;Heat shock 40 kDa protein 1;Human DnaJ protein 1;	cytoplasm; cytosol; extracellular exosome; nucleolus; nucleoplasm; nucleus;	chaperone cofactor-dependent protein refolding; chaperone mediated protein folding requiring cofactor; negative regulation of inclusion body assembly; negative regulation of transcription from RNA polymerase II promoter in response to stress; positive regulation of ATPase activity; regulation of cellular response to heat; response to unfolded protein;	ATPase activator activity; ATPase binding; cadherin binding; chaperone binding; Hsp70 protein binding; RNA polymerase II transcription corepressor activity; unfolded protein binding;
KRNSVRLVIR	KVQYAPERPGPQPTAETTR	P49407			Beta-arrestin-1;	9.469	168	418	Arrestin beta-1;	basolateral plasma membrane; chromatin; clathrin-coated pit; cytoplasm; cytoplasmic vesicle; cytoplasmic vesicle membrane; cytosol; dendritic spine; Golgi membrane; lysosomal membrane; nuclear body; nucleoplasm; nucleus; plasma membrane; postsynaptic density; postsynaptic membrane; pseudopodium;	activation of MAPK activity; follicle-stimulating hormone signaling pathway; G-protein coupled receptor internalization; membrane organization; negative regulation of ERK1 and ERK2 cascade; negative regulation of GTPase activity; negative regulation of interleukin-6 production; negative regulation of interleukin-8 production; negative regulation of NF-kappaB transcription factor activity; negativ…	alpha-1A adrenergic receptor binding; alpha-1B adrenergic receptor binding; angiotensin receptor binding; AP-2 adaptor complex binding; clathrin adaptor activity; cysteine-type endopeptidase inhibitor activity involved in apoptotic process; enzyme inhibitor activity; estrogen receptor binding; follicle-stimulating hormone receptor binding; GTPase activator activity; insulin-like growth factor rec…
FYEEVHDLER	KYAVLYQPLFDKR	P55209			Nucleosome assembly protein 1-like 1;	9.469	103	391	NAP-1-related protein;	melanosome; membrane; nucleus;	DNA replication; nucleosome assembly; positive regulation of cell proliferation;	RNA binding;
VRDLSYRLVF	LACCVAPTNPR	Q14566			DNA replication licensing factor MCM6;	9.469	297	821	p105MCM;	MCM complex; nuclear chromosome, telomeric region; nucleoplasm; nucleus;	DNA replication; DNA replication initiation; DNA unwinding involved in DNA replication; G1/S transition of mitotic cell cycle;	ATP binding; DNA helicase activity; identical protein binding; single-stranded DNA binding;
AQQEAEAAQR	LAEEKAQASSIPVGSR	Q99426			Tubulin-folding cofactor B;	9.469	147	244	Cytoskeleton-associated protein 1;Cytoskeleton-associated protein CKAPI;Tubulin-specific chaperone B;	cytoplasm; cytosol; microtubule; microtubule cytoskeleton;	cell differentiation; nervous system development;
PELDAYEAEG	LALDDEDVEELTASQR	P49736			DNA replication licensing factor MCM2;	9.469	93	904	Minichromosome maintenance protein 2 homolog;Nuclear protein BM28;	chromatin; cytoplasm; cytosol; MCM complex; microtubule cytoskeleton; nuclear chromosome, telomeric region; nuclear origin of replication recognition complex; nucleoplasm; nucleus;	apoptotic process; cellular response to interleukin-4; cochlea development; DNA replication; DNA replication initiation; DNA unwinding involved in DNA replication; G1/S transition of mitotic cell cycle; nucleosome assembly;	ATP binding; DNA binding; DNA helicase activity; DNA replication origin binding; enzyme binding; histone binding; metal ion binding;
FDMTSKFLTA	LAQDGVINEEALSVTELDR	Q8WUM4			Programmed cell death 6-interacting protein;	9.469	586	868	ALG-2-interacting protein 1;ALG-2-interacting protein X;Hp95;	actomyosin; bicellular tight junction; cytosol; endoplasmic reticulum exit site; extracellular exosome; extracellular vesicle; focal adhesion; immunological synapse; melanosome; membrane; microtubule organizing center; myelin sheath;	actomyosin contractile ring assembly; apoptotic process; bicellular tight junction assembly; cell separation after cytokinesis; maintenance of epithelial cell apical/basal polarity; multivesicular body assembly; positive regulation of exosomal secretion; positive regulation of extracellular exosome assembly; protein transport; regulation of centrosome duplication; regulation of extracellular exos…	calcium-dependent protein binding; protein homodimerization activity; proteinase activated receptor binding;
SGEEFDCAFR	LAQEGIYTLYPFINSR	Q08J23			tRNA (cytosine(34)-C(5))-methyltransferase;	9.469	601	767	Myc-induced SUN domain-containing protein;NOL1/NOP2/Sun domain family member 2;Substrate of AIM1/Aurora kinase B;tRNA (cytosine-5-)-methyltransferase;tRNA methyltransferase 4 homolog;	chromatoid body; cytoplasm; nucleolus; nucleoplasm; spindle;	cell division; hair follicle maturation; meiotic cell cycle checkpoint; mitotic nuclear division; spermatid development; tRNA methylation; tRNA modification;	RNA binding; tRNA (cytosine-5-)-methyltransferase activity; tRNA binding;
SRYFALVERR	LAQEQGGGDNSLLVR	Q9UID3			Vacuolar protein sorting-associated protein 51 homolog;	9.469	354	782	Another new gene 2 protein;Protein fat-free homolog;	cytosol; EARP complex; GARP complex; Golgi apparatus; integral component of membrane; intracellular membrane-bounded organelle; membrane; nucleolus; recycling endosome; trans-Golgi network; trans-Golgi network membrane;	autophagy; endocytic recycling; Golgi organization; Golgi vesicle transport; lipid transport; lysosomal transport; protein transport; retrograde transport, endosome to Golgi;
DRPDRDNDLR	LAQHITYVHQHSR	P33993			DNA replication licensing factor MCM7;	9.469	531	719	CDC47 homolog;P1.1-MCM3;	chromatin; cytosol; MCM complex; membrane; nuclear chromosome, telomeric region; nucleoplasm;	cell proliferation; cellular response to DNA damage stimulus; cellular response to epidermal growth factor stimulus; cellular response to xenobiotic stimulus; DNA replication; DNA replication initiation; DNA unwinding involved in DNA replication; G1/S transition of mitotic cell cycle; regulation of phosphorylation; response to drug;	ATP binding; DNA helicase activity; single-stranded DNA binding;
KKLAKKYDAF	LASESLIKQIPR	P62906			60S ribosomal protein L10a;	9.469	109	217	CSA-19;Large ribosomal subunit protein uL1 {ECO:0000303|PubMed:24524803};Neural precursor cell expressed developmentally down-regulated protein 6;	cytosol; cytosolic large ribosomal subunit; extracellular exosome; focal adhesion; membrane; nucleus;	maturation of LSU-rRNA; nuclear-transcribed mRNA catabolic process, nonsense-mediated decay; response to ethanol; rRNA processing; SRP-dependent cotranslational protein targeting to membrane; translation; translational initiation; viral transcription;	RNA binding; structural constituent of ribosome;
HAQDYGGLLL	LATASGNANMVNKLAEGAER	P35606			Coatomer subunit beta';	9.469	700	906	Beta'-coat protein;p102;	COPI vesicle coat; cytosol; endoplasmic reticulum membrane; Golgi membrane; transport vesicle;	ER to Golgi vesicle-mediated transport; intra-Golgi vesicle-mediated transport; intracellular protein transport; retrograde vesicle-mediated transport, Golgi to ER; toxin transport;	structural molecule activity;
NRVPAGLEKR	LCAAAASILGKPADR	A6NHG4	P30046		D-dopachrome decarboxylase-like protein;	9.469	21	118	D-dopachrome tautomerase-like protein;	cytoplasm; extracellular exosome;		lyase activity;
EFQEYTMLCL	LCGKAEDTISILPDDPR	Q8WUH1			Protein Churchill;	9.469	115	139			multicellular organism development; positive regulation of transcription, DNA-templated; transcription, DNA-templated;	zinc ion binding;
APEGIEPLVY	LCQTDTEAVR	Q6ZS17			Protein FAM65A;	9.469	1170	1223		cytoplasm; extracellular exosome;
EPWHLDIFEF	LDLKKNTGKEEQR	P23921			Ribonucleoside-diphosphate reductase large subunit;	9.469	310	792	Ribonucleoside-diphosphate reductase subunit M1;Ribonucleotide reductase large subunit;	cell projection; cytosol; extracellular exosome; neuronal cell body; nuclear envelope; ribonucleoside-diphosphate reductase complex;	cell proliferation in forebrain; deoxyribonucleotide biosynthetic process; DNA replication; male gonad development; mitotic cell cycle; nucleobase-containing small molecule interconversion; protein heterotetramerization; pyrimidine nucleobase metabolic process; response to ionizing radiation; retina development in camera-type eye;	ATP binding; disordered domain specific binding; ribonucleoside-diphosphate reductase activity, thioredoxin disulfide as acceptor;
ALGLDQQFAG	LDLNSSDNQSGGSTASKGR	O00571			ATP-dependent RNA helicase DDX3X;	9.469	17	662	DEAD box protein 3, X-chromosomal;DEAD box, X isoform;Helicase-like protein 2;	cytoplasm; cytoplasmic stress granule; cytosol; extracellular exosome; extracellular region; ficolin-1-rich granule lumen; mitochondrial outer membrane; nuclear speck; nucleus; secretory granule lumen;	cellular response to arsenic-containing substance; cellular response to osmotic stress; chromosome segregation; extrinsic apoptotic signaling pathway via death domain receptors; innate immune response; intracellular signal transduction; intrinsic apoptotic signaling pathway; mature ribosome assembly; negative regulation of apoptotic process; negative regulation of cell growth; negative regulation…	ATP binding; ATP-dependent DNA helicase activity; ATP-dependent RNA helicase activity; ATPase activity; cadherin binding; CTPase activity; DNA binding; eukaryotic initiation factor 4E binding; GTPase activity; mRNA 5'-UTR binding; nucleoside-triphosphatase activity; poly(A) binding; ribosomal small subunit binding; RNA binding; RNA stem-loop binding; RNA strand annealing activity; transcription f…
KRFPHDKLLL	LDTQQEAGMLLR	Q2NL82			Pre-rRNA-processing protein TSR1 homolog;	9.469	221	804		cytosol; nucleolus; nucleoplasm; preribosome, small subunit precursor;	endonucleolytic cleavage of tricistronic rRNA transcript (SSU-rRNA, 5.8S rRNA, LSU-rRNA); maturation of SSU-rRNA from tricistronic rRNA transcript (SSU-rRNA, 5.8S rRNA, LSU-rRNA); ribosome assembly; rRNA processing;	GTP binding; GTPase activity; RNA binding; U3 snoRNA binding;
PYLVSNVIEL	LDVDPNDQEEDGANIDLDSQR	P17980			26S protease regulatory subunit 6A;	9.469	95	439	26S proteasome AAA-ATPase subunit RPT5;Proteasome 26S subunit ATPase 3;Proteasome subunit P50;Tat-binding protein 1;	cytosol; cytosolic proteasome complex; extracellular region; ficolin-1-rich granule lumen; membrane; nuclear proteasome complex; nucleoplasm; nucleus; P-body; proteasome accessory complex; proteasome complex; proteasome regulatory particle, base subcomplex; secretory granule lumen;	anaphase-promoting complex-dependent catabolic process; antigen processing and presentation of exogenous peptide antigen via MHC class I, TAP-dependent; blastocyst development; Fc-epsilon receptor signaling pathway; MAPK cascade; modulation by host of viral transcription; negative regulation of canonical Wnt signaling pathway; negative regulation of G2/M transition of mitotic cell cycle; negative…	ATP binding; ATPase activity; identical protein binding; proteasome-activating ATPase activity; TBP-class protein binding;
KDGNASGTTL	LEALDCILPPTRPTDKPLR	P68104	Q5VTE0		Elongation factor 1-alpha 1;	9.469	227	462	Elongation factor Tu;Eukaryotic elongation factor 1 A-1;Leukocyte receptor cluster member 7;	cortical actin cytoskeleton; cytoplasm; cytoplasmic side of lysosomal membrane; cytosol; eukaryotic translation elongation factor 1 complex; extracellular exosome; extracellular region; extracellular space; ficolin-1-rich granule lumen; membrane; myelin sheath; nucleolus; nucleus; ruffle membrane; secretory granule lumen;	cellular response to epidermal growth factor stimulus; neutrophil degranulation; protein methylation; regulation of chaperone-mediated autophagy; regulation of transcription, DNA-templated; transcription, DNA-templated; translational elongation;	GTP binding; GTPase activity; protein kinase binding; RNA binding; translation elongation factor activity; tRNA binding;
GWFPSSYTKL	LEENETEAVTVPTPSPTPVR	Q9UHR4			Brain-specific angiogenesis inhibitor 1-associated protein 2-like protein 1;	9.469	398	511	Insulin receptor tyrosine kinase substrate;	cell-cell adherens junction; cytoskeleton; cytosol; extracellular exosome; nucleoplasm; plasma membrane;	actin crosslink formation; actin filament bundle assembly; insulin receptor signaling pathway; plasma membrane organization; positive regulation of actin cytoskeleton reorganization; positive regulation of actin filament polymerization; regulation of insulin receptor signaling pathway; response to bacterium;	actin binding; cadherin binding involved in cell-cell adhesion; proline-rich region binding;
VKENSAVRVL	LEEQVKYER	Q9H825			Methyltransferase-like protein 8;	9.469	73	291		cytoplasm; nucleus;		methyltransferase activity;
FTISEAVLER	LEMPKILER	Q9UPQ0			LIM and calponin homology domains-containing protein 1;	9.469	458	1083			actomyosin structure organization;	actin binding; zinc ion binding;
GQVVAMKKIR	LESEEEGVPSTAIR	P06493			Cyclin-dependent kinase 1;	9.469	35	297	Cell division control protein 2 homolog;Cell division protein kinase 1;p34 protein kinase;	centrosome; cyclin B1-CDK1 complex; cyclin-dependent protein kinase holoenzyme complex; cytosol; extracellular exosome; membrane; midbody; mitochondrial matrix; mitochondrion; mitotic spindle; nuclear chromosome, telomeric region; nucleoplasm; nucleus; spindle microtubule;	activation of MAPK activity; anaphase-promoting complex-dependent catabolic process; animal organ regeneration; apoptotic process; cell aging; cell division; cell migration; cell proliferation; cellular response to hydrogen peroxide; centrosome cycle; chromosome condensation; ciliary basal body docking; DNA damage response, signal transduction by p53 class mediator resulting in cell cycle arrest;…	ATP binding; chromatin binding; cyclin binding; cyclin-dependent protein kinase activity; cyclin-dependent protein serine/threonine kinase activity; histone kinase activity; Hsp70 protein binding; protein kinase activity; protein serine/threonine kinase activity; RNA polymerase II carboxy-terminal domain kinase activity;
QYLKDELKKR	LETVALPLQGLEDLAADR	Q9UPN3			Microtubule-actin cross-linking factor 1, isoforms 1/2/3/5;	9.469	4770	7388	620 kDa actin-binding protein;Actin cross-linking family protein 7;Macrophin-1;Trabeculin-alpha;	cytoplasm; cytoskeleton; Golgi apparatus; microtubule; plasma membrane; ruffle membrane;	Golgi to plasma membrane protein transport; positive regulation of axon extension; positive regulation of Wnt signaling pathway; regulation of epithelial cell migration; regulation of focal adhesion assembly; regulation of microtubule-based process; Wnt signaling pathway; wound healing;	actin binding; actin filament binding; ATPase activity; cadherin binding; calcium ion binding; microtubule binding; RNA binding;
IEKSNLNRQF	LFRPWDVTKLKSDTAAAAVR	P22314			Ubiquitin-like modifier-activating enzyme 1;	9.469	516	1058	Protein A1S9;Ubiquitin-activating enzyme E1;	cytoplasm; cytosol; extracellular exosome; mitochondrion; nucleoplasm; nucleus;	cellular response to DNA damage stimulus; protein ubiquitination;	ATP binding; RNA binding; ubiquitin activating enzyme activity;
ENSLSISNPG	LFTSLGPPLR	Q9BXT4			Tudor domain-containing protein 1;	9.469	155	1180	Cancer/testis antigen 41.1;	chromatoid body; cytoplasm; P granule; pi-body;	DNA methylation involved in gamete generation; gene silencing by RNA; germ cell development; meiotic cell cycle; multicellular organism development; piRNA metabolic process; spermatogenesis;	metal ion binding;
MR	LFVSDGVPGCLPVLAAAGR	P56192			Methionine--tRNA ligase, cytoplasmic;	9.469	1	900	Methionyl-tRNA synthetase;	aminoacyl-tRNA synthetase multienzyme complex; cytoplasm; cytosol; extracellular exosome; membrane; nucleolus;	cellular response to epidermal growth factor stimulus; cellular response to insulin stimulus; cellular response to platelet-derived growth factor stimulus; cellular response to starvation; methionyl-tRNA aminoacylation; positive regulation of transcription of nuclear large rRNA transcript from RNA polymerase I promoter; rRNA transcription; tRNA aminoacylation for protein translation;	ATP binding; methionine-tRNA ligase activity; tRNA binding;
AQTVVVGRAR	LGGIPVGVVAVETR	Q13085			Acetyl-CoA carboxylase 1;	9.469	1976	2346	ACC-alpha;	actin cytoskeleton; cytosol; extracellular exosome; fibrillar center; mitochondrion;	acetyl-CoA metabolic process; biotin metabolic process; carnitine shuttle; cellular response to prostaglandin E stimulus; fatty acid biosynthetic process; lipid homeostasis; long-chain fatty-acyl-CoA biosynthetic process; malonyl-CoA biosynthetic process; multicellular organismal protein metabolic process; positive regulation of cellular metabolic process; protein homotetramerization; tissue home…	acetyl-CoA carboxylase activity; ATP binding; biotin carboxylase activity; metal ion binding;
PMNHKEKFEN	LGIQPPKGVLMYGPPGTGKTLLAR	P17980			26S protease regulatory subunit 6A;	9.469	213	439	26S proteasome AAA-ATPase subunit RPT5;Proteasome 26S subunit ATPase 3;Proteasome subunit P50;Tat-binding protein 1;	cytosol; cytosolic proteasome complex; extracellular region; ficolin-1-rich granule lumen; membrane; nuclear proteasome complex; nucleoplasm; nucleus; P-body; proteasome accessory complex; proteasome complex; proteasome regulatory particle, base subcomplex; secretory granule lumen;	anaphase-promoting complex-dependent catabolic process; antigen processing and presentation of exogenous peptide antigen via MHC class I, TAP-dependent; blastocyst development; Fc-epsilon receptor signaling pathway; MAPK cascade; modulation by host of viral transcription; negative regulation of canonical Wnt signaling pathway; negative regulation of G2/M transition of mitotic cell cycle; negative…	ATP binding; ATPase activity; identical protein binding; proteasome-activating ATPase activity; TBP-class protein binding;
LVLERVCSTL	LGLEEHLNALDR	Q3LXA3			Triokinase/FMN cyclase {ECO:0000312|HGNC:HGNC:24552};	9.469	384	575	Bifunctional ATP-dependent dihydroxyacetone kinase/FAD-AMP lyase (cyclizing);	cytosol; extracellular exosome; nucleus;	carbohydrate phosphorylation; cellular carbohydrate metabolic process; fructose catabolic process to hydroxyacetone phosphate and glyceraldehyde-3-phosphate; glycerol metabolic process; innate immune response; negative regulation of MDA-5 signaling pathway; regulation of innate immune response;	ATP binding; FAD-AMP lyase (cyclizing) activity; glycerone kinase activity; metal ion binding; triokinase activity;
QELYAAGENR	LGTDESKFNAVLCSR	P50995			Annexin A11;	9.469	370	505	56 kDa autoantigen;Annexin XI;Annexin-11;Calcyclin-associated annexin 50;	azurophil granule; cytoplasm; cytosol; extracellular exosome; melanosome; membrane; midbody; nuclear envelope; nucleoplasm; phagocytic vesicle; specific granule; spindle;	cytokinetic process; phagocytosis; response to calcium ion;	calcium ion binding; calcium-dependent phospholipid binding; calcium-dependent protein binding; MHC class II protein complex binding; phosphatidylethanolamine binding; RNA binding; S100 protein binding;
TTSASDDLEA	LGTLSLGTTEEKAAAEAAVPR	Q9NZQ3			NCK-interacting protein with SH3 domain;	9.469	288	722	54 kDa VacA-interacting protein;54 kDa vimentin-interacting protein;90 kDa SH3 protein interacting with Nck;AF3p21;Dia-interacting protein 1;Diaphanous protein-interacting protein;SH3 adapter protein SPIN90;WASP-interacting SH3-domain protein;Wiskott-Aldrich syndrome protein-interacting protein;	cytosol; intermediate filament; nucleus;	cytoskeleton organization; Fc-gamma receptor signaling pathway involved in phagocytosis; NLS-bearing protein import into nucleus; positive regulation of neuron projection development; signal transduction;	cytoskeletal protein binding; SH3 domain binding;
RPTRPDKARR	LGYKAKQGYVIYR	P61313			60S ribosomal protein L15;	9.469	49	204	Large ribosomal subunit protein eL15 {ECO:0000303|PubMed:24524803};	A band; cytosol; cytosolic large ribosomal subunit; extracellular exosome; membrane; nucleus; ribosome;	cytoplasmic translation; nuclear-transcribed mRNA catabolic process, nonsense-mediated decay; response to ethanol; rRNA processing; SRP-dependent cotranslational protein targeting to membrane; translation; translational initiation; viral transcription;	cadherin binding; RNA binding; structural constituent of ribosome;
IQPSREQVQR	LIAEQPPHLTPGIR	P78330			Phosphoserine phosphatase;	9.469	77	225	L-3-phosphoserine phosphatase;O-phosphoserine phosphohydrolase;	cytosol; neuron projection;	L-serine biosynthetic process; L-serine metabolic process; response to mechanical stimulus; response to nutrient levels; response to testosterone;	calcium ion binding; magnesium ion binding; phosphoserine phosphatase activity; protein homodimerization activity;
SIDKTGENFR	LIYDTKGR	P62701			40S ribosomal protein S4, X isoform;	9.469	99	263	SCR10;Single copy abundant mRNA protein;Small ribosomal subunit protein eS4 {ECO:0000303|PubMed:24524803};	cytoplasmic ribonucleoprotein granule; cytosol; cytosolic small ribosomal subunit; extracellular exosome; extracellular matrix; focal adhesion; intracellular ribonucleoprotein complex; membrane; nucleoplasm; polysome; ribosome; small ribosomal subunit;	multicellular organism development; nuclear-transcribed mRNA catabolic process, nonsense-mediated decay; positive regulation of cell proliferation; positive regulation of translation; rRNA processing; SRP-dependent cotranslational protein targeting to membrane; translation; translational initiation; viral transcription;	RNA binding; rRNA binding; structural constituent of ribosome;
IGRGTKVILH	LKEDQTEYLEER	P08238	Q58FF7	Q58FF6	Heat shock protein HSP 90-beta;	9.469	183	724	Heat shock 84 kDa;	apical plasma membrane; aryl hydrocarbon receptor complex; basolateral plasma membrane; brush border membrane; cell surface; cytoplasm; cytosol; extracellular exosome; extracellular region; ficolin-1-rich granule lumen; inclusion body; lysosomal membrane; melanosome; membrane; mitochondrion; nucleoplasm; nucleus; ooplasm; protein complex; secretory granule lumen; sperm head plasma membrane;	cellular response to drug; cellular response to interleukin-4; cellular response to organic cyclic compound; chaperone-mediated protein complex assembly; Fc-gamma receptor signaling pathway involved in phagocytosis; negative regulation of cell cycle arrest; negative regulation of complement-dependent cytotoxicity; negative regulation of neuron apoptotic process; negative regulation of proteasomal…	ATP binding; ATP-dependent protein binding; cadherin binding; CTP binding; dATP binding; disordered domain specific binding; DNA polymerase binding; double-stranded RNA binding; drug binding; glycoprotein binding; GTP binding; heat shock protein binding; histone deacetylase binding; histone methyltransferase binding; ion channel binding; kinase binding; MHC class II protein complex binding; nitri…
PAPQVSNDLL	LKIKDTVLQR	P22102			Trifunctional purine biosynthetic protein adenosine-3;	9.469	246	1010		cytosol; extracellular exosome;	'de novo' IMP biosynthetic process; brainstem development; cerebellum development; cerebral cortex development; glycine metabolic process; purine nucleobase biosynthetic process; purine ribonucleoside monophosphate biosynthetic process; response to inorganic substance; response to organic substance; tetrahydrofolate biosynthetic process;	ATP binding; metal ion binding; phosphoribosylamine-glycine ligase activity; phosphoribosylformylglycinamidine cyclo-ligase activity; phosphoribosylglycinamide formyltransferase activity;
QRQRAILYKR	LKVPPAINQFTQALDR	P62424			60S ribosomal protein L7a;	9.469	72	266	Large ribosomal subunit protein eL8 {ECO:0000303|PubMed:24524803};PLA-X polypeptide;Surfeit locus protein 3;	cytoplasm; cytosol; cytosolic large ribosomal subunit; extracellular exosome; focal adhesion; membrane; nucleolus; nucleus; polysomal ribosome;	maturation of LSU-rRNA; nuclear-transcribed mRNA catabolic process, nonsense-mediated decay; rRNA processing; SRP-dependent cotranslational protein targeting to membrane; translation; translational initiation; viral transcription;	cadherin binding; RNA binding; structural constituent of ribosome;
SGYQQQDSQE	LLAFLLDGLHEDLNR	Q9Y4E8	P35125	Q8NFA0	Ubiquitin carboxyl-terminal hydrolase 15;	9.469	395	963	Deubiquitinating enzyme 15;Ubiquitin thioesterase 15;Ubiquitin-specific-processing protease 15;Unph-2;Unph4;	cytoplasm; cytosol; nucleus;	BMP signaling pathway; histone H2B conserved C-terminal lysine deubiquitination; monoubiquitinated protein deubiquitination; pathway-restricted SMAD protein phosphorylation; protein deubiquitination; transforming growth factor beta receptor signaling pathway; ubiquitin-dependent protein catabolic process;	cysteine-type endopeptidase activity; identical protein binding; SMAD binding; thiol-dependent ubiquitin-specific protease activity; thiol-dependent ubiquitinyl hydrolase activity; transforming growth factor beta receptor binding; ubiquitinated histone binding;
QKHLRKLVPL	LLEDGGEAPAALEAALEEKSALEQMR	Q14204			Cytoplasmic dynein 1 heavy chain 1;	9.469	39	4646	Cytoplasmic dynein heavy chain 1;Dynein heavy chain, cytosolic;	azurophil granule lumen; centrosome; cytoplasmic dynein complex; cytosol; extracellular exosome; extracellular matrix; extracellular region; filopodium; membrane; microtubule;	antigen processing and presentation of exogenous peptide antigen via MHC class II; ciliary basal body docking; cytoplasmic mRNA processing body assembly; ER to Golgi vesicle-mediated transport; establishment of spindle localization; G2/M transition of mitotic cell cycle; microtubule-based movement; mitotic spindle organization; neutrophil degranulation; stress granule assembly;	ATP binding; ATPase activity; dynein light intermediate chain binding; microtubule motor activity; RNA binding;
SSSMADRSSR	LLESLDQLELR	O95816			BAG family molecular chaperone regulator 2;	9.469	26	211	Bcl-2-associated athanogene 2;	cytosol;	protein folding; protein metabolic process; regulation of cellular response to heat;	adenyl-nucleotide exchange factor activity; chaperone binding; identical protein binding;
DVLVSECSAR	LLQQEEEIKSLTAEIDR	P54136			Arginine--tRNA ligase, cytoplasmic;	9.469	10	660	Arginyl-tRNA synthetase;	aminoacyl-tRNA synthetase multienzyme complex; cytoplasm; cytosol; extracellular exosome; membrane; mitochondrion; nucleoplasm; nucleus;	arginyl-tRNA aminoacylation; tRNA aminoacylation for protein translation;	arginine binding; arginine-tRNA ligase activity; ATP binding; cadherin binding; tRNA binding;
YVSNVSKSWL	LMIQQTEQLSR	P16591			Tyrosine-protein kinase Fer;	9.469	71	822	Feline encephalitis virus-related kinase FER;Fujinami poultry sarcoma/Feline sarcoma-related protein Fer;Proto-oncogene c-Fer;Tyrosine kinase 3;p94-Fer;	cell cortex; cell junction; cell projection; cytoplasm; cytoskeleton; cytosol; extrinsic component of cytoplasmic side of plasma membrane; nucleus;	actin cytoskeleton reorganization; cell adhesion; cell differentiation; cell proliferation; cell-cell adhesion mediated by cadherin; cellular response to insulin stimulus; cellular response to macrophage colony-stimulating factor stimulus; cellular response to reactive oxygen species; chemotaxis; cytokine-mediated signaling pathway; diapedesis; extracellular matrix-cell signaling; Fc-epsilon rece…	ATP binding; epidermal growth factor receptor binding; lipid binding; non-membrane spanning protein tyrosine kinase activity; protein phosphatase 1 binding; protein tyrosine kinase activity;
HCDLFPGASY	LMTQIPGTQTESR	Q12774			Rho guanine nucleotide exchange factor 5;	9.469	426	1597	Ephexin-3;Guanine nucleotide regulatory protein TIM;Oncogene TIM;Transforming immortalized mammary oncogene;p60 TIM;	cell junction; cell periphery; cell projection; cytoplasm; cytosol; nucleoplasm; nucleus; plasma membrane; podosome;	actin cytoskeleton organization; intracellular signal transduction; myeloid dendritic cell chemotaxis; positive regulation of apoptotic process; positive regulation of JUN kinase activity; positive regulation of podosome assembly; positive regulation of protein import; positive regulation of sequence-specific DNA binding transcription factor activity; positive regulation of stress fiber assembly;…	GTP binding; guanyl-nucleotide exchange factor activity; lipid binding; Rho guanyl-nucleotide exchange factor activity;
PKPELLAIRF	LNAENAQKFKTKFEECR	P43487			Ran-specific GTPase-activating protein;	9.469	141	201	Ran-binding protein 1;	centrosome; cytoplasm; cytosol; nuclear envelope; nucleus;	G1/S transition of mitotic cell cycle; positive regulation of mitotic centrosome separation; protein import into nucleus; RNA export from nucleus; signal transduction; spindle organization; ubiquitin-dependent protein catabolic process; viral process;	cadherin binding; GDP-dissociation inhibitor activity; GTPase activator activity; Ran GTPase binding;
PTAAHTANFL	LNASGSTSTPAPSR	P53396			ATP-citrate synthase;	9.469	437	1101	ATP-citrate (pro-S-)-lyase;Citrate cleavage enzyme;	azurophil granule lumen; citrate lyase complex; cytosol; extracellular exosome; extracellular region; ficolin-1-rich granule lumen; membrane; nucleoplasm; plasma membrane;	acetyl-CoA biosynthetic process; cholesterol biosynthetic process; citrate metabolic process; fatty acid biosynthetic process; lipid biosynthetic process; long-chain fatty-acyl-CoA biosynthetic process; neutrophil degranulation; oxaloacetate metabolic process; positive regulation of cellular metabolic process;	ATP binding; ATP citrate synthase activity; cofactor binding; metal ion binding;
LQNSQFLLTR	LNDPKMSETER	Q9P0J7			E3 ubiquitin-protein ligase KCMF1;	9.469	294	381	FGF-induced in gastric cancer;Potassium channel modulatory factor;RING-type E3 ubiquitin transferase KCMF1 {ECO:0000305};ZZ-type zinc finger-containing protein 1;	extracellular region; ficolin-1-rich granule lumen;	neutrophil degranulation;	nucleic acid binding; transferase activity; zinc ion binding;
RPAPRNVFDF	LNEKLQGQAPGALEAGAAPAGR	Q8N5A5			Zinc finger CCCH-type with G patch domain-containing protein;	9.469	416	531	G patch domain-containing protein 6;Zinc finger CCCH domain-containing protein 9;Zinc finger and G patch domain-containing protein;	nucleus; plasma membrane;	negative regulation of epidermal growth factor-activated receptor activity; negative regulation of transcription from RNA polymerase II promoter; negative regulation of transcription, DNA-templated; transcription, DNA-templated;	metal ion binding; RNA polymerase II core promoter proximal region sequence-specific DNA binding; sequence-specific DNA binding; transcription factor activity, sequence-specific DNA binding; transcriptional repressor activity, RNA polymerase II core promoter proximal region sequence-specific binding;
MIKSGMNVAR	LNFSHGTHEYHAETIKNVR	P14618			Pyruvate kinase PKM;	9.469	72	531	Cytosolic thyroid hormone-binding protein;Opa-interacting protein 3;Pyruvate kinase 2/3;Pyruvate kinase muscle isozyme;Thyroid hormone-binding protein 1;Tumor M2-PK;p58;	cilium; cytoplasm; cytosol; extracellular exosome; extracellular matrix; extracellular region; extracellular vesicle; ficolin-1-rich granule lumen; mitochondrion; myelin sheath; nucleus; secretory granule lumen; vesicle;	canonical glycolysis; cellular response to insulin stimulus; neutrophil degranulation; programmed cell death;	ATP binding; cadherin binding; kinase activity; magnesium ion binding; MHC class II protein complex binding; potassium ion binding; pyruvate kinase activity; RNA binding;
QELAIHHGWR	LPEYTLSQEGGPAHKR	O75569			Interferon-inducible double-stranded RNA-dependent protein kinase activator A;	9.469	140	313	PKR-associated protein X;PKR-associating protein X;Protein activator of the interferon-induced protein kinase;Protein kinase, interferon-inducible double-stranded RNA-dependent activator;	cytoplasm; cytosol; membrane; nucleoplasm; perinuclear region of cytoplasm; RISC-loading complex;	cellular response to oxidative stress; gene silencing by RNA; immune response; middle ear morphogenesis; negative regulation of cell proliferation; outer ear morphogenesis; positive regulation of intrinsic apoptotic signaling pathway; pre-miRNA processing; production of miRNAs involved in gene silencing by miRNA; production of siRNA involved in RNA interference; protein phosphorylation; protein s…	double-stranded RNA binding; enzyme activator activity; enzyme binding; identical protein binding; protein homodimerization activity; RNA binding;
RGSRGGTRGW	LPSQEGHLDDGGYTPDLKMSYSR	P0C7P1	A6NDE4	A6NEQ0	RNA-binding motif protein, Y chromosome, family 1 member D;	9.469	121	496		nucleus;	mRNA processing; RNA splicing;	RNA binding;
LWDPTKVPPR	LQAVTDDHIR	P30043			Flavin reductase (NADPH);	9.469	123	206	Biliverdin reductase B;Biliverdin-IX beta-reductase;Green heme-binding protein;NADPH-dependent diaphorase;NADPH-flavin reductase;	cytosol; extracellular exosome; nucleoplasm; plasma membrane; terminal bouton;	heme catabolic process;	biliverdin reductase activity; riboflavin reductase (NADPH) activity;
AGDVDMSLSL	LQEISSLQEKLEVTR	P30622			CAP-Gly domain-containing linker protein 1;	9.469	547	1438	Cytoplasmic linker protein 1;Cytoplasmic linker protein 170 alpha-2;Reed-Sternberg intermediate filament-associated protein;Restin;	centrosome; cytoplasmic microtubule; cytoplasmic vesicle membrane; cytosol; endosome; intermediate filament; kinetochore; microtubule; microtubule cytoskeleton; microtubule plus-end; nuclear envelope; ruffle;	microtubule bundle formation; mitotic nuclear division; positive regulation of microtubule polymerization; protein transport into plasma membrane raft; sister chromatid cohesion;	metal ion binding; microtubule binding; microtubule plus-end binding; protein homodimerization activity; tubulin binding; zinc ion binding;
RLKLLEEERR	LQGQLEQGDDTAAER	Q8NE71			ATP-binding cassette sub-family F member 1;	9.469	395	845	ATP-binding cassette 50;TNF-alpha-stimulated ABC protein;	cytoplasm; cytosol; membrane; nuclear envelope; nucleoplasm; polysomal ribosome; ribosome;	inflammatory response; positive regulation of translation; translation; translational initiation; transmembrane transport;	ATP binding; ATPase activity; ribosome binding; RNA binding; translation activator activity; translation factor activity, RNA binding;
KTLFGKMMDY	LQGSGETPQTDVR	Q14697			Neutral alpha-glucosidase AB;	9.469	340	944	Alpha-glucosidase 2;Glucosidase II subunit alpha;	endoplasmic reticulum lumen; extracellular exosome; extracellular matrix; glucosidase II complex; Golgi apparatus; melanosome; membrane;	carbohydrate metabolic process; protein folding;	carbohydrate binding; glucan 1,3-alpha-glucosidase activity; RNA binding;
EENQKSYGER	LQLQDEEDDSLCR	Q969K3			E3 ubiquitin-protein ligase RNF34 {ECO:0000305};	9.469	312	372	Caspase regulator CARP1 {ECO:0000305};Caspases-8 and -10-associated RING finger protein 1 {ECO:0000303|PubMed:15069192};FYVE-RING finger protein Momo {ECO:0000250|UniProtKB:Q6AYH3};Human RING finger homologous to inhibitor of apoptosis protein {ECO:0000303|PubMed:12118383};RING finger protein 34 {ECO:0000312|HGNC:HGNC:17297};RING finger protein RIFF {ECO:0000303|Ref.2};RING-type E3 ubiquitin tran…	cytoplasm; cytosol; endomembrane system; nuclear body; nuclear speck; nucleoplasm; nucleus; plasma membrane;	apoptotic process; cellular response to cold; negative regulation of cysteine-type endopeptidase activity involved in execution phase of apoptosis; negative regulation of extrinsic apoptotic signaling pathway via death domain receptors; negative regulation of signal transduction by p53 class mediator; nucleotide-binding domain, leucine rich repeat containing receptor signaling pathway; proteasome…	p53 binding; phosphatidylinositol phosphate binding; ubiquitin protein ligase activity; ubiquitin protein ligase binding; zinc ion binding;
TMKAGQCVIG	LQMGTNKCASQSGMTAYGTR	Q99439			Calponin-2;	9.469	166	309	Calponin H2, smooth muscle;Neutral calponin;	cell-cell junction; cytoskeleton; extracellular exosome; extracellular region; focal adhesion; membrane; specific granule lumen; stress fiber; tertiary granule lumen;	actomyosin structure organization; cellular response to mechanical stimulus; cytoskeleton organization; neutrophil degranulation; regulation of actin filament-based process;	actin binding; cadherin binding; calmodulin binding;
TVTTGMTTTL	LQPIAVASLSTNTEQDR	Q6P1L5			Protein FAM117B;	9.469	545	589	Amyotrophic lateral sclerosis 2 chromosomal region candidate gene 13 protein;
QQNPALLPAL	LQQLGQENPQLLQQISR	P54725			UV excision repair protein RAD23 homolog A;	9.469	257	363		cytoplasm; cytosol; microtubule organizing center; nucleoplasm; nucleus; proteasome complex; protein complex;	nucleotide-excision repair; positive regulation of cell cycle; positive regulation of proteasomal ubiquitin-dependent protein catabolic process; positive regulation of viral genome replication; proteasome-mediated ubiquitin-dependent protein catabolic process; protein destabilization; protein deubiquitination; regulation of proteasomal ubiquitin-dependent protein catabolic process; viral process;	damaged DNA binding; kinase binding; polyubiquitin binding; single-stranded DNA binding; ubiquitin-specific protease binding;
DESTGSIAKR	LQSIGTENTEENRR	P04075			Fructose-bisphosphate aldolase A;	9.469	42	364	Lung cancer antigen NY-LU-1;Muscle-type aldolase;	actin cytoskeleton; cytosol; extracellular exosome; extracellular region; extracellular space; ficolin-1-rich granule lumen; I band; M band; membrane; nucleus; platelet alpha granule lumen; secretory granule lumen; tertiary granule lumen;	actin filament organization; ATP biosynthetic process; canonical glycolysis; fructose 1,6-bisphosphate metabolic process; fructose metabolic process; gluconeogenesis; glycolytic process; muscle cell cellular homeostasis; neutrophil degranulation; platelet degranulation; protein homotetramerization; regulation of cell shape; striated muscle contraction;	actin binding; cadherin binding; cytoskeletal protein binding; fructose binding; fructose-bisphosphate aldolase activity; identical protein binding; RNA binding; tubulin binding;
ELLDSPGKVL	LQSKDQITAGNAAR	P22234			Multifunctional protein ADE2;	9.469	31	425		cytoplasm; cytosol; extracellular exosome; membrane;	'de novo' IMP biosynthetic process; purine nucleobase biosynthetic process; purine ribonucleoside monophosphate biosynthetic process;	ATP binding; cadherin binding; identical protein binding; phosphoribosylaminoimidazole carboxylase activity; phosphoribosylaminoimidazolesuccinocarboxamide synthase activity;
VPTTASRFAL	LQVDSGSGSDSEPGKGKGR	Q5VSY0			G kinase-anchoring protein 1;	9.469	17	366	cGMP-dependent protein kinase-anchoring protein of 42 kDa;	Golgi apparatus;	signal transduction;	identical protein binding;
PEIPALLDGR	LQVVDQPLPVR	P49327			Fatty acid synthase;	9.469	372	2511		cytosol; extracellular exosome; glycogen granule; Golgi apparatus; melanosome; membrane; mitochondrion; plasma membrane;	acetyl-CoA metabolic process; cellular response to interleukin-4; fatty acid biosynthetic process; fatty acid metabolic process; long-chain fatty-acyl-CoA biosynthetic process; mammary gland development; osteoblast differentiation; pantothenate metabolic process; positive regulation of cellular metabolic process;	3-hydroxyoctanoyl-[acyl-carrier-protein] dehydratase activity; 3-hydroxypalmitoyl-[acyl-carrier-protein] dehydratase activity; 3-oxo-pimeloyl-[acp] methyl ester reductase activity; 3-oxoacyl-[acyl-carrier-protein] reductase (NADPH) activity; 3-oxoacyl-[acyl-carrier-protein] synthase activity; [acyl-carrier-protein] S-acetyltransferase activity; [acyl-carrier-protein] S-malonyltransferase activity…
EMALDPELLL	LRDDGEEEFAGAKLEDSEVR	Q8N163			Cell cycle and apoptosis regulator protein 2;	9.469	653	923	Cell division cycle and apoptosis regulator protein 2;DBIRD complex subunit KIAA1967;Deleted in breast cancer gene 1 protein;NET35;p30 DBC;	cytoplasm; DBIRD complex; mitochondrial matrix; nuclear chromatin; nucleoplasm; nucleus;	cell cycle; cellular response to DNA damage stimulus; mitochondrial fragmentation involved in apoptotic process; mRNA processing; negative regulation of catalytic activity; negative regulation of cell growth; negative regulation of intrinsic apoptotic signaling pathway in response to DNA damage; negative regulation of proteasomal ubiquitin-dependent protein catabolic process; negative regulation …	enzyme binding; enzyme inhibitor activity; RNA binding; RNA polymerase II core binding;
EEKRVLGLVL	LRGENLVSMTVEGPPPKDTGIAR	P14678	P63162		Small nuclear ribonucleoprotein-associated proteins B and B';	9.469	70	240	Sm protein B/B';	catalytic step 2 spliceosome; cytosol; extracellular exosome; histone pre-mRNA 3'end processing complex; methylosome; nucleoplasm; small nuclear ribonucleoprotein complex; SMN-Sm protein complex; spliceosomal complex; U1 snRNP; U12-type spliceosomal complex; U2 snRNP; U2-type prespliceosome; U4 snRNP; U4/U6 x U5 tri-snRNP complex; U5 snRNP; U7 snRNP;	histone mRNA metabolic process; mRNA splicing, via spliceosome; nuclear import; protein methylation; RNA splicing; spliceosomal snRNP assembly; termination of RNA polymerase II transcription;	histone pre-mRNA DCP binding; RNA binding; telomerase RNA binding; U2 snRNA binding;
ALNRQRLCER	LRKNPAVQAGSIVVLQGGEETQR	P12955			Xaa-Pro dipeptidase;	9.469	32	493	Imidodipeptidase;Peptidase D;Proline dipeptidase;	extracellular exosome;	cellular amino acid metabolic process; collagen catabolic process; proteolysis;	aminopeptidase activity; manganese ion binding; metallocarboxypeptidase activity; proline dipeptidase activity;
KIWHHTFYNE	LRVAPEEHPVLLTEAPLNPKANR	P60709	P63261		Actin, cytoplasmic 1;	9.469	92	375	Beta-actin;	blood microparticle; cortical cytoskeleton; cytoplasm; cytoplasmic ribonucleoprotein granule; cytoskeleton; cytosol; dense body; extracellular exosome; extracellular space; focal adhesion; intracellular ribonucleoprotein complex; membrane; myelin sheath; NuA4 histone acetyltransferase complex; nuclear chromatin; nucleoplasm; plasma membrane; protein complex; vesicle;	ATP-dependent chromatin remodeling; cell junction assembly; ephrin receptor signaling pathway; Fc-gamma receptor signaling pathway involved in phagocytosis; membrane organization; movement of cell or subcellular component; platelet aggregation; positive regulation of gene expression, epigenetic; postsynaptic actin cytoskeleton organization; protein deubiquitination; retina homeostasis; substantia…	ATP binding; identical protein binding; kinesin binding; nitric-oxide synthase binding; structural constituent of cytoskeleton; structural constituent of postsynaptic actin cytoskeleton; Tat protein binding;
TAASSTSLVA	LSAEATPATTGVPDAR	P35658			Nuclear pore complex protein Nup214;	9.469	1561	2090	214 kDa nucleoporin;Nucleoporin Nup214;Protein CAN;	cytoplasmic side of nuclear pore; cytosol; focal adhesion; intracellular membrane-bounded organelle; nuclear pore central transport channel; nuclear pore nuclear basket; nucleoplasm; nucleus;	gene silencing by RNA; intracellular transport of virus; mitotic nuclear envelope disassembly; mRNA export from nucleus; protein export from nucleus; protein import into nucleus; protein sumoylation; regulation of cell cycle; regulation of cellular response to heat; regulation of glucose transport; regulation of mRNA stability; RNA export from nucleus; tRNA export from nucleus; viral process; vir…	nuclear export signal receptor activity; nuclear localization sequence binding; structural constituent of nuclear pore;
DNIQTPESVL	LSAVSGEDTQDR	Q14152			Eukaryotic translation initiation factor 3 subunit A {ECO:0000255|HAMAP-Rule:MF_03000};	9.469	127	1382	Eukaryotic translation initiation factor 3 subunit 10 {ECO:0000255|HAMAP-Rule:MF_03000};eIF-3-theta {ECO:0000255|HAMAP-Rule:MF_03000};eIF3 p167;eIF3 p180;eIF3 p185;	cytoplasm; cytosol; eukaryotic translation initiation factor 3 complex; eukaryotic translation initiation factor 3 complex, eIF3e; eukaryotic translation initiation factor 3 complex, eIF3m; membrane; microtubule; multi-eIF complex; nucleolus; nucleus;	formation of cytoplasmic translation initiation complex; IRES-dependent viral translational initiation; negative regulation of ERK1 and ERK2 cascade; translation reinitiation; translational initiation; viral translational termination-reinitiation;	mRNA binding; receptor tyrosine kinase binding; RNA binding; structural molecule activity; translation initiation factor activity;
EAEPSPLGLL	LSCGSGSAAPAPGVGQQR	P35790			Choline kinase alpha;	9.469	18	457	CHETK-alpha;Ethanolamine kinase;	cytosol;	choline metabolic process; ethanolamine metabolic process; lipid metabolic process; lipid transport; phosphatidylcholine biosynthetic process; phosphatidylethanolamine biosynthetic process; response to 3-methylcholanthrene; response to toxic substance;	ATP binding; choline binding; choline kinase activity; cholinesterase activity; drug binding; ethanolamine kinase activity; protein homodimerization activity; signal transducer activity;
TINNISKQIY	LSENPEETAAR	Q9UKG1			DCC-interacting protein 13-alpha;	9.469	377	709	Adapter protein containing PH domain, PTB domain and leucine zipper motif 1;	cytoplasm; cytosol; early endosome; early endosome membrane; endosome membrane; extracellular exosome; nucleus; vesicle membrane;	cell cycle; cell proliferation; extrinsic apoptotic signaling pathway in absence of ligand; insulin receptor signaling pathway; regulation of establishment of protein localization to plasma membrane; regulation of glucose import; signal transduction;	identical protein binding; protein kinase B binding;
TGSNFSFKSA	LSPSKSPAKLNQSGTSVGTDEESDVTQEEER	P49792	Q7Z3J3		E3 SUMO-protein ligase RanBP2;	9.469	1298	1758	358 kDa nucleoporin;Nuclear pore complex protein Nup358;Nucleoporin Nup358;Ran-binding protein 2;p270;	annulate lamellae; centrosome; cytoplasm; cytosol; intracellular membrane-bounded organelle; membrane; nuclear envelope; nuclear inclusion body; nuclear membrane; nuclear pore; nuclear pore cytoplasmic filaments; nuclear pore nuclear basket;	centrosome localization; G1/S transition of mitotic cell cycle; gene silencing by RNA; intracellular transport of virus; mitotic nuclear envelope disassembly; mRNA export from nucleus; NLS-bearing protein import into nucleus; positive regulation of GTPase activity; positive regulation of mitotic centrosome separation; protein folding; protein sumoylation; regulation of cellular response to heat; …	ligase activity; peptidyl-prolyl cis-trans isomerase activity; Ran GTPase binding; RNA binding; SUMO transferase activity; zinc ion binding;
MGAY	LSQPNTVKCSGDGVGAPR	O15355			Protein phosphatase 1G;	9.469	3	546	Protein phosphatase 1C;Protein phosphatase 2C isoform gamma;Protein phosphatase magnesium-dependent 1 gamma;	cytoplasm; membrane; nucleoplasm; nucleus;	cell cycle arrest; peptidyl-threonine dephosphorylation; protein dephosphorylation;	metal ion binding; protein serine/threonine phosphatase activity;
YSKIFEQKDR	LSQSKASKELVER	P55884			Eukaryotic translation initiation factor 3 subunit B {ECO:0000255|HAMAP-Rule:MF_03001};	9.469	735	814	Eukaryotic translation initiation factor 3 subunit 9 {ECO:0000255|HAMAP-Rule:MF_03001};Prt1 homolog;eIF-3-eta {ECO:0000255|HAMAP-Rule:MF_03001};eIF3 p110 {ECO:0000255|HAMAP-Rule:MF_03001};eIF3 p116;	cytosol; eukaryotic translation initiation factor 3 complex; eukaryotic translation initiation factor 3 complex, eIF3m; extracellular exosome;	IRES-dependent viral translational initiation; regulation of translational initiation; translational initiation; viral translational termination-reinitiation;	protein complex scaffold; RNA binding; translation initiation factor activity; translation initiation factor binding;
DRNTESLFEE	LSSAGSGLIGDVDEGADLLGMGR	O60271			C-Jun-amino-terminal kinase-interacting protein 4;	9.469	384	1321	Cancer/testis antigen 89;Human lung cancer oncogene 6 protein;JNK-associated leucine-zipper protein;Mitogen-activated protein kinase 8-interacting protein 4;Proliferation-inducing protein 6;Protein highly expressed in testis;Sperm surface protein;Sperm-associated antigen 9;Sperm-specific protein;Sunday driver 1;	acrosomal vesicle; cytoplasm; cytosol; extracellular exosome; integral component of membrane; microtubule organizing center; perinuclear region of cytoplasm;	activation of JUN kinase activity; negative regulation of protein homodimerization activity; positive regulation of cell migration; positive regulation of muscle cell differentiation; positive regulation of neuron differentiation; protein homooligomerization; retrograde transport, endosome to Golgi; spermatogenesis; striated muscle cell differentiation;	JUN kinase binding; kinesin binding; MAP-kinase scaffold activity; mitogen-activated protein kinase p38 binding; receptor signaling complex scaffold activity;
AEKVAEKLEA	LSVKEETKEDAEEK	P43487			Ran-specific GTPase-activating protein;	9.469	185	201	Ran-binding protein 1;	centrosome; cytoplasm; cytosol; nuclear envelope; nucleus;	G1/S transition of mitotic cell cycle; positive regulation of mitotic centrosome separation; protein import into nucleus; RNA export from nucleus; signal transduction; spindle organization; ubiquitin-dependent protein catabolic process; viral process;	cadherin binding; GDP-dissociation inhibitor activity; GTPase activator activity; Ran GTPase binding;
MAELSEEAL	LSVLPTIR	P45974			Ubiquitin carboxyl-terminal hydrolase 5;	9.469	8	858	Deubiquitinating enzyme 5;Isopeptidase T;Ubiquitin thioesterase 5;Ubiquitin-specific-processing protease 5;	cytosol; lysosome;	positive regulation of proteasomal ubiquitin-dependent protein catabolic process; protein deubiquitination; protein K48-linked deubiquitination; protein ubiquitination; ubiquitin-dependent protein catabolic process;	cysteine-type endopeptidase activity; thiol-dependent ubiquitin-specific protease activity; thiol-dependent ubiquitinyl hydrolase activity; ubiquitin binding; zinc ion binding;
HQPISLLGSF	LTEESPDKEIDQNSQQEESR	Q12774			Rho guanine nucleotide exchange factor 5;	9.469	468	1597	Ephexin-3;Guanine nucleotide regulatory protein TIM;Oncogene TIM;Transforming immortalized mammary oncogene;p60 TIM;	cell junction; cell periphery; cell projection; cytoplasm; cytosol; nucleoplasm; nucleus; plasma membrane; podosome;	actin cytoskeleton organization; intracellular signal transduction; myeloid dendritic cell chemotaxis; positive regulation of apoptotic process; positive regulation of JUN kinase activity; positive regulation of podosome assembly; positive regulation of protein import; positive regulation of sequence-specific DNA binding transcription factor activity; positive regulation of stress fiber assembly;…	GTP binding; guanyl-nucleotide exchange factor activity; lipid binding; Rho guanyl-nucleotide exchange factor activity;
AQLNEEAKRR	LTEQKGEQQIQKAR	Q9Y5B9			FACT complex subunit SPT16;	9.469	491	1047	Chromatin-specific transcription elongation factor 140 kDa subunit;FACT 140 kDa subunit;FACTp140;Facilitates chromatin transcription complex subunit SPT16;	chromosome; FACT complex; nucleoplasm; nucleus;	DNA repair; DNA replication; DNA replication-independent nucleosome organization; nucleosome disassembly; positive regulation of DNA-templated transcription, elongation; positive regulation of transcription elongation from RNA polymerase II promoter; regulation of signal transduction by p53 class mediator; transcription elongation from RNA polymerase II promoter; transcription from RNA polymerase…	histone binding; nucleosome binding; RNA binding;
REGLGRMESF	LTLESEKSDFPPTPVAEVAPKAQEGESTLEIR	O95359			Transforming acidic coiled-coil-containing protein 2;	9.469	712	2948	Anti-Zuai-1;	cytoplasm; cytosol; microtubule cytoskeleton; microtubule organizing center; nucleoplasm; plasma membrane;	cell proliferation; cerebral cortex development; microtubule cytoskeleton organization;	nuclear hormone receptor binding;
KLFKDDIRYL	LTMDKLWR	Q9UBT2			SUMO-activating enzyme subunit 2;	9.469	265	640	Anthracycline-associated resistance ARX;Ubiquitin-like 1-activating enzyme E1B;Ubiquitin-like modifier-activating enzyme 2;	cytoplasm; nucleoplasm; SUMO activating enzyme complex;	protein sumoylation;	ATP binding; enzyme activator activity; magnesium ion binding; protein heterodimerization activity; small protein activating enzyme binding; SUMO activating enzyme activity; SUMO binding; transcription factor binding; ubiquitin-like protein conjugating enzyme binding;
APGPINFTMF	LTMFGEKLNGTDPEDVIR	P19105	O14950	P24844	Myosin regulatory light chain 12A;	9.469	85	172	Epididymis secretory protein Li 24;MLC-2B;Myosin RLC;Myosin regulatory light chain 2, nonsarcomeric;Myosin regulatory light chain MRLC3;	cytosol; extracellular exosome; myosin complex;	ephrin receptor signaling pathway; muscle contraction; platelet aggregation;	calcium ion binding;
ILQEAQNLMA	LTNVDTPLKGGLNTPLHESDFSGVTPQR	Q99459			Cell division cycle 5-like protein;	9.469	370	802	Pombe cdc5-related protein;	catalytic step 2 spliceosome; cytoplasm; membrane; nuclear speck; nucleoplasm; nucleus; perinuclear region of cytoplasm; protein-DNA complex; Prp19 complex;	cell differentiation; cellular response to fibroblast growth factor stimulus; cellular response to interleukin-2; cellular response to nerve growth factor stimulus; cellular response to prolactin; cellular response to wortmannin; DNA repair; mitotic cell cycle; mRNA splicing, via spliceosome; regulation of transcription from RNA polymerase II promoter; signal transduction involved in DNA damage c…	DNA binding; leucine zipper domain binding; protein kinase binding; protein phosphatase 1 binding; RNA binding; RNA polymerase II transcription factor activity, sequence-specific DNA binding; sequence-specific DNA binding; transcription corepressor binding; transcription factor activity, RNA polymerase II transcription factor recruiting; transcription regulatory region DNA binding; WD40-repeat do…
EQQKKRLEAF	LTQKAKVGELKDDDFER	P36507			Dual specificity mitogen-activated protein kinase kinase 2;	9.469	56	400	ERK activator kinase 2;MAPK/ERK kinase 2;	cell-cell junction; cytoplasmic side of plasma membrane; cytosol; early endosome; endoplasmic reticulum; extracellular region; focal adhesion; Golgi apparatus; late endosome; microtubule; mitochondrion; nucleus; perinuclear region of cytoplasm; peroxisomal membrane; plasma membrane;	activation of MAPK activity; ERK1 and ERK2 cascade; MAPK cascade; negative regulation of gene expression; peptidyl-serine autophosphorylation; positive regulation of ERK1 and ERK2 cascade; positive regulation of production of miRNAs involved in gene silencing by miRNA; positive regulation of protein serine/threonine kinase activity; positive regulation of transcription, DNA-templated; proteolysis…	ATP binding; MAP kinase kinase activity; metal ion binding; PDZ domain binding; protein serine/threonine kinase activator activity; protein serine/threonine kinase activity; protein serine/threonine/tyrosine kinase activity; protein tyrosine kinase activity; scaffold protein binding; signal transducer, downstream of receptor, with serine/threonine kinase activity;
EESLECLCRL	LTTIGKDLDFEKAKPR	Q04637	O43432		Eukaryotic translation initiation factor 4 gamma 1;	9.469	937	1599	p220;	cytoplasm; cytosol; eukaryotic translation initiation factor 4F complex; membrane; nucleus; polysome;	behavioral fear response; cap-dependent translational initiation; cellular macromolecule biosynthetic process; developmental process; mitochondrion organization; negative regulation of autophagy; negative regulation of neuron death; negative regulation of peptidyl-threonine phosphorylation; nuclear-transcribed mRNA catabolic process, nonsense-mediated decay; nuclear-transcribed mRNA poly(A) tail …	ATP binding; cadherin binding; eukaryotic initiation factor 4E binding; mRNA binding; protein complex scaffold; RNA binding; translation factor activity, RNA binding; translation initiation factor activity; translation initiation factor binding;
RARVECQSHR	LTVEDPVTVEYITR	Q8TAA3	O14818		Proteasome subunit alpha type-7-like;	9.469	94	248		cytosol; extracellular exosome; nucleus; proteasome core complex, alpha-subunit complex; spermatoproteasome complex;	anaphase-promoting complex-dependent catabolic process; antigen processing and presentation of exogenous peptide antigen via MHC class I, TAP-dependent; Fc-epsilon receptor signaling pathway; MAPK cascade; negative regulation of canonical Wnt signaling pathway; negative regulation of G2/M transition of mitotic cell cycle; NIK/NF-kappaB signaling; positive regulation of canonical Wnt signaling pat…	threonine-type endopeptidase activity;
VGALRSCQMN	LVADLVQEVQQAR	Q13158			FAS-associated death domain protein;	9.469	170	208	FAS-associating death domain-containing protein;Growth-inhibiting gene 3 protein;Mediator of receptor induced toxicity;Protein FADD;	CD95 death-inducing signaling complex; cell body; cytoplasm; cytosol; death-inducing signaling complex; membrane raft; neuron projection; nucleus; plasma membrane; ripoptosome;	activation of cysteine-type endopeptidase activity; activation of cysteine-type endopeptidase activity involved in apoptotic process; activation of cysteine-type endopeptidase activity involved in apoptotic signaling pathway; apoptotic process; apoptotic signaling pathway; behavioral response to cocaine; cell surface receptor signaling pathway; cellular response to mechanical stimulus; death-indu…	caspase binding; death effector domain binding; death receptor binding; identical protein binding; protease binding; protein complex binding; receptor serine/threonine kinase binding; tumor necrosis factor receptor binding; tumor necrosis factor receptor superfamily binding;
MCEEETTA	LVCDNGSGLCKAGFAGDDAPR	P62736	P63267		Actin, aortic smooth muscle;	9.469	7	376	Alpha-actin-2;Cell growth-inhibiting gene 46 protein;	actin cytoskeleton; cell body; cytoplasm; cytosol; extracellular exosome; extracellular space; filopodium; lamellipodium; protein complex; smooth muscle contractile fiber;	glomerular mesangial cell development; mesenchyme migration; muscle contraction; positive regulation of gene expression; regulation of blood pressure; response to virus; vascular smooth muscle contraction;	ATP binding; protein kinase binding;
QVARMEKLAG	LVEELEADEWR	Q96DE5			Anaphase-promoting complex subunit 16;	9.469	83	110	Cyclosome subunit 16;	anaphase-promoting complex; condensed chromosome kinetochore; cytosol; kinetochore; nucleoplasm;	anaphase-promoting complex-dependent catabolic process; cell division; mitotic nuclear division; negative regulation of ubiquitin-protein ligase activity involved in mitotic cell cycle; positive regulation of ubiquitin-protein ligase activity involved in regulation of mitotic cell cycle transition; proteasome-mediated ubiquitin-dependent protein catabolic process; protein ubiquitination; protein …
GALQEASEAY	LVGLFEDTNLCAIHAKR	Q71DI3	P68431	P84243	Histone H3.2;	9.469	99	136	Histone H3/m;Histone H3/o;	extracellular exosome; extracellular region; nucleoplasm; nucleosome; nucleus;	blood coagulation; cellular protein metabolic process; chromatin organization; chromatin silencing at rDNA; gene silencing by RNA; negative regulation of gene expression, epigenetic; negative regulation of transcription from RNA polymerase II promoter; nucleosome assembly; positive regulation of gene expression, epigenetic;	chromatin binding; DNA binding; histone binding; protein heterodimerization activity;
DVAPQAPVHF	LVIPKKPIPR	Q9BX68			Histidine triad nucleotide-binding protein 2, mitochondrial;	9.469	88	163	HINT-3;HIT-17kDa;PKCI-1-related HIT protein;	mitochondrion; nucleolus;	apoptotic process; multicellular organismal lipid catabolic process; negative regulation of peptidyl-lysine acetylation; steroid biosynthetic process;	hydrolase activity; nucleotide binding;
LGYDETIKAE	LVLIDEDDEKSLR	Q8IXS6			Paralemmin-2;	9.469	306	379		plasma membrane;	regulation of cell shape;
DKAYVVLGQF	LVLKKDEDLFR	O75531			Barrier-to-autointegration factor;	9.469	48	89	Breakpoint cluster region protein 1;	condensed chromosome; cytoplasm; cytosol; extracellular exosome; nucleoplasm; nucleus;	DNA integration; establishment of integrated proviral latency; mitotic nuclear envelope disassembly; mitotic nuclear envelope reassembly; negative regulation of viral genome replication; nuclear transport; response to virus;	DNA binding; enzyme binding; LEM domain binding; protein C-terminus binding; protein homodimerization activity; protein N-terminus binding;
CSGERTYQEL	LVNQNPIAQPLASR	Q9NX24			H/ACA ribonucleoprotein complex subunit 2;	9.469	26	153	Nucleolar protein family A member 2;snoRNP protein NHP2;	box H/ACA scaRNP complex; box H/ACA snoRNP complex; box H/ACA telomerase RNP complex; nuclear chromosome, telomeric region; nucleoplasm; small nucleolar ribonucleoprotein complex; telomerase holoenzyme complex;	cleavage involved in rRNA processing; maturation of LSU-rRNA; positive regulation of telomerase RNA localization to Cajal body; rRNA pseudouridine synthesis; snRNA pseudouridine synthesis; telomere maintenance via telomerase; translation;	box H/ACA snoRNA binding; RNA binding; snoRNA binding; telomerase RNA binding;
AEEDTELRDL	LVQTLENSGVLNR	O95684			FGFR1 oncogene partner;	9.469	18	399		centrosome; cytosol; nucleus; perinuclear region of cytoplasm;	ciliary basal body docking; G2/M transition of mitotic cell cycle; microtubule anchoring; negative regulation of protein kinase activity; positive regulation of cell growth; positive regulation of cell migration; positive regulation of cell proliferation;	protein homodimerization activity; protein kinase binding; protein tyrosine kinase activity; protein tyrosine kinase inhibitor activity;
YNPRIRVESL	LVTAISKASAQQR	O43143			Pre-mRNA-splicing factor ATP-dependent RNA helicase DHX15;	9.469	455	795	ATP-dependent RNA helicase #46;DEAH box protein 15;	cytoplasm; nuclear speck; nucleolus; nucleoplasm; nucleus; U12-type spliceosomal complex;	mRNA processing; mRNA splicing, via spliceosome; response to alkaloid; response to toxic substance; RNA splicing;	ATP binding; ATP-dependent RNA helicase activity; double-stranded RNA binding; RNA binding; RNA helicase activity;
TYDKYYQTPR	LWLFGYDEQR	Q9NT62			Ubiquitin-like-conjugating enzyme ATG3;	9.469	213	314	Autophagy-related protein 3;Protein PC3-96;	cytoplasmic ubiquitin ligase complex; cytosol;	autophagosome assembly; cellular protein modification process; macroautophagy; mitochondrial fragmentation involved in apoptotic process; mitophagy; negative regulation of phagocytosis; nucleophagy; protein targeting to membrane; protein ubiquitination; regulation of cilium assembly;	Atg12 transferase activity; Atg8 ligase activity; enzyme binding; ligase activity; ubiquitin-like protein transferase activity;
SRTPGNRIVY	LYTKKVGKAPKSACGVCPGR	P49207			60S ribosomal protein L34;	9.469	31	117	Large ribosomal subunit protein eL34 {ECO:0000303|PubMed:24524803};	cytosol; cytosolic large ribosomal subunit; extracellular exosome; mitochondrion;	nuclear-transcribed mRNA catabolic process, nonsense-mediated decay; ribosome biogenesis; rRNA processing; SRP-dependent cotranslational protein targeting to membrane; translation; translational initiation; viral transcription;	cadherin binding; RNA binding; structural constituent of ribosome;
TLAHHLKQER	LYVNSEKQLIQR	Q14C86			GTPase-activating protein and VPS9 domain-containing protein 1;	9.469	16	1478	GAPex-5;Rab5-activating protein 6;	cytosol; endosome; membrane;	endocytosis; membrane organization; regulation of protein transport; signal transduction;	cadherin binding; GTPase activating protein binding; GTPase activator activity; guanyl-nucleotide exchange factor activity; Rab guanyl-nucleotide exchange factor activity;
VHPGLELPLM	MAKEKPPITVVGDVGGR	Q14558			Phosphoribosyl pyrophosphate synthase-associated protein 1;	9.469	232	356	39 kDa phosphoribosypyrophosphate synthase-associated protein;		nucleobase-containing compound metabolic process; nucleotide biosynthetic process;	enzyme inhibitor activity; identical protein binding; magnesium ion binding; ribose phosphate diphosphokinase activity;
HNVKELEVLL	MCNKSYCAEIAHNVSSKNR	P62910			60S ribosomal protein L32;	9.469	88	135	Large ribosomal subunit protein eL32 {ECO:0000303|PubMed:24524803};	cytosol; cytosolic large ribosomal subunit; membrane;	cellular response to dexamethasone stimulus; liver regeneration; nuclear-transcribed mRNA catabolic process, nonsense-mediated decay; rRNA processing; SRP-dependent cotranslational protein targeting to membrane; translation; translational initiation; viral transcription;	RNA binding; structural constituent of ribosome;
QETYTPRLIL	MDLKGSLSSLKEEGGLYR	Q9BUK6			Protein misato homolog 1;	9.469	68	570		cytoplasm; mitochondrial outer membrane;	mitochondrion distribution; mitochondrion organization;	GTPase activity;
YDVMGMGRME	MELDYAEDATER	Q9UKJ3			G patch domain-containing protein 8;	9.469	84	1502				metal ion binding; RNA binding;
KKPKFELGKL	MELHGEGSSSGKATGDETGAKVER	P61247			40S ribosomal protein S3a {ECO:0000255|HAMAP-Rule:MF_03122};	9.469	227	264	Small ribosomal subunit protein eS1 {ECO:0000303|PubMed:24524803};v-fos transformation effector protein;	cytoplasm; cytosol; cytosolic small ribosomal subunit; endoplasmic reticulum; extracellular exosome; extracellular matrix; focal adhesion; intracellular ribonucleoprotein complex; nucleolus; nucleoplasm; nucleus;	cell differentiation; negative regulation of apoptotic process; nuclear-transcribed mRNA catabolic process, nonsense-mediated decay; rRNA processing; SRP-dependent cotranslational protein targeting to membrane; translation; translational initiation; viral transcription;	mRNA 5'-UTR binding; RNA binding; structural constituent of ribosome;
LIGENEKAER	MGFTEVTPVTGASLR	P55265			Double-stranded RNA-specific adenosine deaminase;	9.469	800	1226	136 kDa double-stranded RNA-binding protein;Interferon-inducible protein 4;K88DSRBP;	cytoplasm; membrane; nucleolus; nucleoplasm; nucleus; supraspliceosomal complex;	adenosine to inosine editing; base conversion or substitution editing; cellular response to virus; defense response to virus; definitive hemopoiesis; erythrocyte differentiation; hematopoietic progenitor cell differentiation; hematopoietic stem cell homeostasis; in utero embryonic development; innate immune response; miRNA loading onto RISC involved in gene silencing by miRNA; mRNA processing; ne…	DNA binding; double-stranded RNA adenosine deaminase activity; metal ion binding; RNA binding;
TKFHRIIKDF	MIQGGDPTGTGR	Q9Y3C6			Peptidyl-prolyl cis-trans isomerase-like 1;	9.469	59	166	Rotamase PPIL1;	catalytic step 2 spliceosome; extracellular exosome; nucleoplasm;	mRNA splicing, via spliceosome; protein folding;	disordered domain specific binding; peptidyl-prolyl cis-trans isomerase activity;
DSILNKVEER	MKELSQDSTGR	P52788			Spermine synthase;	9.469	95	366	Spermidine aminopropyltransferase;	cytosol; extracellular exosome;	methionine metabolic process; polyamine metabolic process; spermine biosynthetic process;	spermine synthase activity;
EAQLGEFHLR	MKGLAGFAR	Q6ZS17	Q9Y4F9		Protein FAM65A;	9.469	211	1223		cytoplasm; extracellular exosome;
ILFSNRAAAR	MKQDKKEMAINDCSKAIQLNPSYIR	Q99614			Tetratricopeptide repeat protein 1;	9.469	164	292		cytosol; peroxisomal membrane;	protein folding;	unfolded protein binding;
RNRELAILLG	MLDPAEKDEKGMPVTAR	P30041			Peroxiredoxin-6;	9.469	114	224	1-Cys peroxiredoxin;24 kDa protein;Acidic calcium-independent phospholipase A2;Antioxidant protein 2;Liver 2D page spot 40;Non-selenium glutathione peroxidase;Red blood cells page spot 12;	azurophil granule lumen; cytoplasm; cytosol; extracellular exosome; extracellular region; extracellular space; membrane;	cell redox homeostasis; cellular oxidant detoxification; glycerophospholipid catabolic process; hydrogen peroxide catabolic process; neutrophil degranulation; response to oxidative stress; response to reactive oxygen species;	cadherin binding; calcium-independent phospholipase A2 activity; glutathione peroxidase activity; peroxiredoxin activity; protein homodimerization activity; ubiquitin protein ligase binding;
CTRDGKPSAR	MLLLKGFGKDGFR	Q9NVS9			Pyridoxine-5'-phosphate oxidase;	9.469	94	261	Pyridoxamine-phosphate oxidase;	cytosol; extracellular exosome; nucleoplasm;	pyridoxal phosphate biosynthetic process; pyridoxine biosynthetic process; vitamin B6 metabolic process;	FMN binding; protein homodimerization activity; pyridoxal phosphate binding; pyridoxamine-phosphate oxidase activity;
PVLVVVDLGR	MLLTNTQDNSR	Q5THJ4			Vacuolar protein sorting-associated protein 13D;	9.469	737	4388		extracellular exosome;
PTGVAPTPVL	MNQPPQIAPKR	Q04637			Eukaryotic translation initiation factor 4 gamma 1;	9.469	163	1599	p220;	cytoplasm; cytosol; eukaryotic translation initiation factor 4F complex; membrane; nucleus; polysome;	behavioral fear response; cap-dependent translational initiation; cellular macromolecule biosynthetic process; developmental process; mitochondrion organization; negative regulation of autophagy; negative regulation of neuron death; negative regulation of peptidyl-threonine phosphorylation; nuclear-transcribed mRNA catabolic process, nonsense-mediated decay; nuclear-transcribed mRNA poly(A) tail …	ATP binding; cadherin binding; eukaryotic initiation factor 4E binding; mRNA binding; protein complex scaffold; RNA binding; translation factor activity, RNA binding; translation initiation factor activity; translation initiation factor binding;
TLSKTEFLSF	MNTELAAFTKNQKDPGVLDR	P31949			Protein S100-A11;	9.469	41	105	Calgizzarin;Metastatic lymph node gene 70 protein;Protein S100-C;S100 calcium-binding protein A11;	cell-cell adherens junction; cytoplasm; extracellular exosome; extracellular region; extracellular space; nucleus; ruffle; secretory granule lumen;	negative regulation of cell proliferation; negative regulation of DNA replication; neutrophil degranulation; signal transduction;	cadherin binding involved in cell-cell adhesion; calcium ion binding; calcium-dependent protein binding; protein homodimerization activity; S100 protein binding;
STMYPGIADR	MQKEIITLAPSTMKIKIIAPPER	Q562R1			Beta-actin-like protein 2;	9.469	312	376	Kappa-actin;	cytoplasm; cytoskeleton; extracellular exosome; extracellular space;		ATP binding;
NSGSLSVEEF	MSLPELQQNPLVQR	P63098			Calcineurin subunit B type 1;	9.469	42	170	Protein phosphatase 2B regulatory subunit 1;Protein phosphatase 3 regulatory subunit B alpha isoform 1;	calcineurin complex; cytosol; mitochondrion; nucleoplasm; sarcolemma;	branching involved in blood vessel morphogenesis; calcineurin-NFAT signaling cascade; epithelial to mesenchymal transition; Fc-epsilon receptor signaling pathway; heart development; lung epithelial cell differentiation; myelination in peripheral nervous system; NFAT protein import into nucleus; positive regulation of NFAT protein import into nucleus; positive regulation of protein insertion into …	calcium ion binding; calcium-dependent protein serine/threonine phosphatase activity; calmodulin binding; cyclosporin A binding; protein domain specific binding;
TLCTLEFAVQ	MTCQSCVDAVR	O14618			Copper chaperone for superoxide dismutase;	9.469	18	274	Superoxide dismutase copper chaperone;	cytoplasm; cytosol; nucleus;	intracellular copper ion transport; positive regulation of oxidoreductase activity; removal of superoxide radicals; response to reactive oxygen species; superoxide metabolic process;	cadherin binding; copper ion binding; protein disulfide oxidoreductase activity; superoxide dismutase activity; zinc ion binding;
SHLRKVFDKY	MTISGFQIEETIDR	P08758			Annexin A5;	9.469	212	320	Anchorin CII;Annexin V;Annexin-5;Calphobindin I;Endonexin II;Lipocortin V;Placental anticoagulant protein 4;Placental anticoagulant protein I;Thromboplastin inhibitor;Vascular anticoagulant-alpha;	cytoplasm; cytosol; endothelial microparticle; external side of plasma membrane; extracellular exosome; extracellular region; focal adhesion; intracellular; membrane;	blood coagulation; negative regulation of apoptotic process; negative regulation of coagulation; platelet degranulation; response to organic substance; signal transduction;	calcium ion binding; calcium-dependent phospholipid binding; phospholipase inhibitor activity; phospholipid binding;
IVGRPRHQGV	MVGMGQKDSYVGDEAQSKR	P63261	P68032	P62736	Actin, cytoplasmic 2;	9.469	42	375	Gamma-actin;	blood microparticle; cytoskeleton; cytosol; dense body; extracellular exosome; extracellular matrix; extracellular space; filamentous actin; focal adhesion; membrane; myelin sheath; myofibril; nucleus; plasma membrane;	cell junction assembly; ephrin receptor signaling pathway; Fc-gamma receptor signaling pathway involved in phagocytosis; membrane organization; movement of cell or subcellular component; platelet aggregation; response to calcium ion; response to mechanical stimulus; retina homeostasis; sarcomere organization; vascular endothelial growth factor receptor signaling pathway;	ATP binding; identical protein binding; structural constituent of cytoskeleton; ubiquitin protein ligase binding;
GRLSKEEIER	MVQEAEKYKAEDEVQR	P0DMV9	P0DMV8		Heat shock 70 kDa protein 1B {ECO:0000312|HGNC:HGNC:5233};	9.469	516	641	Heat shock 70 kDa protein 2;	aggresome; blood microparticle; centriole; centrosome; cytoplasm; cytosol; endoplasmic reticulum; extracellular exosome; extracellular region; ficolin-1-rich granule lumen; focal adhesion; inclusion body; intracellular ribonucleoprotein complex; mitochondrion; nuclear speck; nucleoplasm; nucleus; perinuclear region of cytoplasm; vesicle;	ATP metabolic process; cellular heat acclimation; cellular response to heat; cellular response to oxidative stress; mRNA catabolic process; negative regulation of apoptotic process; negative regulation of cell death; negative regulation of cell growth; negative regulation of cell proliferation; negative regulation of extrinsic apoptotic signaling pathway in absence of ligand; negative regulation …	ATP binding; ATPase activity; ATPase activity, coupled; C3HC4-type RING finger domain binding; enzyme binding; G-protein coupled receptor binding; heat shock protein binding; histone deacetylase binding; protein binding involved in protein folding; protein N-terminus binding; receptor binding; RNA binding; ubiquitin protein ligase binding; unfolded protein binding; virus receptor activity;
IPPPYDKKKR	MVVPAALKVVR	Q6NVV1	P40429		Putative 60S ribosomal protein L13a protein RPL13AP3;	9.469	116	203	60S ribosomal protein L13a pseudogene 3;	cytosolic large ribosomal subunit; extracellular exosome; nucleus;	translation;	mRNA binding; structural constituent of ribosome;
HEDDNPFAEY	MWMENEEEFNR	Q9BPZ3			Polyadenylate-binding protein-interacting protein 2;	9.469	33	127		cytoplasm;	memory; negative regulation of translational initiation; regulation of long-term synaptic potentiation; spermatogenesis;	mRNA binding; translation repressor activity;
ITSDTSGDFR	NALLSLAKGDR	P04083			Annexin A1;	9.469	176	346	Annexin I;Annexin-1;Calpactin II;Calpactin-2;Chromobindin-9;Lipocortin I {ECO:0000303|PubMed:1832554};Phospholipase A2 inhibitory protein;p35;	apical plasma membrane; basolateral plasma membrane; cell surface; cell-cell adherens junction; cornified envelope; cytoplasm; cytoplasmic vesicle membrane; cytosol; early endosome membrane; endosome; extracellular exosome; extracellular region; extracellular space; extrinsic component of endosome membrane; extrinsic component of external side of plasma membrane; extrinsic component of membrane; …	actin cytoskeleton reorganization; adaptive immune response; alpha-beta T cell differentiation; arachidonic acid secretion; cell surface receptor signaling pathway; cellular response to glucocorticoid stimulus; cellular response to hydrogen peroxide; DNA duplex unwinding; DNA rewinding; endocrine pancreas development; estrous cycle; G-protein coupled receptor signaling pathway, coupled to cyclic …	annealing helicase activity; cadherin binding involved in cell-cell adhesion; calcium ion binding; calcium-dependent phospholipid binding; calcium-dependent protein binding; double-stranded DNA-dependent ATPase activity; helicase activity; phospholipase A2 inhibitor activity; phospholipid binding; protein binding, bridging; protein homodimerization activity; receptor binding; single-stranded DNA …
TAAHTANFLL	NASGSTSTPAPSR	P53396			ATP-citrate synthase;	9.469	438	1101	ATP-citrate (pro-S-)-lyase;Citrate cleavage enzyme;	azurophil granule lumen; citrate lyase complex; cytosol; extracellular exosome; extracellular region; ficolin-1-rich granule lumen; membrane; nucleoplasm; plasma membrane;	acetyl-CoA biosynthetic process; cholesterol biosynthetic process; citrate metabolic process; fatty acid biosynthetic process; lipid biosynthetic process; long-chain fatty-acyl-CoA biosynthetic process; neutrophil degranulation; oxaloacetate metabolic process; positive regulation of cellular metabolic process;	ATP binding; ATP citrate synthase activity; cofactor binding; metal ion binding;
GPEKLNIDTR	NCKILLTEPPMNPTKNR	P61160			Actin-related protein 2;	9.469	102	394	Actin-like protein 2;	actin cap; actin cytoskeleton; Arp2/3 protein complex; azurophil granule lumen; cytoplasm; cytosol; extracellular exosome; extracellular region; ficolin-1-rich granule lumen; focal adhesion; invadopodium; lamellipodium; membrane; podosome core; postsynaptic density;	Arp2/3 complex-mediated actin nucleation; associative learning; asymmetric cell division; cellular response to trichostatin A; cilium assembly; cytosolic transport; ephrin receptor signaling pathway; establishment or maintenance of cell polarity; Fc-gamma receptor signaling pathway involved in phagocytosis; meiotic chromosome movement towards spindle pole; meiotic cytokinesis; membrane organizati…	actin binding; ATP binding; structural constituent of cytoskeleton;
VRALVLELCC	NDESGEDVEVPYVR	P22314			Ubiquitin-like modifier-activating enzyme 1;	9.469	1039	1058	Protein A1S9;Ubiquitin-activating enzyme E1;	cytoplasm; cytosol; extracellular exosome; mitochondrion; nucleoplasm; nucleus;	cellular response to DNA damage stimulus; protein ubiquitination;	ATP binding; RNA binding; ubiquitin activating enzyme activity;
KMTLKEFAIM	NEDQDDEEFLQQYR	Q13371			Phosducin-like protein;	9.469	126	301		cytoplasm; cytosol;	heterotrimeric G-protein complex assembly; negative regulation of protein refolding; protein folding; queuosine biosynthetic process; regulation of G-protein coupled receptor protein signaling pathway; signal transduction; visual perception;	protein complex binding; signal transducer activity, downstream of receptor;
AQHGRPPRPR	NEEDAAELVALAQAVNAR	P22314			Ubiquitin-like modifier-activating enzyme 1;	9.469	349	1058	Protein A1S9;Ubiquitin-activating enzyme E1;	cytoplasm; cytosol; extracellular exosome; mitochondrion; nucleoplasm; nucleus;	cellular response to DNA damage stimulus; protein ubiquitination;	ATP binding; RNA binding; ubiquitin activating enzyme activity;
NYQNSESGEK	NEGSESAPEGQAQQR	P67809			Nuclease-sensitive element-binding protein 1;	9.469	169	324	CCAAT-binding transcription factor I subunit A;DNA-binding protein B;Enhancer factor I subunit A;Y-box transcription factor;Y-box-binding protein 1;	CRD-mediated mRNA stability complex; cytoplasm; cytoplasmic stress granule; cytosol; extracellular exosome; histone pre-mRNA 3'end processing complex; intracellular membrane-bounded organelle; intracellular ribonucleoprotein complex; nuclear membrane; nucleoplasm; nucleus; U12-type spliceosomal complex;	CRD-mediated mRNA stabilization; in utero embryonic development; mRNA splicing, via spliceosome; negative regulation of striated muscle cell differentiation; negative regulation of transcription from RNA polymerase II promoter; positive regulation of cell division; positive regulation of transcription from RNA polymerase II promoter; protein localization to cytoplasmic stress granule; regulation …	chromatin binding; DNA binding; double-stranded DNA binding; GTPase binding; RNA binding; RNA polymerase II core promoter proximal region sequence-specific DNA binding; single-stranded DNA binding; transcription factor activity, sequence-specific DNA binding; transcriptional activator activity, RNA polymerase II core promoter proximal region sequence-specific binding;
VKAPAMFNIR	NIGKTLVTR	P61247			40S ribosomal protein S3a {ECO:0000255|HAMAP-Rule:MF_03122};	9.469	41	264	Small ribosomal subunit protein eS1 {ECO:0000303|PubMed:24524803};v-fos transformation effector protein;	cytoplasm; cytosol; cytosolic small ribosomal subunit; endoplasmic reticulum; extracellular exosome; extracellular matrix; focal adhesion; intracellular ribonucleoprotein complex; nucleolus; nucleoplasm; nucleus;	cell differentiation; negative regulation of apoptotic process; nuclear-transcribed mRNA catabolic process, nonsense-mediated decay; rRNA processing; SRP-dependent cotranslational protein targeting to membrane; translation; translational initiation; viral transcription;	mRNA 5'-UTR binding; RNA binding; structural constituent of ribosome;
KTPEEIRKTF	NIKNDFTEEEEAQVR	P63208			S-phase kinase-associated protein 1;	9.469	138	163	Cyclin-A/CDK2-associated protein p19;Organ of Corti protein 2;Organ of Corti protein II;RNA polymerase II elongation factor-like protein;SIII;Transcription elongation factor B polypeptide 1-like;p19skp1;	Cul7-RING ubiquitin ligase complex; cytoplasm; cytosol; extracellular exosome; nucleoplasm; nucleus; SCF ubiquitin ligase complex;	Fc-epsilon receptor signaling pathway; G2/M transition of mitotic cell cycle; histone H2A monoubiquitination; maintenance of protein location in nucleus; negative regulation of G2/M transition of mitotic cell cycle; NIK/NF-kappaB signaling; positive regulation of ubiquitin-protein ligase activity involved in regulation of mitotic cell cycle transition; proteasome-mediated ubiquitin-dependent prot…	beta-catenin binding; cullin family protein binding; protein domain specific binding; ubiquitin-protein transferase activity;
GIIYPPPEVR	NIVDKTASFVAR	Q15459			Splicing factor 3A subunit 1;	9.469	49	793	SF3a120;Spliceosome-associated protein 114;	catalytic step 2 spliceosome; nuclear speck; nucleoplasm; spliceosomal complex; U2 snRNP; U2-type prespliceosome; U2-type spliceosomal complex;	mRNA 3'-splice site recognition; mRNA processing; mRNA splicing, via spliceosome; regulation of alternative mRNA splicing, via spliceosome;	RNA binding;
ANIHKIYHTL	NKLNLTEDIGQDDHQTGSLR	Q92564			DCN1-like protein 4;	9.469	28	292	DCUN1 domain-containing protein 4;Defective in cullin neddylation protein 1-like protein 4;	nucleus; ubiquitin ligase complex;	positive regulation of ubiquitin-protein transferase activity; protein neddylation;	cullin family protein binding; ubiquitin conjugating enzyme binding; ubiquitin-like protein binding;
VAPSLVAPAL	NKPKKPLTSSSAAPQRPISTQR	Q15691			Microtubule-associated protein RP/EB family member 1;	9.469	145	268	APC-binding protein EB1;End-binding protein 1;	cell projection membrane; centrosome; cortical microtubule cytoskeleton; cytoplasmic microtubule; cytosol; Golgi apparatus; microtubule; microtubule plus-end;	cell division; cell proliferation; ciliary basal body docking; G2/M transition of mitotic cell cycle; mitotic nuclear division; negative regulation of microtubule binding; negative regulation of microtubule polymerization; positive regulation of cell migration; positive regulation of microtubule plus-end binding; protein localization to microtubule; sister chromatid cohesion;	cadherin binding; identical protein binding; microtubule plus-end binding; protein C-terminus binding; RNA binding;
TYRELIEQLR	NKPSDLGTKLQDPR	P31948			Stress-induced-phosphoprotein 1;	9.469	159	543	Hsc70/Hsp90-organizing protein;Renal carcinoma antigen NY-REN-11;Transformation-sensitive protein IEF SSP 3521;	Golgi apparatus; myelin sheath; nucleus; protein complex;	response to stress;	chaperone binding; Hsp70 protein binding; protein C-terminus binding; RNA binding;
VKELEVLLMC	NKSYCAEIAHNVSSKNR	P62910			60S ribosomal protein L32;	9.469	90	135	Large ribosomal subunit protein eL32 {ECO:0000303|PubMed:24524803};	cytosol; cytosolic large ribosomal subunit; membrane;	cellular response to dexamethasone stimulus; liver regeneration; nuclear-transcribed mRNA catabolic process, nonsense-mediated decay; rRNA processing; SRP-dependent cotranslational protein targeting to membrane; translation; translational initiation; viral transcription;	RNA binding; structural constituent of ribosome;
SLEIDLDSMR	NLKASLENSLR	P05783	HIT000015463		Keratin, type I cytoskeletal 18;	9.469	313	430	Cell proliferation-inducing gene 46 protein;Cytokeratin-18;Keratin-18;	cell periphery; cell-cell adherens junction; centriolar satellite; cytoplasm; cytosol; extracellular exosome; intermediate filament; keratin filament; microtubule organizing center; nucleolus; perinuclear region of cytoplasm;	anatomical structure morphogenesis; cell cycle; cornification; extrinsic apoptotic signaling pathway; Golgi to plasma membrane CFTR protein transport; hepatocyte apoptotic process; intermediate filament cytoskeleton organization; keratinization; negative regulation of apoptotic process; tumor necrosis factor-mediated signaling pathway; viral process;	cadherin binding involved in cell-cell adhesion; RNA binding; scaffold protein binding; structural molecule activity;
ELRMISSTFL	NLPFQGIR	Q9BXT4			Tudor domain-containing protein 1;	9.469	818	1180	Cancer/testis antigen 41.1;	chromatoid body; cytoplasm; P granule; pi-body;	DNA methylation involved in gamete generation; gene silencing by RNA; germ cell development; meiotic cell cycle; multicellular organism development; piRNA metabolic process; spermatogenesis;	metal ion binding;
GPRLAAMLNF	NLQQLCGPKCR	O95155			Ubiquitin conjugation factor E4 B {ECO:0000305};	9.469	1122	1302	Homozygously deleted in neuroblastoma 1 {ECO:0000312|EMBL:BAB40446.1};RING-type E3 ubiquitin transferase E4 B;Ubiquitin fusion degradation protein 2 {ECO:0000312|EMBL:AAD02233.1};	cytoplasm; nucleus; ubiquitin ligase complex;	granzyme-mediated apoptotic signaling pathway; neuron projection development; proteasome-mediated ubiquitin-dependent protein catabolic process; protein autoubiquitination; protein monoubiquitination; protein polyubiquitination; protein ubiquitination involved in ubiquitin-dependent protein catabolic process; response to UV; ubiquitin-dependent ERAD pathway; ventricular trabecula myocardium morph…	ATP binding; ATPase binding; enzyme binding; ubiquitin-ubiquitin ligase activity;
KQESTVMVLR	NMVDPKDIDDDLEGEVTEECGKFGAVNR	Q9UHX1			Poly(U)-binding-splicing factor PUF60;	9.469	466	559	60 kDa poly(U)-binding-splicing factor;FUSE-binding protein-interacting repressor;Ro-binding protein 1;Siah-binding protein 1;	cell junction; intracellular ribonucleoprotein complex; nucleoplasm;	apoptotic process; mRNA splicing, via spliceosome; regulation of transcription, DNA-templated; transcription, DNA-templated;	cadherin binding; DNA binding; identical protein binding; RNA binding;
VENMVDQLLR	NNDLCYWVPELVR	P41252			Isoleucine--tRNA ligase, cytoplasmic;	9.469	427	1262	Isoleucyl-tRNA synthetase;	aminoacyl-tRNA synthetase multienzyme complex; cytoplasm; cytosol; extracellular exosome; membrane;	isoleucyl-tRNA aminoacylation; osteoblast differentiation; tRNA aminoacylation for protein translation;	aminoacyl-tRNA editing activity; ATP binding; GTPase binding; isoleucine-tRNA ligase activity; tRNA binding;
RPFYTMPDPR	NPKQSNSYDMFMR	P14868			Aspartate--tRNA ligase, cytoplasmic;	9.469	407	501	Aspartyl-tRNA synthetase;Cell proliferation-inducing gene 40 protein;	aminoacyl-tRNA synthetase multienzyme complex; cytoplasm; cytosol; extracellular exosome; membrane;	aspartyl-tRNA aminoacylation; protein complex assembly; translation; tRNA aminoacylation for protein translation;	aminoacylase activity; aspartate-tRNA ligase activity; ATP binding; RNA binding;
SSLKRLDLTN	NRIGCLNADIFR	Q8IWK6			Adhesion G protein-coupled receptor A3 {ECO:0000303|PubMed:25713288};	9.469	137	1321	G-protein coupled receptor 125;	external side of plasma membrane; integral component of membrane;	cell surface receptor signaling pathway; G-protein coupled receptor signaling pathway;	G-protein coupled receptor activity;
LKGLQEFLDR	NSQFAGGPLGNPNTTAKVQQR	O75694			Nuclear pore complex protein Nup155;	9.469	722	1391	155 kDa nucleoporin;Nucleoporin Nup155;	membrane; nuclear envelope; nuclear membrane; nuclear pore inner ring;	atrial cardiac muscle cell action potential; gene silencing by RNA; intracellular transport of virus; mitotic nuclear envelope disassembly; mRNA export from nucleus; nuclear envelope organization; protein import into nucleus; protein sumoylation; protein targeting to nuclear inner membrane; regulation of cellular response to heat; regulation of glucose transport; RNA export from nucleus; transcri…	structural constituent of nuclear pore; transporter activity;
ALGIPLPELR	NSVTGGTAAFEPSVDYCVVKIPR	P27708			CAD protein;	9.469	718	2225		cell projection; cytosol; extracellular exosome; membrane; neuronal cell body; nuclear matrix; nucleoplasm; nucleus; protein complex; terminal bouton;	'de novo' pyrimidine nucleobase biosynthetic process; 'de novo' UMP biosynthetic process; animal organ regeneration; cellular response to drug; cellular response to epidermal growth factor stimulus; citrulline biosynthetic process; drug metabolic process; female pregnancy; glutamine metabolic process; heart development; lactation; liver development; peptidyl-threonine phosphorylation; protein aut…	aspartate binding; aspartate carbamoyltransferase activity; ATP binding; carbamoyl-phosphate synthase (glutamine-hydrolyzing) activity; dihydroorotase activity; enzyme binding; identical protein binding; protein kinase activity; zinc ion binding;
GMNQFKPIFL	NTIDPSHPMAKLSR	P49588			Alanine--tRNA ligase, cytoplasmic {ECO:0000255|HAMAP-Rule:MF_03133};	9.469	53	968	Alanyl-tRNA synthetase {ECO:0000255|HAMAP-Rule:MF_03133};Renal carcinoma antigen NY-REN-42;	cytoplasm; cytosol; extracellular exosome; membrane;	alanyl-tRNA aminoacylation; cerebellar Purkinje cell layer development; negative regulation of neuron apoptotic process; neuromuscular process controlling balance; tRNA aminoacylation for protein translation; tRNA modification; tRNA processing;	alanine-tRNA ligase activity; amino acid binding; aminoacyl-tRNA editing activity; ATP binding; metal ion binding; tRNA binding;
WNEPDHHDFD	NVSMTMQGFLNYYDACSEGLR	P35475			Alpha-L-iduronidase;	9.469	188	653		coated vesicle; extracellular exosome; lysosomal lumen;	chondroitin sulfate catabolic process; dermatan sulfate catabolic process; disaccharide metabolic process; glycosaminoglycan catabolic process;	L-iduronidase activity; receptor binding;
IVAASNLRAE	NYDIPSADR	P22314			Ubiquitin-like modifier-activating enzyme 1;	9.469	870	1058	Protein A1S9;Ubiquitin-activating enzyme E1;	cytoplasm; cytosol; extracellular exosome; mitochondrion; nucleoplasm; nucleus;	cellular response to DNA damage stimulus; protein ubiquitination;	ATP binding; RNA binding; ubiquitin activating enzyme activity;
PLESDAVECL	NYQHYKGSDFDCELR	P61978			Heterogeneous nuclear ribonucleoprotein K;	9.469	132	463	Transformation up-regulated nuclear protein;	catalytic step 2 spliceosome; cell projection; cytoplasm; extracellular exosome; extracellular matrix; focal adhesion; membrane; nuclear chromatin; nucleoplasm; nucleus; podosome;	gene expression; mRNA splicing, via spliceosome; negative regulation of apoptotic process; negative regulation of mRNA splicing, via spliceosome; positive regulation of low-density lipoprotein particle receptor biosynthetic process; positive regulation of receptor-mediated endocytosis; positive regulation of transcription from RNA polymerase II promoter; regulation of intrinsic apoptotic signalin…	cadherin binding; RNA binding; RNA polymerase II core promoter proximal region sequence-specific DNA binding; single-stranded DNA binding; transcriptional activator activity, RNA polymerase II core promoter proximal region sequence-specific binding;
AKSVPADLSR	PKSTSTSSMKKTTTLSGTAPAAGVVPSR	P27816			Microtubule-associated protein 4;	9.469	859	1152		axoneme; cytoplasm; extracellular exosome; microtubule; microtubule associated complex; mitotic spindle; neuron projection; postsynaptic density;	cell division; establishment of spindle orientation; microtubule sliding; mitotic spindle organization; negative regulation of non-motile cilium assembly; neuron projection development;	microtubule binding; RNA binding; structural molecule activity;
SKPPAERSKQ	PPPPTAPAAPPAPAPLEKPIVLMKPR	Q9H0W8			Protein SMG9 {ECO:0000305};	9.469	77	520	Protein SMG-9 {ECO:0000303|PubMed:19417104};	cytosol; intracellular;	brain development; eye development; heart development; nuclear-transcribed mRNA catabolic process, nonsense-mediated decay;	identical protein binding;
GVSSLLLHPE	PVPGPEKENVR	O75152			Zinc finger CCCH domain-containing protein 11A;	9.469	246	810		nucleoplasm;	mRNA 3'-end processing; mRNA export from nucleus; poly(A)+ mRNA export from nucleus; RNA export from nucleus; termination of RNA polymerase II transcription;	metal ion binding; RNA binding;
LQELKDLNQR	QAHVDFEAMLR	Q9BW85			Coiled-coil domain-containing protein 94;	9.469	162	323
KLMLAQDEER	QASLADCLNHAVGFASR	O43592			Exportin-T;	9.469	642	962	Exportin(tRNA);tRNA exportin;	cytoplasm; cytosol; nuclear matrix; nucleoplasm;	tRNA export from nucleus; tRNA re-export from nucleus;	nucleobase-containing compound transmembrane transporter activity; Ran GTPase binding; tRNA binding;
DFLPTRLQAQ	QDAVNIVCHSKTR	P55036			26S proteasome non-ATPase regulatory subunit 4;	9.469	28	377	26S proteasome regulatory subunit RPN10;26S proteasome regulatory subunit S5A;Antisecretory factor 1;Multiubiquitin chain-binding protein;	cytosol; nucleoplasm; nucleus; proteasome accessory complex; proteasome complex; proteasome regulatory particle, base subcomplex;	anaphase-promoting complex-dependent catabolic process; antigen processing and presentation of exogenous peptide antigen via MHC class I, TAP-dependent; Fc-epsilon receptor signaling pathway; MAPK cascade; negative regulation of canonical Wnt signaling pathway; negative regulation of G2/M transition of mitotic cell cycle; negative regulation of ubiquitin-protein ligase activity involved in mitoti…	identical protein binding; polyubiquitin binding; RNA binding;
SYVFLRVRER	QENILVEPDTDEQR	Q9BRT9			DNA replication complex GINS protein SLD5;	9.469	177	223	GINS complex subunit 4;	cytoplasm; GINS complex; nucleoplasm; replication fork protection complex;	DNA duplex unwinding; DNA replication initiation; DNA strand elongation involved in DNA replication; double-strand break repair via break-induced replication; inner cell mass cell proliferation;
VPMYTDSEPR	QEVPMYTDSEPR	Q96EK7			Constitutive coactivator of peroxisome proliferator-activated receptor gamma;	9.469	433	910	PPARG constitutive coactivator 1;Protein FAM120B;	nucleus;	fat cell differentiation; peroxisome proliferator activated receptor signaling pathway; regulation of transcription, DNA-templated; transcription, DNA-templated;
RLDFDYKKKR	QGKIPDEELR	Q99961	Q99962		Endophilin-A2;	9.469	173	352	EEN fusion partner of MLL;Endophilin-2;Extra eleven-nineteen leukemia fusion gene protein;SH3 domain protein 2B;SH3 domain-containing GRB2-like protein 1;	cell junction; cell projection; cytoplasm; early endosome membrane; podosome; synapse;	central nervous system development; signal transduction; synaptic vesicle uncoating;	cadherin binding; GTPase binding; identical protein binding; lipid binding; phosphatase binding;
PGDAGEQAIR	QILDEAGKVGELCAGKER	P18206			Vinculin;	9.469	299	1134	Metavinculin;	adherens junction; brush border; cell; cell-cell adherens junction; cell-cell junction; cell-substrate junction; costamere; cytoskeleton; cytosol; extracellular exosome; extracellular region; extracellular vesicle; fascia adherens; ficolin-1-rich granule lumen; focal adhesion; inner dense plaque of desmosome; membrane raft; outer dense plaque of desmosome; plasma membrane; podosome; protein compl…	adherens junction assembly; apical junction assembly; axon extension; cell adhesion; cell-matrix adhesion; epithelial cell-cell adhesion; lamellipodium assembly; morphogenesis of an epithelium; movement of cell or subcellular component; muscle contraction; negative regulation of cell migration; neutrophil degranulation; platelet aggregation; platelet degranulation; protein localization to cell su…	actin binding; alpha-catenin binding; beta-catenin binding; cadherin binding; dystroglycan binding; structural molecule activity; ubiquitin protein ligase binding;
KARAEAEDAR	QKAKDDDDSDIPTAQR	O60271			C-Jun-amino-terminal kinase-interacting protein 4;	9.469	483	1321	Cancer/testis antigen 89;Human lung cancer oncogene 6 protein;JNK-associated leucine-zipper protein;Mitogen-activated protein kinase 8-interacting protein 4;Proliferation-inducing protein 6;Protein highly expressed in testis;Sperm surface protein;Sperm-associated antigen 9;Sperm-specific protein;Sunday driver 1;	acrosomal vesicle; cytoplasm; cytosol; extracellular exosome; integral component of membrane; microtubule organizing center; perinuclear region of cytoplasm;	activation of JUN kinase activity; negative regulation of protein homodimerization activity; positive regulation of cell migration; positive regulation of muscle cell differentiation; positive regulation of neuron differentiation; protein homooligomerization; retrograde transport, endosome to Golgi; spermatogenesis; striated muscle cell differentiation;	JUN kinase binding; kinesin binding; MAP-kinase scaffold activity; mitogen-activated protein kinase p38 binding; receptor signaling complex scaffold activity;
QKRLQEALER	QKEFDPTITDASLSLPSR	Q05682			Caldesmon;	9.469	116	793		actin cap; actin cytoskeleton; cytoskeleton; cytosol; intracellular membrane-bounded organelle; myofibril; plasma membrane;	movement of cell or subcellular component; muscle contraction;	actin binding; cadherin binding; calmodulin binding; myosin binding; tropomyosin binding;
GISLNPEQWS	QLKEQISDIDDAVR	P53999			Activated RNA polymerase II transcriptional coactivator p15;	9.469	110	127	Positive cofactor 4;SUB1 homolog;p14;	extracellular exosome; nucleolus; nucleus; transcription factor complex;	positive regulation of transcription initiation from RNA polymerase II promoter; regulation of transcription from RNA polymerase II promoter; SMAD protein signal transduction;	RNA binding; single-stranded DNA binding; transcription coactivator activity; transcriptional activator activity, RNA polymerase II distal enhancer sequence-specific binding;
M	QLTHQLDLFPECR	Q9Y3C4			EKC/KEOPS complex subunit TPRKB;	9.469	0	175	PRPK-binding protein;TP53RK-binding protein;	cytosol; nucleus;	tRNA processing;	protein kinase binding;
PEKRTDKIFR	QMDTNNDGKLSLEEFIR	P84074	P37235		Neuron-specific calcium-binding protein hippocalcin;	9.469	153	193	Calcium-binding protein BDR-2;	axon; dendrite cytoplasm; dendrite membrane; dendritic spine head; neuronal cell body membrane; perikaryon;	activation of phospholipase D activity; brain development; calcium-mediated signaling; cellular response to electrical stimulus; cellular response to monosodium glutamate; inner ear development; negative regulation of guanylate cyclase activity; positive regulation of adenylate cyclase activity; positive regulation of protein targeting to membrane; response to Aroclor 1254; response to ketamine; …	actin binding; calcium ion binding; kinase binding;
ALPESPRLTL	QPKPVVGHFSAR	Q86Y91			Kinesin-like protein KIF18B;	9.469	505	864		astral microtubule; cytoplasm; cytosol; kinesin complex; microtubule end; microtubule plus-end; nuclear body; nucleus;	cell division; microtubule depolymerization; microtubule-based movement; mitotic cell cycle; mitotic sister chromatid segregation; regulation of cell division;	ATP binding; ATPase activity; kinesin binding; microtubule binding; microtubule motor activity; motor activity;
KIRKLVAVKR	QQEPLGEDCPSELR	Q8NB16			Mixed lineage kinase domain-like protein;	9.469	427	471		cytoplasm; cytosol; plasma membrane;	intracellular signal transduction; necroptotic process; protein homotrimerization;	ATP binding; protein complex binding; protein kinase binding; signal transducer activity;
SVKALADYIR	QQKSDPIQEIR	Q9BS26			Endoplasmic reticulum resident protein 44;	9.469	136	406	Thioredoxin domain-containing protein 4;	cell surface; endoplasmic reticulum lumen; endoplasmic reticulum membrane; endoplasmic reticulum-Golgi intermediate compartment; extracellular exosome; extracellular region; specific granule lumen;	cell redox homeostasis; glycoprotein metabolic process; neutrophil degranulation; protein folding; response to endoplasmic reticulum stress; response to unfolded protein;	protein disulfide isomerase activity;
QMRPQLPAFL	QQMQNPDTLSAMSNPR	Q9UMX0	Q9UHD9		Ubiquilin-1;	9.469	433	624	Protein linking IAP with cytoskeleton 1;	aggresome; autophagosome; cytoplasm; cytoplasmic vesicle; cytosol; endoplasmic reticulum; nucleoplasm; perinuclear region of cytoplasm; plasma membrane; proteasome complex; protein complex;	aggrephagy; autophagosome assembly; autophagosome maturation; cellular response to hypoxia; macroautophagy; negative regulation of store-operated calcium channel activity; negative regulation of toll-like receptor 3 signaling pathway; positive regulation of ER-associated ubiquitin-dependent protein catabolic process; positive regulation of protein ubiquitination; regulation of oxidative stress-in…	identical protein binding; kinase binding; polyubiquitin binding;
EMGSGQLAPR	QQQQQTELDMVPGR	P27540			Aryl hydrocarbon receptor nuclear translocator;	9.469	501	789	Class E basic helix-loop-helix protein 2;Dioxin receptor, nuclear translocator;Hypoxia-inducible factor 1-beta;	cytoplasm; nuclear body; nucleoplasm; nucleus; RNA polymerase II transcription factor complex;	cell differentiation; embryonic placenta development; mRNA transcription from RNA polymerase II promoter; positive regulation of endothelial cell proliferation; positive regulation of erythrocyte differentiation; positive regulation of glycolytic process; positive regulation of hormone biosynthetic process; positive regulation of protein sumoylation; positive regulation of transcription from RNA …	aryl hydrocarbon receptor activity; aryl hydrocarbon receptor binding; enhancer binding; protein heterodimerization activity; transcription coactivator activity; transcription factor activity, sequence-specific DNA binding; transcription factor binding;
RRLEAAYLDL	QRILENEKDLEEAEEYKEAR	O75347			Tubulin-specific chaperone A;	9.469	77	108	TCP1-chaperonin cofactor A;Tubulin-folding cofactor A;	cytoplasm; extracellular exosome; microtubule; microtubule cytoskeleton; nucleolus;	post-chaperonin tubulin folding pathway; protein folding; tubulin complex assembly;	beta-tubulin binding; chaperone binding; RNA binding;
AKLVLLKKLR	QSQIQKEATAQKPTGSVGSTVTTPPPLVR	Q86YP4			Transcriptional repressor p66-alpha;	9.469	165	633	GATA zinc finger domain-containing protein 2A;	nuclear speck; nucleoplasm; nucleus; NuRD complex;	DNA methylation; negative regulation of transcription, DNA-templated; transcription, DNA-templated;	protein binding, bridging; sequence-specific DNA binding; transcription factor activity, sequence-specific DNA binding; zinc ion binding;
ISAASITPLL	QTQPQPLLQQPQQKAGLLQPPVR	Q8IX12			Cell division cycle and apoptosis regulator protein 1;	9.469	260	1150	Cell cycle and apoptosis regulatory protein 1;Death inducer with SAP domain;	nucleoplasm; perinuclear region of cytoplasm;	apoptotic process; cell cycle; mRNA splicing, via spliceosome; positive regulation of cell migration; positive regulation of cell proliferation; regulation of transcription, DNA-templated; transcription, DNA-templated;	core promoter binding; ligand-dependent nuclear receptor transcription coactivator activity; RNA binding; transcription coactivator activity; transcription corepressor activity;
GKWPFWLSPR	QVMVVPVGPTCDEYAQKVR	P26639			Threonine--tRNA ligase, cytoplasmic;	9.469	618	723	Threonyl-tRNA synthetase;	actin cytoskeleton; cytoplasm; cytosol; extracellular exosome;	threonyl-tRNA aminoacylation; translation; tRNA aminoacylation for protein translation;	ATP binding; protein homodimerization activity; threonine-tRNA ligase activity;
EIPALLDGRL	QVVDQPLPVR	P49327			Fatty acid synthase;	9.469	373	2511		cytosol; extracellular exosome; glycogen granule; Golgi apparatus; melanosome; membrane; mitochondrion; plasma membrane;	acetyl-CoA metabolic process; cellular response to interleukin-4; fatty acid biosynthetic process; fatty acid metabolic process; long-chain fatty-acyl-CoA biosynthetic process; mammary gland development; osteoblast differentiation; pantothenate metabolic process; positive regulation of cellular metabolic process;	3-hydroxyoctanoyl-[acyl-carrier-protein] dehydratase activity; 3-hydroxypalmitoyl-[acyl-carrier-protein] dehydratase activity; 3-oxo-pimeloyl-[acp] methyl ester reductase activity; 3-oxoacyl-[acyl-carrier-protein] reductase (NADPH) activity; 3-oxoacyl-[acyl-carrier-protein] synthase activity; [acyl-carrier-protein] S-acetyltransferase activity; [acyl-carrier-protein] S-malonyltransferase activity…
TVLYDVQELR	RAMKGAGTDEGCLIEILASR	P09525			Annexin A4;	9.469	95	319	35-beta calcimedin;Annexin IV;Annexin-4;Carbohydrate-binding protein p33/p41;Chromobindin-4;Endonexin I;Lipocortin IV;P32.5;PP4-X;Placental anticoagulant protein II;Protein II;	cell surface; cytoplasm; extracellular exosome; nuclear membrane; nucleus; perinuclear region of cytoplasm; plasma membrane; vesicle membrane;	epithelial cell differentiation; negative regulation of apoptotic process; negative regulation of interleukin-8 secretion; negative regulation of NF-kappaB transcription factor activity; Notch signaling pathway; regulation of transcription from RNA polymerase II promoter; signal transduction;	calcium ion binding; calcium-dependent phospholipid binding; calcium-dependent protein binding; identical protein binding; NF-kappaB binding; phospholipase inhibitor activity;
VSSSLPDICY	RCGESGHLAKDCDLQEDACYNCGR	P62633			Cellular nucleic acid-binding protein;	9.469	54	177	Zinc finger protein 9;	cytosol; endoplasmic reticulum; nucleus;	cholesterol biosynthetic process; negative regulation of transcription from RNA polymerase II promoter; positive regulation of cell proliferation; positive regulation of transcription from RNA polymerase II promoter; positive regulation of transcription, DNA-templated; regulation of transcription, DNA-templated; transcription, DNA-templated;	RNA binding; RNA polymerase II regulatory region sequence-specific DNA binding; single-stranded DNA binding; single-stranded RNA binding; transcription factor activity, sequence-specific DNA binding; transcriptional repressor activity, RNA polymerase II transcription regulatory region sequence-specific binding; zinc ion binding;
MALDPELLLL	RDDGEEEFAGAKLEDSEVR	Q8N163			Cell cycle and apoptosis regulator protein 2;	9.469	654	923	Cell division cycle and apoptosis regulator protein 2;DBIRD complex subunit KIAA1967;Deleted in breast cancer gene 1 protein;NET35;p30 DBC;	cytoplasm; DBIRD complex; mitochondrial matrix; nuclear chromatin; nucleoplasm; nucleus;	cell cycle; cellular response to DNA damage stimulus; mitochondrial fragmentation involved in apoptotic process; mRNA processing; negative regulation of catalytic activity; negative regulation of cell growth; negative regulation of intrinsic apoptotic signaling pathway in response to DNA damage; negative regulation of proteasomal ubiquitin-dependent protein catabolic process; negative regulation …	enzyme binding; enzyme inhibitor activity; RNA binding; RNA polymerase II core binding;
KLEAERFENL	REIGNLLHPSVPISNDEDVDNKVER	P49591			Serine--tRNA ligase, cytoplasmic;	9.469	131	514	Seryl-tRNA synthetase;Seryl-tRNA(Ser/Sec) synthetase;	cytoplasm; cytosol; extracellular exosome;	selenocysteine metabolic process; selenocysteinyl-tRNA(Sec) biosynthetic process; seryl-tRNA aminoacylation; translation; tRNA aminoacylation for protein translation; tRNA processing;	ATP binding; RNA binding; selenocysteine-tRNA ligase activity; serine-tRNA ligase activity;
VRGLKREDLR	RGLVMVK	P49411			Elongation factor Tu, mitochondrial;	9.469	334	452	P43;	extracellular exosome; membrane; mitochondrial inner membrane; mitochondrial nucleoid; mitochondrion; myelin sheath;	response to ethanol; translational elongation;	GTP binding; GTPase activity; RNA binding; translation elongation factor activity;
PSLSVPWLQD	RIEDSGENLETEPLESQDR	P78345			Ribonuclease P protein subunit p38;	9.469	209	283		fibrillar center; nucleolar ribonuclease P complex; nucleolus; nucleoplasm; nucleus;	rRNA processing; tRNA 5'-leader removal;	ribonuclease P activity;
WRATRVEILR	RLLVTSQAR	Q5T4S7			E3 ubiquitin-protein ligase UBR4;	9.469	5059	5183	600 kDa retinoblastoma protein-associated factor;N-recognin-4;RING-type E3 ubiquitin transferase UBR4;Retinoblastoma-associated factor of 600 kDa;Zinc finger UBR1-type protein 1;	centrosome; cytosol; ficolin-1-rich granule membrane; integral component of membrane; membrane; nucleoplasm; plasma membrane; specific granule membrane; tertiary granule membrane;	neutrophil degranulation; protein ubiquitination involved in ubiquitin-dependent protein catabolic process; viral process;	calmodulin binding; ubiquitin-protein transferase activity; zinc ion binding;
ARLDVRDAWG	RLPVDLAEELGHR	P42771			Cyclin-dependent kinase inhibitor 2A {ECO:0000312|HGNC:HGNC:1787};	9.469	110	156	Cyclin-dependent kinase 4 inhibitor A;Multiple tumor suppressor 1;p16-INK4a;	cytoplasm; cytosol; nucleus; senescence-associated heterochromatin focus;	cell cycle arrest; cellular senescence; G1/S transition of mitotic cell cycle; negative regulation of cell growth; negative regulation of cell proliferation; negative regulation of cell-matrix adhesion; negative regulation of cyclin-dependent protein serine/threonine kinase activity; negative regulation of NF-kappaB transcription factor activity; negative regulation of phosphorylation; negative r…	cyclin-dependent protein serine/threonine kinase inhibitor activity; NF-kappaB binding; protein kinase binding; RNA binding;
RYKQKKELEH	RLSAMKSAVESGQADDER	P78318			Immunoglobulin-binding protein 1;	9.469	169	339	B-cell signal transduction molecule alpha 4;CD79a-binding protein 1;Protein phosphatase 2/4/6 regulatory subunit;Renal carcinoma antigen NY-REN-16;	cytoplasm;	B cell activation; negative regulation of cysteine-type endopeptidase activity involved in apoptotic process; negative regulation of stress-activated MAPK cascade; negative regulation of transcription from RNA polymerase II promoter; regulation of microtubule-based movement; response to interleukin-1; response to tumor necrosis factor; signal transduction;	protein phosphatase regulator activity;
RVYLHLRRTR	RPKEEDPATGTGDPPR	P45974			Ubiquitin carboxyl-terminal hydrolase 5;	9.469	76	858	Deubiquitinating enzyme 5;Isopeptidase T;Ubiquitin thioesterase 5;Ubiquitin-specific-processing protease 5;	cytosol; lysosome;	positive regulation of proteasomal ubiquitin-dependent protein catabolic process; protein deubiquitination; protein K48-linked deubiquitination; protein ubiquitination; ubiquitin-dependent protein catabolic process;	cysteine-type endopeptidase activity; thiol-dependent ubiquitin-specific protease activity; thiol-dependent ubiquitinyl hydrolase activity; ubiquitin binding; zinc ion binding;
TPSPLDASPR	RPPGPTTSPASTSLSSPGQR	Q01970			1-phosphatidylinositol 4,5-bisphosphate phosphodiesterase beta-3;	9.469	917	1234	Phosphoinositide phospholipase C-beta-3;Phospholipase C-beta-3;	cytosol; membrane; nucleoplasm; protein complex;	chemical synaptic transmission; inositol phosphate metabolic process; intracellular signal transduction; lipid catabolic process; regulation of systemic arterial blood pressure; Wnt signaling pathway, calcium modulating pathway;	cadherin binding; calcium ion binding; calmodulin binding; phosphatidylinositol phospholipase C activity; phospholipase C activity; signal transducer activity;
EAQIKVNQCD	RTSLSSAKDVLQR	Q86VD1			MORC family CW-type zinc finger protein 1;	9.469	313	984	Cancer/testis antigen 33;	nucleus;	cell differentiation; DNA hypermethylation; DNA methylation involved in gamete generation; multicellular organism development; negative regulation of DNA-templated transcription, initiation; negative regulation of transposition; regulation of gene expression, epigenetic; spermatogenesis;	zinc ion binding;
SADPELALAL	RVSMEEQR	P55036			26S proteasome non-ATPase regulatory subunit 4;	9.469	219	377	26S proteasome regulatory subunit RPN10;26S proteasome regulatory subunit S5A;Antisecretory factor 1;Multiubiquitin chain-binding protein;	cytosol; nucleoplasm; nucleus; proteasome accessory complex; proteasome complex; proteasome regulatory particle, base subcomplex;	anaphase-promoting complex-dependent catabolic process; antigen processing and presentation of exogenous peptide antigen via MHC class I, TAP-dependent; Fc-epsilon receptor signaling pathway; MAPK cascade; negative regulation of canonical Wnt signaling pathway; negative regulation of G2/M transition of mitotic cell cycle; negative regulation of ubiquitin-protein ligase activity involved in mitoti…	identical protein binding; polyubiquitin binding; RNA binding;
RLVNWSCTLN	SAISDIEVDKKELTGR	P26640			Valine--tRNA ligase;	9.469	481	1264	Protein G7a;Valyl-tRNA synthetase;	cytosol; mitochondrion;	tRNA aminoacylation for protein translation; valyl-tRNA aminoacylation;	aminoacyl-tRNA editing activity; ATP binding; valine-tRNA ligase activity;
VRKQRYVFDI	SALEKDGLLGAELR	P43026			Growth/differentiation factor 5;	9.469	225	501	Bone morphogenetic protein 14;Cartilage-derived morphogenetic protein 1;Lipopolysaccharide-associated protein 4;Radotermin;	extracellular region; extracellular space; intracellular; plasma membrane;	cell development; cell-cell signaling; chondroblast differentiation; chondrocyte differentiation; embryonic limb morphogenesis; forelimb morphogenesis; hindlimb morphogenesis; negative regulation of chondrocyte differentiation; negative regulation of epithelial cell proliferation; negative regulation of mesenchymal cell apoptotic process; negative regulation of neuron apoptotic process; ossificat…	BMP binding; cytokine activity; growth factor activity; identical protein binding; transforming growth factor beta receptor binding;
TTLQSTYSDT	SAQPTCDYGYGTWNSGTNR	Q9ULX6			A-kinase anchor protein 8-like;	9.469	20	646	Helicase A-binding protein 95;Homologous to AKAP95 protein;Neighbor of A-kinase-anchoring protein 95;	chromatin; cytoplasm; nuclear matrix; nuclear speck; nucleus; PML body;	cell cycle G2/M phase transition; mitotic chromosome condensation; mRNA processing; nuclear envelope disassembly; positive regulation of histone deacetylation; positive regulation of transcription from RNA polymerase II promoter; regulation of histone phosphorylation; regulation of mRNA export from nucleus; RNA splicing; transcription, DNA-templated;	DEAD/H-box RNA helicase binding; DNA binding; histone deacetylase binding; lamin binding; metal ion binding; protein kinase A regulatory subunit binding; RNA binding;
HNGWDDLEFL	SDITEEDLEEAGVQDPAHKR	O15357			Phosphatidylinositol 3,4,5-trisphosphate 5-phosphatase 2;	9.469	1227	1258	Inositol polyphosphate phosphatase-like protein 1;Protein 51C;SH2 domain-containing inositol 5'-phosphatase 2;	cytoskeleton; cytosol; filopodium; Golgi apparatus; lamellipodium; plasma membrane;	actin filament organization; cell adhesion; endochondral ossification; endocytosis; glucose metabolic process; immune system process; inositol phosphate metabolic process; negative regulation of cell proliferation; negative regulation of gene expression; phosphatidylinositol biosynthetic process; phosphatidylinositol dephosphorylation; post-embryonic development; response to insulin; ruffle assem…	actin binding; inositol-1,3,4,5-tetrakisphosphate 5-phosphatase activity; phosphatidylinositol-3,4,5-trisphosphate 5-phosphatase activity; SH2 domain binding; SH3 domain binding;
KANWYFLLAR	SDPDPKAPANKAFTGFIVEADTPGIQIGR	P11310			Medium-chain specific acyl-CoA dehydrogenase, mitochondrial;	9.469	205	421		axon; extracellular exosome; mitochondrial matrix; mitochondrion; nuclear speck; nucleus;	carnitine biosynthetic process; carnitine metabolic process, CoA-linked; fatty acid beta-oxidation; fatty acid beta-oxidation using acyl-CoA dehydrogenase; medium-chain fatty acid catabolic process; medium-chain fatty acid metabolic process; oxidation-reduction process;	acyl-CoA dehydrogenase activity; flavin adenine dinucleotide binding; identical protein binding; medium-chain-acyl-CoA dehydrogenase activity;
ALLSLAKGDR	SEDFGVNEDLADSDAR	P04083			Annexin A1;	9.469	187	346	Annexin I;Annexin-1;Calpactin II;Calpactin-2;Chromobindin-9;Lipocortin I {ECO:0000303|PubMed:1832554};Phospholipase A2 inhibitory protein;p35;	apical plasma membrane; basolateral plasma membrane; cell surface; cell-cell adherens junction; cornified envelope; cytoplasm; cytoplasmic vesicle membrane; cytosol; early endosome membrane; endosome; extracellular exosome; extracellular region; extracellular space; extrinsic component of endosome membrane; extrinsic component of external side of plasma membrane; extrinsic component of membrane; …	actin cytoskeleton reorganization; adaptive immune response; alpha-beta T cell differentiation; arachidonic acid secretion; cell surface receptor signaling pathway; cellular response to glucocorticoid stimulus; cellular response to hydrogen peroxide; DNA duplex unwinding; DNA rewinding; endocrine pancreas development; estrous cycle; G-protein coupled receptor signaling pathway, coupled to cyclic …	annealing helicase activity; cadherin binding involved in cell-cell adhesion; calcium ion binding; calcium-dependent phospholipid binding; calcium-dependent protein binding; double-stranded DNA-dependent ATPase activity; helicase activity; phospholipase A2 inhibitor activity; phospholipid binding; protein binding, bridging; protein homodimerization activity; receptor binding; single-stranded DNA …
AVEKDKSKAR	SEDTGLDSVATR	O94966			Ubiquitin carboxyl-terminal hydrolase 19;	9.469	432	1318	Deubiquitinating enzyme 19;Ubiquitin thioesterase 19;Ubiquitin-specific-processing protease 19;Zinc finger MYND domain-containing protein 9;	cytosol; endoplasmic reticulum membrane; integral component of membrane;	negative regulation of proteasomal protein catabolic process; negative regulation of skeletal muscle tissue development; positive regulation of cell cycle process; protein deubiquitination; protein stabilization; regulation of cellular response to hypoxia; regulation of ERAD pathway; regulation of protein stability; response to endoplasmic reticulum stress; ubiquitin-dependent ERAD pathway;	Hsp90 protein binding; Lys48-specific deubiquitinase activity; metal ion binding; thiol-dependent ubiquitin-specific protease activity; thiol-dependent ubiquitinyl hydrolase activity; ubiquitin protein ligase binding;
TDNLTLTVAR	SEHKVWSPLVTEEGKR	O00151			PDZ and LIM domain protein 1;	9.469	82	329	C-terminal LIM domain protein 1;Elfin;LIM domain protein CLP-36;	cell-cell adherens junction; cytoplasm; cytoskeleton; focal adhesion; transcription factor complex;	regulation of transcription, DNA-templated; response to hypoxia; response to oxidative stress;	cadherin binding involved in cell-cell adhesion; transcription coactivator activity; zinc ion binding;
LIVYAHQEPK	SFNGSLKNVAVDELSR	P16083			Ribosyldihydronicotinamide dehydrogenase [quinone];	9.469	15	231	NRH dehydrogenase [quinone] 2;NRH:quinone oxidoreductase 2;Quinone reductase 2;	cytosol; extracellular exosome; nucleoplasm;	memory; oxidation-reduction process; positive regulation of ERK1 and ERK2 cascade; positive regulation of neuron apoptotic process; positive regulation of reactive oxygen species metabolic process; positive regulation of vascular smooth muscle cell proliferation; xenobiotic metabolic process;	chloride ion binding; dihydronicotinamide riboside quinone reductase activity; electron carrier activity; FAD binding; melatonin binding; oxidoreductase activity; oxidoreductase activity, acting on other nitrogenous compounds as donors; protein homodimerization activity; resveratrol binding; zinc ion binding;
VSQGMIQLAL	SGASQPGPSGAPAQR	Q86VR2			Protein FAM134C;	9.469	409	466		integral component of membrane;	positive regulation of neuron projection development;
SNLMVCNLAY	SGKLEELKESILADKSLATR	O75832			26S proteasome non-ATPase regulatory subunit 10;	9.469	14	226	26S proteasome regulatory subunit p28;Gankyrin;p28(GANK);	cytoplasm; cytosol; intermediate filament cytoskeleton; nucleoplasm; nucleus; proteasome complex; proteasome regulatory particle;	anaphase-promoting complex-dependent catabolic process; antigen processing and presentation of exogenous peptide antigen via MHC class I, TAP-dependent; apoptotic process; cytoplasmic sequestering of NF-kappaB; Fc-epsilon receptor signaling pathway; MAPK cascade; negative regulation of apoptotic process; negative regulation of canonical Wnt signaling pathway; negative regulation of DNA damage res…	transcription factor binding;
MGSRLGQMVL	SGVDTVLGKSEEWADNHLPLTDAELAR	O60664			Perilipin-3;	9.469	185	434	47 kDa mannose 6-phosphate receptor-binding protein;Cargo selection protein TIP47;Mannose-6-phosphate receptor-binding protein 1;Placental protein 17;	cytoplasm; cytosol; endosome; endosome membrane; Golgi apparatus; lipid particle; membrane; transport vesicle;	vesicle-mediated transport;	cadherin binding;
KPEQASPSAH	SHATSPLEEFKR	Q9NXE4			Sphingomyelin phosphodiesterase 4;	9.469	353	827	Neutral sphingomyelinase 3;Neutral sphingomyelinase III;	endoplasmic reticulum; endoplasmic reticulum membrane; Golgi apparatus; Golgi membrane; integral component of membrane; trans-Golgi network;	cellular response to tumor necrosis factor; ceramide biosynthetic process; glycerophospholipid catabolic process; glycosphingolipid metabolic process; sphingomyelin catabolic process;	metal ion binding; sphingomyelin phosphodiesterase activity; sphingomyelin phosphodiesterase D activity;
TPSTYISHLE	SHLGFQMKDMTR	Q9NRE2			Teashirt homolog 2;	9.469	945	1034	Ovarian cancer-related protein 10-2;Zinc finger protein 218;	nucleus;	multicellular organism development; regulation of transcription from RNA polymerase II promoter; transcription, DNA-templated;	chromatin binding; DNA binding; metal ion binding; transcriptional repressor activity, RNA polymerase II core promoter proximal region sequence-specific binding;
SLIQKEDSDG	SIECVNEER	Q9UKX5			Integrin alpha-11;	9.469	876	1188		focal adhesion; integrin alpha11-beta1 complex; integrin complex; membrane; plasma membrane;	cell adhesion; cell adhesion mediated by integrin; cell-matrix adhesion; collagen-activated signaling pathway; extracellular matrix organization; integrin-mediated signaling pathway; muscle organ development; osteoblast differentiation; substrate-dependent cell migration;	collagen binding; collagen binding involved in cell-matrix adhesion; collagen receptor activity; metal ion binding;
GAHPVPVYAF	SIKGPSYGEDVSNTTTAQKR	P29590			Protein PML;	9.469	456	882	Promyelocytic leukemia protein;RING finger protein 71;Tripartite motif-containing protein 19;	cytoplasm; cytosol; early endosome membrane; extrinsic component of endoplasmic reticulum membrane; heterochromatin; nuclear chromosome, telomeric region; nuclear matrix; nuclear membrane; nucleolus; nucleoplasm; nucleus; PML body;	activation of cysteine-type endopeptidase activity involved in apoptotic process; apoptotic process; branching involved in mammary gland duct morphogenesis; cell cycle arrest; cell fate commitment; cellular response to interleukin-4; cellular senescence; circadian regulation of gene expression; common-partner SMAD protein phosphorylation; defense response to virus; DNA damage response, signal tra…	cobalt ion binding; DNA binding; protein heterodimerization activity; protein homodimerization activity; SMAD binding; SUMO binding; transcription coactivator activity; ubiquitin protein ligase binding; zinc ion binding;
DMERIWQYVY	SKDQLQTFSEEHPVLLTEAPLNPR	P61163			Alpha-centractin;	9.469	93	376	ARP1;Actin-RPV;Centrosome-associated actin homolog;	centriole; centrosome; COPI-coated vesicle; cytoplasm; cytosol; dynactin complex; extracellular exosome; manchette; microtubule associated complex; microtubule cytoskeleton; myelin sheath;	antigen processing and presentation of exogenous peptide antigen via MHC class II; ciliary basal body docking; G2/M transition of mitotic cell cycle; spermatogenesis; vesicle-mediated transport;	ATP binding;
SVETWPWQVL	SKGDKEEVAYEER	Q9NRV9			Heme-binding protein 1;	9.469	20	189	p22HBP;	cytoplasm; extracellular exosome; extracellular region;	circadian rhythm;	heme binding;
IIQEIYSQIQ	SKKKILATPPQEDAPSVDIANIR	P29401			Transketolase;	9.469	278	623		cytosol; extracellular exosome; myelin sheath; nuclear body; nuclear speck; nucleoplasm; peroxisome; vesicle;	glyceraldehyde-3-phosphate biosynthetic process; pentose-phosphate shunt; pentose-phosphate shunt, non-oxidative branch; regulation of growth; xylulose biosynthetic process;	cofactor binding; metal ion binding; protein homodimerization activity; transketolase activity;
SLSTFQQMWI	SKQEYDESGPSIVHR	P60709	Q9BYX7	P63261	Actin, cytoplasmic 1;	9.469	1056	1075	Beta-actin;	blood microparticle; cortical cytoskeleton; cytoplasm; cytoplasmic ribonucleoprotein granule; cytoskeleton; cytosol; dense body; extracellular exosome; extracellular space; focal adhesion; intracellular ribonucleoprotein complex; membrane; myelin sheath; NuA4 histone acetyltransferase complex; nuclear chromatin; nucleoplasm; plasma membrane; protein complex; vesicle;	ATP-dependent chromatin remodeling; cell junction assembly; ephrin receptor signaling pathway; Fc-gamma receptor signaling pathway involved in phagocytosis; membrane organization; movement of cell or subcellular component; platelet aggregation; positive regulation of gene expression, epigenetic; postsynaptic actin cytoskeleton organization; protein deubiquitination; retina homeostasis; substantia…	ATP binding; identical protein binding; kinesin binding; nitric-oxide synthase binding; structural constituent of cytoskeleton; structural constituent of postsynaptic actin cytoskeleton; Tat protein binding;
NCPLYITKVM	SKSSAEVIAQAR	Q16555			Dihydropyrimidinase-related protein 2;	9.469	255	572	Collapsin response mediator protein 2;N2A3;Unc-33-like phosphoprotein 2;	cytoskeleton; cytosol; extracellular exosome; plasma membrane;	axon guidance; brain development; cytoskeleton organization; endocytosis; nervous system development; nucleobase-containing compound metabolic process; regulation of axon extension; signal transduction;	dihydropyrimidinase activity; identical protein binding; microtubule binding;
VFSRNHAAPF	SKVLTFLR	Q92598			Heat shock protein 105 kDa;	9.469	427	858	Antigen NY-CO-25;Heat shock 110 kDa protein;	cytoplasm; cytosol; endocytic vesicle lumen; extracellular exosome; extracellular region; microtubule; nucleoplasm;	chaperone mediated protein folding requiring cofactor; negative regulation of establishment of protein localization to mitochondrion; negative regulation of intrinsic apoptotic signaling pathway in response to hydrogen peroxide; negative regulation of p38MAPK cascade; positive regulation of MHC class I biosynthetic process; positive regulation of NK T cell activation; positive regulation of prote…	adenyl-nucleotide exchange factor activity; alpha-tubulin binding; ATP binding;
GGKGVDLVLN	SLAEEKLQASVR	P49327			Fatty acid synthase;	9.469	1745	2511		cytosol; extracellular exosome; glycogen granule; Golgi apparatus; melanosome; membrane; mitochondrion; plasma membrane;	acetyl-CoA metabolic process; cellular response to interleukin-4; fatty acid biosynthetic process; fatty acid metabolic process; long-chain fatty-acyl-CoA biosynthetic process; mammary gland development; osteoblast differentiation; pantothenate metabolic process; positive regulation of cellular metabolic process;	3-hydroxyoctanoyl-[acyl-carrier-protein] dehydratase activity; 3-hydroxypalmitoyl-[acyl-carrier-protein] dehydratase activity; 3-oxo-pimeloyl-[acp] methyl ester reductase activity; 3-oxoacyl-[acyl-carrier-protein] reductase (NADPH) activity; 3-oxoacyl-[acyl-carrier-protein] synthase activity; [acyl-carrier-protein] S-acetyltransferase activity; [acyl-carrier-protein] S-malonyltransferase activity…
SSLEISSSCF	SLETKLPLSPPLVEDSAFEPSR	O96007			Molybdopterin synthase catalytic subunit {ECO:0000255|HAMAP-Rule:MF_03052};	9.469	10	188	MOCO1-B;Molybdenum cofactor synthesis protein 2 large subunit {ECO:0000255|HAMAP-Rule:MF_03052};Molybdenum cofactor synthesis protein 2B {ECO:0000255|HAMAP-Rule:MF_03052};Molybdopterin-synthase large subunit;	cytosol; molybdopterin synthase complex; nuclear speck; nucleus;	Mo-molybdopterin cofactor biosynthetic process; molybdopterin cofactor biosynthetic process;	molybdopterin synthase activity;
SKSAPSSRSR	SLTLLPHGTPNSASPCSQR	Q9BXB5			Oxysterol-binding protein-related protein 10;	9.469	186	764		cytoskeleton; cytosol;	phosphatidylserine acyl-chain remodeling;	cholesterol binding; phosphatidylserine binding; phospholipid transporter activity;
PGTGQFFVMM	SPQEVLQGGSQR	P22415			Upstream stimulatory factor 1;	9.469	163	310	Class B basic helix-loop-helix protein 11;Major late transcription factor 1;	nuclear chromatin; nucleoplasm; nucleus; transcription factor complex;	carbon catabolite regulation of transcription; cellular response to insulin stimulus; glucose homeostasis; glucose metabolic process; late viral transcription; lipid homeostasis; negative regulation of fibrinolysis; positive regulation of transcription from RNA polymerase II promoter; positive regulation of transcription from RNA polymerase II promoter by glucose; regulation of transcription from…	bHLH transcription factor binding; double-stranded DNA binding; enzyme binding; histone deacetylase binding; identical protein binding; protein heterodimerization activity; protein homodimerization activity; protein kinase binding; sequence-specific DNA binding; transcription factor activity, RNA polymerase II distal enhancer sequence-specific binding;
GISVLEMSHR	SSDFAKIINNTENLVR	Q9Y617			Phosphoserine aminotransferase;	9.469	44	370	Phosphohydroxythreonine aminotransferase;	cytoplasm; cytosol; extracellular exosome;	L-serine biosynthetic process; pyridoxine biosynthetic process;	O-phospho-L-serine;
EVGVLVGKDR	SSFYVNGLTLGGQKCSVIR	P07737			Profilin-1;	9.469	55	140	Epididymis tissue protein Li 184a;Profilin I;	blood microparticle; cell cortex; cytoplasm; cytoskeleton; cytosol; extracellular exosome; focal adhesion; membrane; neuron projection; nucleus; synapse;	actin cytoskeleton organization; cellular response to growth factor stimulus; negative regulation of actin filament bundle assembly; negative regulation of actin filament polymerization; negative regulation of stress fiber assembly; neural tube closure; positive regulation of actin filament bundle assembly; positive regulation of actin filament polymerization; positive regulation of ATPase activi…	actin binding; actin monomer binding; adenyl-nucleotide exchange factor activity; cadherin binding; phosphatidylinositol-4,5-bisphosphate binding; proline-rich region binding; receptor binding; Rho GTPase binding; RNA binding;
GGQRAAWRVL	SSIEQKSNEEGSEEKGPEVR	P31947			14-3-3 protein sigma;	9.469	61	248	Epithelial cell marker protein 1;Stratifin;	cytoplasmic vesicle membrane; cytosol; extracellular exosome; extracellular space; mitochondrion; nucleus;	DNA damage response, signal transduction by p53 class mediator resulting in cell cycle arrest; establishment of skin barrier; intrinsic apoptotic signaling pathway in response to DNA damage; keratinization; keratinocyte development; membrane organization; negative regulation of cysteine-type endopeptidase activity involved in apoptotic process; negative regulation of keratinocyte proliferation; n…	cadherin binding; identical protein binding; phosphoprotein binding; protein domain specific binding; protein kinase binding; protein kinase C inhibitor activity;
SGLNLNIPIL	SSLGSSAPSESHPSDFQR	Q5VT52			Regulation of nuclear pre-mRNA domain-containing protein 2;	9.469	691	1461		DNA-directed RNA polymerase II, holoenzyme; nucleoplasm;	snRNA transcription from RNA polymerase II promoter;
ELALKATLVE	SSTSGFTPGGGGSSVSMIASR	P49321			Nuclear autoantigenic sperm protein;	9.469	675	788		cytoplasm; nuclear chromatin; nucleoplasm; nucleus; protein complex;	blastocyst development; cell cycle; cell proliferation; DNA replication; DNA replication-dependent nucleosome assembly; DNA replication-independent nucleosome assembly; histone exchange; male gonad development; nucleosome assembly; protein transport; response to testosterone;	histone binding; Hsp90 protein binding; protein complex binding;
PAQPGTPPLS	STQLQIDPSLHEFQLVDLSR	P98160			Basement membrane-specific heparan sulfate proteoglycan core protein;	9.469	566	4391	Perlecan;	basement membrane; extracellular exosome; extracellular matrix; extracellular region; extracellular space; focal adhesion; Golgi lumen; lysosomal lumen; plasma membrane;	angiogenesis; cellular protein metabolic process; extracellular matrix disassembly; extracellular matrix organization; glycosaminoglycan biosynthetic process; glycosaminoglycan catabolic process; glycosaminoglycan metabolic process; retinoid metabolic process;	calcium ion binding; protein C-terminus binding;
TVPTLAPKTL	SVAAAFNEDEDSEPEEMPPEAKMR	Q8WW12			PEST proteolytic signal-containing nuclear protein;	9.469	106	178		nuclear body; nucleus;	cell cycle; proteasome-mediated ubiquitin-dependent protein catabolic process; protein ubiquitination;
KWHDSRRWQL	SVATEQPELEGPR	Q9NR30			Nucleolar RNA helicase 2 {ECO:0000305};	9.469	704	783	DEAD box protein 21;Gu-alpha;Nucleolar RNA helicase Gu;Nucleolar RNA helicase II;RH II/Gu;	membrane; nucleolus; nucleoplasm; nucleus;	osteoblast differentiation; positive regulation of gene expression, epigenetic; response to exogenous dsRNA; response to virus; RNA secondary structure unwinding; rRNA processing; transcription from RNA polymerase II promoter;	7SK snRNA binding; ATP binding; ATP-dependent RNA helicase activity; double-stranded RNA binding; RNA binding; rRNA binding; snoRNA binding;
SYNLAQPINF	SVSLSNSHEKNQSWR	O15027			Protein transport protein Sec16A;	9.469	666	2179	SEC16 homolog A;	cytosol; endoplasmic reticulum; endoplasmic reticulum membrane; Golgi apparatus; Golgi membrane;	COPII vesicle coating; endoplasmic reticulum organization; protein transport; substantia nigra development;
M	TAEDSTAAMSSDSAAGSSAKVPEGVAGAPNEAALLALMER	A0AV96			RNA-binding protein 47;	9.469	0	593	RNA-binding motif protein 47;	nucleus;	cytidine to uridine editing; hematopoietic progenitor cell differentiation;	RNA binding;
AKVYVAKVDC	TAHSDVCSAQGVR	Q8NBS9			Thioredoxin domain-containing protein 5;	9.469	120	432	Endoplasmic reticulum resident protein 46;Thioredoxin-like protein p46;	azurophil granule lumen; endoplasmic reticulum; endoplasmic reticulum lumen; extracellular exosome; extracellular region; lysosomal lumen;	apoptotic cell clearance; cell redox homeostasis; negative regulation of apoptotic process; neutrophil degranulation; protein folding; response to endoplasmic reticulum stress;	protein disulfide isomerase activity;
QLGSRLAWTL	TANQPSSQATTSKGVPSAVSR	Q96CW5			Gamma-tubulin complex component 3;	9.469	206	907	Gamma-ring complex protein 104 kDa;Spindle pole body protein Spc98 homolog;	centriole; centrosome; cytoplasm; cytosol; equatorial microtubule organizing center; gamma-tubulin small complex; membrane; polar microtubule; spindle;	centrosome duplication; cytoplasmic microtubule organization; interphase microtubule nucleation by interphase microtubule organizing center; meiotic nuclear division; microtubule nucleation; mitotic spindle assembly; single fertilization;	gamma-tubulin binding; structural constituent of cytoskeleton; structural molecule activity;
GLRKPWYFPF	TASYWKSVGFLVEKR	Q86UQ4			ATP-binding cassette sub-family A member 13;	9.469	3790	5058		azurophil granule membrane; integral component of membrane; intracellular membrane-bounded organelle; plasma membrane; secretory granule membrane;	lipid transport; neutrophil degranulation;	ATP binding; ATPase activity, coupled to transmembrane movement of substances;
RELPSFLGKR	TDEAAFQKLMSNLDSNR	P26447			Protein S100-A4;	9.469	48	101	Calvasculin;Metastasin;Placental calcium-binding protein;Protein Mts1;S100 calcium-binding protein A4;	extracellular exosome; extracellular space; neuron projection; nucleus; perinuclear region of cytoplasm;	epithelial to mesenchymal transition; positive regulation of I-kappaB kinase/NF-kappaB signaling;	actin binding; calcium ion binding; calcium-dependent protein binding; identical protein binding; RAGE receptor binding; RNA binding; transition metal ion binding;
SPEFIPRRGR	TDPLKFQIER	P49406			39S ribosomal protein L19, mitochondrial;	9.469	85	292	39S ribosomal protein L15, mitochondrial;Mitochondrial large ribosomal subunit protein bL19m {ECO:0000303|PubMed:25278503};	mitochondrial inner membrane; mitochondrial large ribosomal subunit; mitochondrion; nuclear membrane; nucleus;	mitochondrial translational elongation; mitochondrial translational termination;	structural constituent of ribosome;
KGGKNIKALR	TDYNASVSVPDSSGPER	P61978			Heterogeneous nuclear ribonucleoprotein K;	9.469	68	463	Transformation up-regulated nuclear protein;	catalytic step 2 spliceosome; cell projection; cytoplasm; extracellular exosome; extracellular matrix; focal adhesion; membrane; nuclear chromatin; nucleoplasm; nucleus; podosome;	gene expression; mRNA splicing, via spliceosome; negative regulation of apoptotic process; negative regulation of mRNA splicing, via spliceosome; positive regulation of low-density lipoprotein particle receptor biosynthetic process; positive regulation of receptor-mediated endocytosis; positive regulation of transcription from RNA polymerase II promoter; regulation of intrinsic apoptotic signalin…	cadherin binding; RNA binding; RNA polymerase II core promoter proximal region sequence-specific DNA binding; single-stranded DNA binding; transcriptional activator activity, RNA polymerase II core promoter proximal region sequence-specific binding;
QVLKEGHLEK	TEIDEVVLVGGSTR	P48723			Heat shock 70 kDa protein 13;	9.469	395	471	Microsomal stress-70 protein ATPase core;Stress-70 protein chaperone microsome-associated 60 kDa protein;	endoplasmic reticulum; extracellular exosome; intracellular membrane-bounded organelle;		ATP binding;
VAQANDIISS	TEISSAEKVALSSETEVALAR	P27816			Microtubule-associated protein 4;	9.469	426	1152		axoneme; cytoplasm; extracellular exosome; microtubule; microtubule associated complex; mitotic spindle; neuron projection; postsynaptic density;	cell division; establishment of spindle orientation; microtubule sliding; mitotic spindle organization; negative regulation of non-motile cilium assembly; neuron projection development;	microtubule binding; RNA binding; structural molecule activity;
MGLEDEQKML	TESGDPEEEEEEEEELVDPLTTVR	A0A096LP55	P07919		Cytochrome b-c1 complex subunit 6-like, mitochondrial {ECO:0000305};	9.469	9	91		mitochondrial respiratory chain complex III;	aerobic respiration; mitochondrial electron transport, ubiquinol to cytochrome c;	ubiquinol-cytochrome-c reductase activity;
M	TEWETAAPAVAETPDIK	P46782			40S ribosomal protein S5;	9.469	0	204	Small ribosomal subunit protein uS7 {ECO:0000303|PubMed:24524803};	cytosol; cytosolic small ribosomal subunit; extracellular exosome; extracellular matrix; focal adhesion; intracellular ribonucleoprotein complex; membrane; nucleoplasm;	nuclear-transcribed mRNA catabolic process, nonsense-mediated decay; regulation of translational fidelity; rRNA processing; SRP-dependent cotranslational protein targeting to membrane; translation; translational initiation; viral transcription;	mRNA binding; RNA binding; structural constituent of ribosome;
APMDSNLIQL	TGQSFSTDAAGSR	P10398			Serine/threonine-protein kinase A-Raf;	9.469	233	606	Proto-oncogene A-Raf;Proto-oncogene A-Raf-1;Proto-oncogene Pks;	cytosol; mitochondrion;	cell differentiation; cellular protein modification process; MAPK cascade; multicellular organism development; negative regulation of apoptotic process; negative regulation of signal transduction; positive regulation of ERK1 and ERK2 cascade; positive regulation of peptidyl-serine phosphorylation; regulation of proteasomal ubiquitin-dependent protein catabolic process; regulation of TOR signaling;	ATP binding; MAP kinase kinase kinase activity; metal ion binding; mitogen-activated protein kinase kinase binding; protein kinase activity; protein serine/threonine kinase activity;
MK	TILSNQTVDIPENVDITLKGR	P32969			60S ribosomal protein L9;	9.469	1	192	Large ribosomal subunit protein uL6 {ECO:0000303|PubMed:24524803};	cytosol; cytosolic large ribosomal subunit; extracellular matrix; focal adhesion; membrane; nucleus; ribosome;	cytoplasmic translation; nuclear-transcribed mRNA catabolic process, nonsense-mediated decay; rRNA processing; SRP-dependent cotranslational protein targeting to membrane; translation; translational initiation; viral transcription;	RNA binding; rRNA binding; structural constituent of ribosome;
PYPDARIGSF	TIQNVFPQSDGDSSKVKVKVR	O95757			Heat shock 70 kDa protein 4L;	9.469	461	839	Heat shock 70-related protein APG-1;Osmotic stress protein 94;	cytoplasm; cytosol; nucleus;	protein folding; response to unfolded protein;	ATP binding;
YCNGMTRLLL	TKIPFFR	O75312			Zinc finger protein ZPR1;	9.469	63	459	Zinc finger protein 259;	axon; Cajal body; cytoplasm; Gemini of coiled bodies; growth cone; neuronal cell body; nucleolus; nucleoplasm; nucleus; perikaryon; perinuclear region of cytoplasm; SMN complex;	apoptotic process involved in development; axon development; Cajal body organization; cell proliferation; cellular response to epidermal growth factor stimulus; DNA endoreduplication; inner cell mass cell proliferation; microtubule cytoskeleton organization; mRNA processing; negative regulation of motor neuron apoptotic process; positive regulation of gene expression; positive regulation of growt…	receptor tyrosine kinase binding; translation initiation factor binding; zinc ion binding;
EISSSCFSLE	TKLPLSPPLVEDSAFEPSR	O96007			Molybdopterin synthase catalytic subunit {ECO:0000255|HAMAP-Rule:MF_03052};	9.469	13	188	MOCO1-B;Molybdenum cofactor synthesis protein 2 large subunit {ECO:0000255|HAMAP-Rule:MF_03052};Molybdenum cofactor synthesis protein 2B {ECO:0000255|HAMAP-Rule:MF_03052};Molybdopterin-synthase large subunit;	cytosol; molybdopterin synthase complex; nuclear speck; nucleus;	Mo-molybdopterin cofactor biosynthetic process; molybdopterin cofactor biosynthetic process;	molybdopterin synthase activity;
KDGFSKSMVN	TKPEKTEEDSEEVR	Q16543			Hsp90 co-chaperone Cdc37;	9.469	129	378	Hsp90 chaperone protein kinase-targeting subunit;p50Cdc37;	cytoplasm; cytosol; extracellular exosome; HSP90-CDC37 chaperone complex;	ERBB2 signaling pathway; positive regulation of macromitophagy in response to mitochondrial depolarization; posttranscriptional regulation of gene expression; protein folding; protein stabilization; protein targeting; regulation of cyclin-dependent protein serine/threonine kinase activity; regulation of interferon-gamma-mediated signaling pathway; regulation of type I interferon-mediated signalin…	chaperone binding; heat shock protein binding; Hsp90 protein binding; kinase binding; protein kinase binding; protein kinase regulator activity; protein tyrosine kinase activity; unfolded protein binding;
AAKNQVAMNP	TNTIFDAKR	P54652			Heat shock-related 70 kDa protein 2;	9.469	63	639		blood microparticle; CatSper complex; cytosol; extracellular exosome; meiotic spindle; membrane; nucleus;	male meiosis; negative regulation of inclusion body assembly; protein refolding; response to cold; response to heat; response to unfolded protein; spermatid development; spermatogenesis;	ATP binding; disordered domain specific binding; enzyme binding; unfolded protein binding;
FYNKSLAEHR	TPDVLKKCQQAEKILKEQER	P31948			Stress-induced-phosphoprotein 1;	9.469	330	543	Hsc70/Hsp90-organizing protein;Renal carcinoma antigen NY-REN-11;Transformation-sensitive protein IEF SSP 3521;	Golgi apparatus; myelin sheath; nucleus; protein complex;	response to stress;	chaperone binding; Hsp70 protein binding; protein C-terminus binding; RNA binding;
PLSITSKLPR	TQPDGTSVPGEPASPISQR	Q14980			Nuclear mitotic apparatus protein 1 {ECO:0000312|HGNC:HGNC:8059};	9.469	1742	2115	Nuclear matrix protein-22;SP-H antigen {ECO:0000303|PubMed:8408288};	apical part of cell; cell cortex; centrosome; chromosome; cytosol; dendrite; extracellular exosome; Golgi membrane; mitotic spindle; mitotic spindle astral microtubule; mitotic spindle pole; neuronal cell body; nuclear matrix; nucleoplasm; nucleus; protein complex; spindle; spindle microtubule; spindle pole;	anastral spindle assembly; cell division; establishment of mitotic spindle orientation; lung epithelial cell differentiation; meiotic cell cycle; mitotic nuclear division; nucleus organization;	disordered domain specific binding; microtubule binding; protein C-terminus binding; structural molecule activity;
VPAVGQAPDW	TQPLDLPQLEIR	Q9NTG1			Polycystic kidney disease and receptor for egg jelly-related protein;	9.469	272	2253	PKD and REJ homolog;	integral component of membrane; membrane;	acrosome reaction; detection of mechanical stimulus;	calcium channel activity; calcium ion binding;
SQFEMQSRKT	TQSGQMSGEGKAGPPGGSSR	Q16630			Cleavage and polyadenylation specificity factor subunit 6;	9.469	173	551	Cleavage and polyadenylation specificity factor 68 kDa subunit;Pre-mRNA cleavage factor Im 68 kDa subunit;Protein HPBRII-4/7;	intracellular ribonucleoprotein complex; membrane; mRNA cleavage factor complex; nuclear speck; nucleoplasm; nucleus; paraspeckles;	mRNA polyadenylation; mRNA processing; protein tetramerization;	mRNA binding; RNA binding;
KVTGEVLDIL	TRLPESVER	O75955			Flotillin-1;	9.469	400	427		basolateral plasma membrane; caveola; cell-cell adherens junction; cell-cell contact zone; cell-cell junction; centriolar satellite; cytoplasmic vesicle; early endosome; endosome; extracellular exosome; flotillin complex; focal adhesion; integral component of membrane; lamellipodium; lysosomal membrane; melanosome; membrane; membrane raft; microtubule organizing center; plasma membrane; sarcolemm…	axonogenesis; cellular response to exogenous dsRNA; dsRNA transport; establishment of protein localization to plasma membrane; extracellular matrix disassembly; membrane raft assembly; plasma membrane raft assembly; positive regulation of cell adhesion molecule production; positive regulation of cell junction assembly; positive regulation of cell-cell adhesion mediated by cadherin; positive regul…	ionotropic glutamate receptor binding; protease binding; protein heterodimerization activity;
DALVITHYNR	TRQQEEMLGLQEEAPAEKPEEEDLR	O75312			Zinc finger protein ZPR1;	9.469	223	459	Zinc finger protein 259;	axon; Cajal body; cytoplasm; Gemini of coiled bodies; growth cone; neuronal cell body; nucleolus; nucleoplasm; nucleus; perikaryon; perinuclear region of cytoplasm; SMN complex;	apoptotic process involved in development; axon development; Cajal body organization; cell proliferation; cellular response to epidermal growth factor stimulus; DNA endoreduplication; inner cell mass cell proliferation; microtubule cytoskeleton organization; mRNA processing; negative regulation of motor neuron apoptotic process; positive regulation of gene expression; positive regulation of growt…	receptor tyrosine kinase binding; translation initiation factor binding; zinc ion binding;
SLIHFCWKDR	TSGNVEDDLIIFPDDCEFKR	Q16186			Proteasomal ubiquitin receptor ADRM1;	9.469	63	407	110 kDa cell membrane glycoprotein;Adhesion-regulating molecule 1;Proteasome regulatory particle non-ATPase 13;Rpn13 homolog;	cytosol; integral component of plasma membrane; membrane; nucleoplasm; plasma membrane; proteasome complex; proteasome regulatory particle, lid subcomplex;	proteasome assembly; protein deubiquitination; transcription elongation from RNA polymerase II promoter; ubiquitin-dependent protein catabolic process;	endopeptidase activator activity; protease binding; proteasome binding; ubiquitin binding;
RMKTKGEKVR	TTETQVFVATPQKNFLQER	P49590			Probable histidine--tRNA ligase, mitochondrial;	9.469	405	506	Histidine--tRNA ligase-like;Histidyl-tRNA synthetase;	mitochondrial matrix; mitochondrion;	histidyl-tRNA aminoacylation; translation; tRNA aminoacylation for protein translation;	ATP binding; histidine-tRNA ligase activity; protein homodimerization activity; RNA binding;
VVRKSIARVL	TVINQTQKENLR	P42766			60S ribosomal protein L35;	9.469	57	123	Large ribosomal subunit protein uL29 {ECO:0000303|PubMed:24524803};	cytosol; cytosolic large ribosomal subunit; membrane; nucleolus;	maturation of LSU-rRNA from tricistronic rRNA transcript (SSU-rRNA, 5.8S rRNA, LSU-rRNA); nuclear-transcribed mRNA catabolic process, nonsense-mediated decay; rRNA processing; SRP-dependent cotranslational protein targeting to membrane; translation; translational initiation; viral transcription;	mRNA binding; RNA binding; structural constituent of ribosome;
VQKRAIRTLW	TVLDAIDQMWLPVVR	P18669	Q8N0Y7		Phosphoglycerate mutase 1;	9.469	67	254	BPG-dependent PGAM 1;Phosphoglycerate mutase isozyme B;	cytoplasm; cytosol; extracellular exosome; extracellular region; ficolin-1-rich granule lumen; membrane; myelin sheath; nucleus; secretory granule lumen;	canonical glycolysis; gluconeogenesis; glycolytic process; neutrophil degranulation; regulation of glycolytic process; regulation of pentose-phosphate shunt; respiratory burst;	2,3-bisphosphoglycerate-dependent phosphoglycerate mutase activity; bisphosphoglycerate mutase activity; hydrolase activity; phosphoglycerate mutase activity; protein kinase binding;
QCVSNNRDGR	TVNSNCEINNR	Q15154			Pericentriolar material 1 protein;	9.469	575	2024		apical part of cell; centriolar satellite; centriole; centrosome; ciliary basal body; ciliary transition zone; cytoplasm; cytosol; membrane; nuclear membrane; pericentriolar material; protein complex;	centrosome organization; ciliary basal body docking; cilium assembly; cytoplasmic microtubule organization; G2/M transition of mitotic cell cycle; interkinetic nuclear migration; intraciliary transport involved in cilium assembly; microtubule anchoring; microtubule anchoring at centrosome; negative regulation of neurogenesis; neuron migration; neuronal stem cell population maintenance; non-motile…	identical protein binding;
KRDNSDFDLL	TVSETANEPPQDEGNSFNSPR	O15371			Eukaryotic translation initiation factor 3 subunit D {ECO:0000255|HAMAP-Rule:MF_03003};	9.469	288	548	Eukaryotic translation initiation factor 3 subunit 7 {ECO:0000255|HAMAP-Rule:MF_03003};eIF-3-zeta {ECO:0000255|HAMAP-Rule:MF_03003};eIF3 p66;	cytosol; eukaryotic translation initiation factor 3 complex; eukaryotic translation initiation factor 3 complex, eIF3m; membrane;	cap-dependent translational initiation; formation of cytoplasmic translation initiation complex; IRES-dependent viral translational initiation; positive regulation of mRNA binding; positive regulation of translation; translational initiation; viral translational termination-reinitiation;	mRNA cap binding; RNA binding; translation initiation factor activity;
WHHTFYNELR	VAPEEHPVLLTEATLNPKANR	A5A3E0			POTE ankyrin domain family member F;	9.469	794	1075	ANKRD26-like family C member 1B;Chimeric POTE-actin protein;	blood microparticle; cell cortex; extracellular exosome; extracellular space;	retina homeostasis;
AGTPAVIRIS	VATGALEAAQGSKSQCQTR	P51610			Host cell factor 1;	9.469	1149	2035	C1 factor;CFF;VCAF;VP16 accessory protein;	axon; cytoplasm; dendrite; histone acetyltransferase complex; membrane; MLL1 complex; neuronal cell body; nucleoplasm; nucleus; Set1C/COMPASS complex;	cell cycle; cellular response to organic cyclic compound; histone H4-K16 acetylation; histone H4-K5 acetylation; histone H4-K8 acetylation; mitochondrion organization; negative regulation of transcription from RNA polymerase II promoter; positive regulation of cell cycle; positive regulation of gene expression; protein deubiquitination; protein stabilization; regulation of protein complex assembl…	activating transcription factor binding; cadherin binding; chromatin binding; identical protein binding; transcription coactivator activity; transcription factor activity, sequence-specific DNA binding; transcriptional activator activity, RNA polymerase II distal enhancer sequence-specific binding;
MSRFDLFFIL	VDECNEVTDYAIAR	Q14566			DNA replication licensing factor MCM6;	9.469	535	821	p105MCM;	MCM complex; nuclear chromosome, telomeric region; nucleoplasm; nucleus;	DNA replication; DNA replication initiation; DNA unwinding involved in DNA replication; G1/S transition of mitotic cell cycle;	ATP binding; DNA helicase activity; identical protein binding; single-stranded DNA binding;
QAYLDYLRRR	VDFKQDSSKELEELR	Q15020			Squamous cell carcinoma antigen recognized by T-cells 3 {ECO:0000305};	9.469	430	963	Tat-interacting protein of 110 kDa {ECO:0000303|PubMed:11959860};p110 nuclear RNA-binding protein {ECO:0000303|PubMed:12032085};	Cajal body; cytoplasm; nuclear speck; nucleoplasm; nucleus;	cell morphogenesis; hematopoietic stem cell proliferation; homeostasis of number of cells; mRNA splicing, via spliceosome; nucleosome assembly; positive regulation of histone deubiquitination; regulation of gene expression; spliceosomal snRNP assembly; spliceosomal tri-snRNP complex assembly;	histone binding; RNA binding; U4 snRNA binding; U6 snRNA binding; U6atac snRNA binding; ubiquitin-specific protease binding;
YVSQYYPKLR	VDIRPQLLKNALQR	Q5SSJ5			Heterochromatin protein 1-binding protein 3;	9.469	292	553	Protein HP1-BP74 {ECO:0000303|PubMed:20042602};	chromosome; nuclear speck; nucleosome; nucleus;	cellular response to hypoxia; heterochromatin organization; nucleosome assembly; regulation of cell proliferation; regulation of nucleus size; regulation of transcription, DNA-templated;	DNA binding; nucleosome binding;
AAATGHTVVL	VDQTEDILAKSKKGIEESLR	Q16836			Hydroxyacyl-coenzyme A dehydrogenase, mitochondrial;	9.469	54	314	Medium and short-chain L-3-hydroxyacyl-coenzyme A dehydrogenase;Short-chain 3-hydroxyacyl-CoA dehydrogenase;	cytoplasm; mitochondrial inner membrane; mitochondrial matrix; mitochondrion; nucleoplasm;	fatty acid beta-oxidation; negative regulation of insulin secretion; response to activity; response to drug; response to insulin;	3-hydroxyacyl-CoA dehydrogenase activity; NAD+ binding;
VVTLVEMGFN	VDTLPAYAKR	Q7Z7C8			Transcription initiation factor TFIID subunit 8;	9.469	102	310	Protein taube nuss;TBP-associated factor 43 kDa;TBP-associated factor 8;Transcription initiation factor TFIID 43 kDa subunit;	nucleoplasm; nucleus; perinuclear region of cytoplasm; transcription factor TFIID complex;	cell differentiation; inner cell mass cell proliferation; maintenance of protein location in nucleus; positive regulation of transcription, DNA-templated; regulation of fat cell differentiation; snRNA transcription from RNA polymerase II promoter;	protein heterodimerization activity;
DDIQYFDKLL	VDVDESTLSPEEQKER	O75533			Splicing factor 3B subunit 1;	9.469	478	1304	Pre-mRNA-splicing factor SF3b 155 kDa subunit;Spliceosome-associated protein 155;	catalytic step 2 spliceosome; nuclear speck; nucleoplasm; nucleus; spliceosomal complex; U11/U12 snRNP; U12-type spliceosomal complex; U2 snRNP; U2-type prespliceosome;	mRNA splicing, via spliceosome; positive regulation of gene expression, epigenetic; RNA splicing, via transesterification reactions; spliceosomal complex assembly;	mRNA binding; RNA binding;
QSELEPVVSL	VDVLEEDEELENEACAVLGGSDSEKCSYSQGSVKR	Q8N806			Putative E3 ubiquitin-protein ligase UBR7;	9.469	19	425	N-recognin-7;RING-type E3 ubiquitin transferase UBR7;		protein ubiquitination;	transferase activity; zinc ion binding;
EHQLLQTTKL	VEEHLDSEIQKLDQMDEDELER	O14530			Thioredoxin domain-containing protein 9;	9.469	23	226	ATP-binding protein associated with cell differentiation;Protein 1-4;	centrosome; cytoplasm; midbody; nucleus;	cell redox homeostasis; queuosine biosynthetic process;	cadherin binding;
WGSTVGRWAR	VEGTPSDPNPNDPR	Q96IJ6			Mannose-1-phosphate guanyltransferase alpha;	9.469	351	420	GDP-mannose pyrophosphorylase A;GTP-mannose-1-phosphate guanylyltransferase alpha;	cytoplasm; extracellular exosome;	biosynthetic process;	nucleotidyltransferase activity;
MEEIGIL	VEKAQDEIPALSVSRPQTGLSFLGPEPEDLEDLYSR	P43686			26S protease regulatory subunit 6B;	9.469	6	418	26S proteasome AAA-ATPase subunit RPT3;MB67-interacting protein;MIP224;Proteasome 26S subunit ATPase 4;Tat-binding protein 7;	cytosol; cytosolic proteasome complex; inclusion body; membrane; nuclear proteasome complex; nucleoplasm; nucleus; proteasome accessory complex; proteasome complex; proteasome regulatory particle, base subcomplex; synapse;	anaphase-promoting complex-dependent catabolic process; antigen processing and presentation of exogenous peptide antigen via MHC class I, TAP-dependent; blastocyst development; Fc-epsilon receptor signaling pathway; MAPK cascade; negative regulation of canonical Wnt signaling pathway; negative regulation of G2/M transition of mitotic cell cycle; negative regulation of ubiquitin-protein ligase act…	ATP binding; ATPase activity; proteasome-activating ATPase activity; TBP-class protein binding;
NIPTLEGRIL	VELDETSQGLVPEKTNVKPR	Q15398			Disks large-associated protein 5;	9.469	59	846	Discs large homolog 7;Disks large-associated protein DLG7;Hepatoma up-regulated protein;	cytosol; microtubule organizing center; mitochondrion; nucleus; spindle pole centrosome;	cell proliferation; mitotic chromosome movement towards spindle pole; positive regulation of mitotic metaphase/anaphase transition; signaling;	phosphoprotein phosphatase activity;
LQIAMCAPVM	VELEGETDPLLIAMKELKAR	P61218			DNA-directed RNA polymerases I, II, and III subunit RPABC2;	9.469	79	127	DNA-directed RNA polymerase II subunit F;DNA-directed RNA polymerases I, II, and III 14.4 kDa polypeptide;RPABC14.4;RPB6 homolog;RPC15;	cytosol; DNA-directed RNA polymerase I complex; DNA-directed RNA polymerase II, core complex; DNA-directed RNA polymerase III complex; fibrillar center; nucleoplasm; nucleus;	7-methylguanosine mRNA capping; fibroblast growth factor receptor signaling pathway; gene expression; gene silencing by RNA; mRNA splicing, via spliceosome; positive regulation of gene expression, epigenetic; positive regulation of type I interferon production; positive regulation of viral transcription; snRNA transcription from RNA polymerase II promoter; somatic stem cell population maintenance…	DNA binding; DNA-directed 5'-3' RNA polymerase activity;
VAELALKATL	VESSTSGFTPGGGGSSVSMIASR	P49321			Nuclear autoantigenic sperm protein;	9.469	673	788		cytoplasm; nuclear chromatin; nucleoplasm; nucleus; protein complex;	blastocyst development; cell cycle; cell proliferation; DNA replication; DNA replication-dependent nucleosome assembly; DNA replication-independent nucleosome assembly; histone exchange; male gonad development; nucleosome assembly; protein transport; response to testosterone;	histone binding; Hsp90 protein binding; protein complex binding;
DEEALHYLTR	VEVTEFEDIKSGYR	Q01105	P0DME0		Protein SET;	9.469	121	290	HLA-DR-associated protein II;Inhibitor of granzyme A-activated DNase;PHAPII;Phosphatase 2A inhibitor I2PP2A;Template-activating factor I;	cytoplasm; cytosol; endoplasmic reticulum; lipid particle; nucleoplasm; nucleus; perinuclear region of cytoplasm; protein complex;	DNA replication; negative regulation of histone acetylation; negative regulation of neuron apoptotic process; negative regulation of transcription, DNA-templated; nucleocytoplasmic transport; nucleosome assembly; nucleosome disassembly; regulation of mRNA stability; viral process;	DNA binding; histone binding; protein phosphatase inhibitor activity; protein phosphatase regulator activity;
LSVPVTCKIR	VFPEIDKTVR	Q6P1R4			tRNA-dihydrouridine(16/17) synthase [NAD(P)(+)]-like;	9.469	148	473	tRNA-dihydrouridine synthase 1-like;			flavin adenine dinucleotide binding; tRNA dihydrouridine synthase activity;
CTYLDLLGTW	VFQVGSSGSQR	P53634			Dipeptidyl peptidase 1;	9.469	38	463	Cathepsin C;Cathepsin J;Dipeptidyl peptidase I;Dipeptidyl transferase;	azurophil granule lumen; centrosome; endoplasmic reticulum lumen; endoplasmic reticulum-Golgi intermediate compartment membrane; ER to Golgi transport vesicle; extracellular exosome; extracellular region; extracellular space; Golgi membrane; intracellular membrane-bounded organelle; lysosome; membrane; nucleoplasm;	aging; COPII vesicle coating; ER to Golgi vesicle-mediated transport; immune response; neutrophil degranulation; positive regulation of apoptotic signaling pathway; positive regulation of proteolysis involved in cellular protein catabolic process; proteolysis; proteolysis involved in cellular protein catabolic process; response to organic substance; T cell mediated cytotoxicity;	chaperone binding; chloride ion binding; cysteine-type endopeptidase activity; cysteine-type peptidase activity; identical protein binding; peptidase activator activity involved in apoptotic process; phosphatase binding; protein self-association; serine-type endopeptidase activity;
LVPKLAEELR	VGESNLTNGDEPTQCSR	Q96T76			MMS19 nucleotide excision repair protein homolog;	9.469	533	1030	MET18 homolog;MMS19-like protein;	CIA complex; cytoplasm; cytosol; holo TFIIH complex; membrane; MMXD complex; nucleoplasm; nucleus; spindle;	cellular response to DNA damage stimulus; chromosome segregation; DNA metabolic process; DNA repair; iron-sulfur cluster assembly; nucleotide-excision repair; phosphorelay signal transduction system; positive regulation of transcription, DNA-templated; response to hormone; transcription, DNA-templated;	enzyme binding; estrogen receptor binding; protein binding, bridging; receptor signaling complex scaffold activity; transcription coactivator activity;
VQAAVSNLVR	VGKETVQTTEDQILKR	P18206			Vinculin;	9.469	55	1134	Metavinculin;	adherens junction; brush border; cell; cell-cell adherens junction; cell-cell junction; cell-substrate junction; costamere; cytoskeleton; cytosol; extracellular exosome; extracellular region; extracellular vesicle; fascia adherens; ficolin-1-rich granule lumen; focal adhesion; inner dense plaque of desmosome; membrane raft; outer dense plaque of desmosome; plasma membrane; podosome; protein compl…	adherens junction assembly; apical junction assembly; axon extension; cell adhesion; cell-matrix adhesion; epithelial cell-cell adhesion; lamellipodium assembly; morphogenesis of an epithelium; movement of cell or subcellular component; muscle contraction; negative regulation of cell migration; neutrophil degranulation; platelet aggregation; platelet degranulation; protein localization to cell su…	actin binding; alpha-catenin binding; beta-catenin binding; cadherin binding; dystroglycan binding; structural molecule activity; ubiquitin protein ligase binding;
LALRTFCNCF	VGQAGQKLMMSQR	Q9Y263			Phospholipase A-2-activating protein;	9.469	666	795		cytoplasm; extracellular exosome; nucleus;	inflammatory response; phospholipid metabolic process; proteasome-mediated ubiquitin-dependent protein catabolic process; signal transduction; ubiquitin homeostasis;	phospholipase A2 activator activity; ubiquitin binding;
DFSAPLTISR	VHAGSKAALAALCPGDLIQAINGESTELMTHLEAQNR	P50479			PDZ and LIM domain protein 4;	9.469	30	330	LIM protein RIL;Reversion-induced LIM protein;			zinc ion binding;
EAPRNMVHPN	VICDGCNGPVVGTR	Q13501			Sequestosome-1;	9.469	124	440	EBI3-associated protein of 60 kDa;Phosphotyrosine-independent ligand for the Lck SH2 domain of 62 kDa;Ubiquitin-binding protein p62;	aggresome; amphisome; autolysosome; autophagosome; cytoplasm; cytosol; endoplasmic reticulum; extracellular exosome; inclusion body; intracellular membrane-bounded organelle; late endosome; nucleoplasm; P-body; PML body; pre-autophagosomal structure; sperm midpiece;	apoptotic process; autophagy; cell differentiation; endosomal transport; immune system process; intracellular signal transduction; macroautophagy; macromitophagy; mitophagy; negative regulation of apoptotic process; negative regulation of growth of symbiont in host; negative regulation of transcription from RNA polymerase II promoter; positive regulation of apoptotic process; positive regulation …	identical protein binding; K63-linked polyubiquitin binding; protein homodimerization activity; protein kinase binding; protein kinase C binding; protein serine/threonine kinase activity; receptor tyrosine kinase binding; SH2 domain binding; ubiquitin binding; ubiquitin protein ligase binding; zinc ion binding;
KVKAGDTVSY	VICQDGSNLTASQR	P09884			DNA polymerase alpha catalytic subunit;	9.469	1176	1462	DNA polymerase alpha catalytic subunit p180;	alpha DNA polymerase; cytosol; nuclear envelope; nuclear matrix; nucleolus; nucleoplasm; nucleus;	cell proliferation; DNA replication; DNA replication initiation; DNA replication, synthesis of RNA primer; DNA strand elongation involved in DNA replication; double-strand break repair via nonhomologous end joining; G1/S transition of mitotic cell cycle; lagging strand elongation; leading strand elongation; regulation of transcription involved in G1/S transition of mitotic cell cycle; telomere ma…	3'-5' exonuclease activity; 4 iron, 4 sulfur cluster binding; chromatin binding; DNA binding; DNA-directed DNA polymerase activity; metal ion binding; nucleoside binding; nucleotide binding; protein kinase binding;
IRVPSFAAGR	VIGKGGKTVNELQNLSSAEVVVPR	O00425			Insulin-like growth factor 2 mRNA-binding protein 3;	9.469	500	579	IGF-II mRNA-binding protein 3;KH domain-containing protein overexpressed in cancer;VICKZ family member 3;	cytoplasm; cytosol; nucleus;	anatomical structure morphogenesis; gene expression; mRNA transport; negative regulation of translation; regulation of cytokine biosynthetic process; translation;	mRNA 3'-UTR binding; mRNA 5'-UTR binding; RNA binding; translation regulator activity;
ACRSVKGLVA	VITGGASGLGLATAER	Q99714			3-hydroxyacyl-CoA dehydrogenase type-2;	9.469	12	261	17-beta-hydroxysteroid dehydrogenase 10;3-hydroxy-2-methylbutyryl-CoA dehydrogenase;3-hydroxyacyl-CoA dehydrogenase type II;Endoplasmic reticulum-associated amyloid beta-peptide-binding protein;Mitochondrial ribonuclease P protein 2;Short chain dehydrogenase/reductase family 5C member 1;Short-chain type dehydrogenase/reductase XH98G2;Type II HADH;	cytoplasm; mitochondrial matrix; mitochondrial ribonuclease P complex; mitochondrion; plasma membrane;	branched-chain amino acid catabolic process; lipid metabolic process; mitochondrial tRNA methylation; mitochondrial tRNA processing;	3-hydroxy-2-methylbutyryl-CoA dehydrogenase activity; 3-hydroxyacyl-CoA dehydrogenase activity; cholate 7-alpha-dehydrogenase activity; RNA binding; testosterone dehydrogenase [NAD(P)] activity;
RDVSPYDHSR	VKLQNAENDYINASLVDIEEAQR	P17706			Tyrosine-protein phosphatase non-receptor type 2;	9.469	57	415	T-cell protein-tyrosine phosphatase;	cytosol; endoplasmic reticulum; endoplasmic reticulum-Golgi intermediate compartment; nucleoplasm; nucleus; plasma membrane;	B cell differentiation; erythrocyte differentiation; glucose homeostasis; insulin receptor signaling pathway; negative regulation of cell proliferation; negative regulation of chemotaxis; negative regulation of epidermal growth factor receptor signaling pathway; negative regulation of ERK1 and ERK2 cascade; negative regulation of inflammatory response; negative regulation of insulin receptor sign…	integrin binding; non-membrane spanning protein tyrosine phosphatase activity; protein kinase binding; protein tyrosine phosphatase activity; receptor tyrosine kinase binding; STAT family protein binding; syntaxin binding;
PEKSLIGMTK	VKVGKEDSSSAEFLEKR	Q13596			Sorting nexin-1;	9.469	220	522		cytoplasm; cytosol; early endosome membrane; endosome; endosome membrane; extrinsic component of membrane; Golgi apparatus; intracellular membrane-bounded organelle; lamellipodium; lysosome; membrane; protein complex; retromer complex; retromer, tubulation complex; vesicle;	early endosome to Golgi transport; intracellular protein transport; lamellipodium morphogenesis; positive regulation of protein catabolic process; receptor internalization; retrograde transport, endosome to Golgi; vesicle organization;	cadherin binding; epidermal growth factor receptor binding; identical protein binding; insulin receptor binding; leptin receptor binding; phosphatidylinositol binding; protein heterodimerization activity; protein homodimerization activity; transferrin receptor binding;
LTIGTTHGVF	VLDPFDDLKHR	O14772			Fucose-1-phosphate guanylyltransferase;	9.469	205	594	GDP-L-fucose diphosphorylase;GDP-L-fucose pyrophosphorylase;	cytoplasm; cytosol;	fucose metabolic process;	catalytic activity; fucose-1-phosphate guanylyltransferase activity; GTP binding;
GGAIDFGAAY	VLEQASSHIGNSTQATVR	Q6DD88			Atlastin-3;	9.469	508	541		endoplasmic reticulum; endoplasmic reticulum membrane; endoplasmic reticulum tubular network; integral component of membrane; membrane;	endoplasmic reticulum organization; Golgi organization; protein homooligomerization;	GTP binding; GTPase activity; identical protein binding;
KKQCRRLGHR	VLGLIKPLEMLQDQGKR	Q8NB16			Mixed lineage kinase domain-like protein;	9.469	33	471		cytoplasm; cytosol; plasma membrane;	intracellular signal transduction; necroptotic process; protein homotrimerization;	ATP binding; protein complex binding; protein kinase binding; signal transducer activity;
EEVKEAYMGN	VLQGGEGQAPTR	P24752			Acetyl-CoA acetyltransferase, mitochondrial;	9.469	92	427	Acetoacetyl-CoA thiolase;T2;	extracellular exosome; mitochondrial inner membrane; mitochondrial matrix; mitochondrion;	acetyl-CoA biosynthetic process; acetyl-CoA catabolic process; adipose tissue development; brain development; branched-chain amino acid catabolic process; coenzyme A biosynthetic process; coenzyme A metabolic process; fatty acid beta-oxidation; isoleucine catabolic process; ketone body biosynthetic process; ketone body catabolic process; ketone body metabolic process; liver development; metanephr…	acetyl-CoA C-acetyltransferase activity; carbon-carbon lyase activity; coenzyme binding; enzyme binding; ligase activity, forming carbon-carbon bonds; metal ion binding; protein homodimerization activity;
TENQLQLSVE	VLTSHSCSEEGLEDAANVLLQLSR	Q7Z6Z7			E3 ubiquitin-protein ligase HUWE1;	9.469	3585	4374	ARF-binding protein 1;HECT, UBA and WWE domain-containing protein 1;HECT-type E3 ubiquitin transferase HUWE1;Homologous to E6AP carboxyl terminus homologous protein 9;Large structure of UREB1;Mcl-1 ubiquitin ligase E3;Upstream regulatory element-binding protein 1;	cytoplasm; cytosol; extracellular exosome; extracellular region; ficolin-1-rich granule lumen; membrane; nucleoplasm; nucleus; secretory granule lumen;	base-excision repair; cell differentiation; histone ubiquitination; neutrophil degranulation; positive regulation of protein targeting to mitochondrion; protein monoubiquitination; protein polyubiquitination;	DNA binding; RNA binding; ubiquitin-protein transferase activity;
IMKELNKRGR	VLVNDAQKVTEGQQER	Q13263			Transcription intermediary factor 1-beta;	9.469	310	835	E3 SUMO-protein ligase TRIM28;KRAB-associated protein 1;KRAB-interacting protein 1;Nuclear corepressor KAP-1;RING finger protein 96;RING-type E3 ubiquitin transferase TIF1-beta {ECO:0000305};Tripartite motif-containing protein 28;	nuclear euchromatin; nuclear heterochromatin; nucleoplasm; nucleus; RNA polymerase II transcription factor complex;	convergent extension involved in axis elongation; covalent chromatin modification; DNA methylation involved in embryo development; DNA repair; embryo implantation; embryonic placenta morphogenesis; epithelial to mesenchymal transition; innate immune response; negative regulation of DNA demethylation; negative regulation of single stranded viral RNA replication via double stranded DNA intermediate…	chromatin binding; chromo shadow domain binding; DNA binding; Krueppel-associated box domain binding; promoter-specific chromatin binding; protein kinase activity; RNA binding; RNA polymerase II transcription coactivator activity; sequence-specific DNA binding; transcription corepressor activity; transcription factor activity, sequence-specific DNA binding; ubiquitin protein ligase binding; ubiqu…
KWDNGPDGRR	VMQPQILEVNFNPDCER	Q14166			Tubulin--tyrosine ligase-like protein 12;	9.469	596	644			cellular protein modification process;	ATP binding; catalytic activity;
KYDAPFVFAE	VNADVVDWIQQDDGSVHKSINR	P21980			Protein-glutamine gamma-glutamyltransferase 2;	9.469	395	687	Tissue transglutaminase;Transglutaminase C;Transglutaminase H;Transglutaminase-2;	cytosol; endoplasmic reticulum; extracellular exosome; extracellular matrix; focal adhesion; intrinsic component of plasma membrane; mitochondrion;	apoptotic cell clearance; blood vessel remodeling; branching involved in salivary gland morphogenesis; isopeptide cross-linking via N6-(L-isoglutamyl)-L-lysine; negative regulation of endoplasmic reticulum calcium ion concentration; positive regulation of apoptotic process; positive regulation of cell adhesion; positive regulation of cytosolic calcium ion concentration involved in phospholipase C…	GTP binding; metal ion binding; protein domain specific binding; protein-glutamine gamma-glutamyltransferase activity;
TLGVKQLIVG	VNKMDSTEPPYSQKR	P68104	Q5VTE0		Elongation factor 1-alpha 1;	9.469	150	462	Elongation factor Tu;Eukaryotic elongation factor 1 A-1;Leukocyte receptor cluster member 7;	cortical actin cytoskeleton; cytoplasm; cytoplasmic side of lysosomal membrane; cytosol; eukaryotic translation elongation factor 1 complex; extracellular exosome; extracellular region; extracellular space; ficolin-1-rich granule lumen; membrane; myelin sheath; nucleolus; nucleus; ruffle membrane; secretory granule lumen;	cellular response to epidermal growth factor stimulus; neutrophil degranulation; protein methylation; regulation of chaperone-mediated autophagy; regulation of transcription, DNA-templated; transcription, DNA-templated; translational elongation;	GTP binding; GTPase activity; protein kinase binding; RNA binding; translation elongation factor activity; tRNA binding;
KCNRAPIYVR	VPFLEVNDPGEPSGLETLKDTPPPR	P0DMM9	P0DMN0		Sulfotransferase 1A3;	9.469	77	295	Aryl sulfotransferase 1A3/1A4;Catecholamine-sulfating phenol sulfotransferase;HAST3;M-PST;Monoamine-sulfating phenol sulfotransferase;Placental estrogen sulfotransferase;Sulfotransferase 1A3/1A4;Sulfotransferase, monoamine-preferring;Thermolabile phenol sulfotransferase;	cytosol;	3'-phosphoadenosine 5'-phosphosulfate metabolic process; calcineurin-mediated signaling; cellular response to dopamine; dopamine catabolic process; dopamine receptor signaling pathway; ERK1 and ERK2 cascade; ethanol catabolic process; flavonoid metabolic process; IRE1-mediated unfolded protein response; negative regulation of neuron death; NMDA selective glutamate receptor signaling pathway; ster…	amine sulfotransferase activity; aryl sulfotransferase activity; sulfate binding; sulfotransferase activity;
LGHESDNLLF	VQITGKKPNFEVGSSR	Q6FI81			Anamorsin {ECO:0000255|HAMAP-Rule:MF_03115};	9.469	155	312	Cytokine-induced apoptosis inhibitor 1 {ECO:0000255|HAMAP-Rule:MF_03115};Fe-S cluster assembly protein DRE2 homolog {ECO:0000255|HAMAP-Rule:MF_03115};	cytoplasm; mitochondrial intermembrane space; mitochondrion; nucleolus; nucleoplasm;	apoptotic process; hemopoiesis; iron-sulfur cluster assembly; negative regulation of apoptotic process;	2 iron, 2 sulfur cluster binding; metal ion binding; methyltransferase activity;
DPRYARYLKM	VQVGVPVMAIR	Q9Y3C0			WASH complex subunit 3 {ECO:0000312|HGNC:HGNC:24256};	9.469	141	194	Coiled-coil domain-containing protein 53;	early endosome; WASH complex;	protein transport;
EEYVRESFSL	VQVQPGVDIIR	P46379			Large proline-rich protein BAG6 {ECO:0000305};	9.469	824	1132	BAG family molecular chaperone regulator 6;BCL2-associated athanogene 6 {ECO:0000312|HGNC:HGNC:13919};HLA-B-associated transcript 3 {ECO:0000303|PubMed:2156268};Protein G3;Protein Scythe {ECO:0000303|PubMed:17403783};	BAT3 complex; cytoplasm; cytosol; extracellular exosome; intracellular membrane-bounded organelle; membrane; nucleoplasm; nucleus;	apoptotic process; brain development; cell differentiation; covalent chromatin modification; embryo development; endoplasmic reticulum unfolded protein response; ER-associated misfolded protein catabolic process; immune response-activating cell surface receptor signaling pathway; internal peptidyl-lysine acetylation; intrinsic apoptotic signaling pathway in response to DNA damage by p53 class med…	Hsp70 protein binding; misfolded protein binding; polyubiquitin binding; proteasome binding; receptor binding; ribosome binding; toxic substance binding; ubiquitin protein ligase binding; ubiquitin-specific protease binding;
PVVVASSLGL	VSLGGKATTASQAKAVLSAEQLR	P50454			Serpin H1;	9.469	79	418	47 kDa heat shock protein;Arsenic-transactivated protein 3;Cell proliferation-inducing gene 14 protein;Collagen-binding protein;Rheumatoid arthritis-related antigen RA-A47;	endoplasmic reticulum; endoplasmic reticulum lumen; endoplasmic reticulum-Golgi intermediate compartment; extracellular exosome; membrane raft;	chondrocyte development involved in endochondral bone morphogenesis; collagen biosynthetic process; collagen fibril organization; protein maturation; response to unfolded protein;	collagen binding; RNA binding; serine-type endopeptidase inhibitor activity; unfolded protein binding;
QFGGNPFASL	VSNTSSGEGSQPSR	Q9UMX0			Ubiquilin-1;	9.469	298	589	Protein linking IAP with cytoskeleton 1;	aggresome; autophagosome; cytoplasm; cytoplasmic vesicle; cytosol; endoplasmic reticulum; nucleoplasm; perinuclear region of cytoplasm; plasma membrane; proteasome complex; protein complex;	aggrephagy; autophagosome assembly; autophagosome maturation; cellular response to hypoxia; macroautophagy; negative regulation of store-operated calcium channel activity; negative regulation of toll-like receptor 3 signaling pathway; positive regulation of ER-associated ubiquitin-dependent protein catabolic process; positive regulation of protein ubiquitination; regulation of oxidative stress-in…	identical protein binding; kinase binding; polyubiquitin binding;
GVENCYFPMF	VSQSALEKEKTHVADFAPEVAWVTR	P07814			Bifunctional glutamate/proline--tRNA ligase;	9.469	1080	1512	Bifunctional aminoacyl-tRNA synthetase;Cell proliferation-inducing gene 32 protein;Glutamatyl-prolyl-tRNA synthetase;	aminoacyl-tRNA synthetase multienzyme complex; cytoplasm; cytosol; GAIT complex; intracellular ribonucleoprotein complex; membrane;	cellular response to interferon-gamma; glutamyl-tRNA aminoacylation; negative regulation of translation; prolyl-tRNA aminoacylation; protein complex assembly; tRNA aminoacylation for protein translation;	ATP binding; glutamate-tRNA ligase activity; GTPase binding; proline-tRNA ligase activity; RNA stem-loop binding;
AKHGLYLPTR	VTAIHIDPATHR	P49327			Fatty acid synthase;	9.469	1050	2511		cytosol; extracellular exosome; glycogen granule; Golgi apparatus; melanosome; membrane; mitochondrion; plasma membrane;	acetyl-CoA metabolic process; cellular response to interleukin-4; fatty acid biosynthetic process; fatty acid metabolic process; long-chain fatty-acyl-CoA biosynthetic process; mammary gland development; osteoblast differentiation; pantothenate metabolic process; positive regulation of cellular metabolic process;	3-hydroxyoctanoyl-[acyl-carrier-protein] dehydratase activity; 3-hydroxypalmitoyl-[acyl-carrier-protein] dehydratase activity; 3-oxo-pimeloyl-[acp] methyl ester reductase activity; 3-oxoacyl-[acyl-carrier-protein] reductase (NADPH) activity; 3-oxoacyl-[acyl-carrier-protein] synthase activity; [acyl-carrier-protein] S-acetyltransferase activity; [acyl-carrier-protein] S-malonyltransferase activity…
RDLEWVERLD	VTLGPVPEIGGSEAPAPQNKDQKAVDPEDDFQR	Q99848			Probable rRNA-processing protein EBP2;	9.469	70	306	EBNA1-binding protein 2;Nucleolar protein p40;	nuclear periphery; nucleolus; nucleus; preribosome, large subunit precursor;	ribosomal large subunit biogenesis; rRNA processing;	RNA binding;
KKNNLRDWLR	VVANSKESYELR	P35268			60S ribosomal protein L22;	9.469	100	128	EBER-associated protein;Epstein-Barr virus small RNA-associated protein;Heparin-binding protein HBp15;Large ribosomal subunit protein eL22 {ECO:0000303|PubMed:24524803};	cytoplasm; cytosol; cytosolic large ribosomal subunit; extracellular exosome; extracellular matrix; focal adhesion; intracellular ribonucleoprotein complex; nucleus;	alpha-beta T cell differentiation; cytoplasmic translation; nuclear-transcribed mRNA catabolic process, nonsense-mediated decay; rRNA processing; SRP-dependent cotranslational protein targeting to membrane; translation; translational initiation; viral transcription;	heparin binding; RNA binding; structural constituent of ribosome;
GQGLVPVVEC	VVDGQLFSGSQTPR	P0C7T5			Ataxin-1-like;	9.469	304	689	Brother of ataxin-1;	dendrite; nucleolus; nucleoplasm; nucleus;	extracellular matrix organization; lung alveolus development; negative regulation of transcription from RNA polymerase II promoter; positive regulation of hematopoietic stem cell proliferation; transcription, DNA-templated;	DNA binding; RNA binding;
MDDDIAAL	VVDNGSGMCKAGFAGDDAPR	P60709			Actin, cytoplasmic 1;	9.469	7	375	Beta-actin;	blood microparticle; cortical cytoskeleton; cytoplasm; cytoplasmic ribonucleoprotein granule; cytoskeleton; cytosol; dense body; extracellular exosome; extracellular space; focal adhesion; intracellular ribonucleoprotein complex; membrane; myelin sheath; NuA4 histone acetyltransferase complex; nuclear chromatin; nucleoplasm; plasma membrane; protein complex; vesicle;	ATP-dependent chromatin remodeling; cell junction assembly; ephrin receptor signaling pathway; Fc-gamma receptor signaling pathway involved in phagocytosis; membrane organization; movement of cell or subcellular component; platelet aggregation; positive regulation of gene expression, epigenetic; postsynaptic actin cytoskeleton organization; protein deubiquitination; retina homeostasis; substantia…	ATP binding; identical protein binding; kinesin binding; nitric-oxide synthase binding; structural constituent of cytoskeleton; structural constituent of postsynaptic actin cytoskeleton; Tat protein binding;
SRMAKPEEVL	VVENDQGEVVR	O14980			Exportin-1;	9.469	430	1071	Chromosome region maintenance 1 protein homolog;	annulate lamellae; Cajal body; cytoplasm; cytosol; intracellular membrane-bounded organelle; intracellular ribonucleoprotein complex; kinetochore; membrane; nuclear envelope; nuclear membrane; nucleolus; nucleoplasm; nucleus;	intracellular transport of virus; mRNA transport; negative regulation of transcription from RNA polymerase II promoter; protein export from nucleus; protein localization to nucleus; regulation of centrosome duplication; regulation of mRNA stability; regulation of protein catabolic process; regulation of protein export from nucleus; response to drug; ribosomal large subunit export from nucleus; ri…	nuclear export signal receptor activity; nucleocytoplasmic transporter activity; protein domain specific binding; Ran GTPase binding; RNA binding; transporter activity;
AQLAQYNFIL	VVGEKEKISGTVNIR	P26639			Threonine--tRNA ligase, cytoplasmic;	9.469	673	723	Threonyl-tRNA synthetase;	actin cytoskeleton; cytoplasm; cytosol; extracellular exosome;	threonyl-tRNA aminoacylation; translation; tRNA aminoacylation for protein translation;	ATP binding; protein homodimerization activity; threonine-tRNA ligase activity;
RKRKLPVVSS	VVKVKKFNHDGEEEEEDDDYGSR	Q6PJT7			Zinc finger CCCH domain-containing protein 14;	9.469	300	736	Mammalian suppressor of tau pathology-2;Renal carcinoma antigen NY-REN-37;	cytoplasm; nuclear speck; nucleolus; nucleus;		metal ion binding; RNA binding;
PYPEAKIGRF	VVQNVSAQKDGEKSR	Q92598			Heat shock protein 105 kDa;	9.469	461	858	Antigen NY-CO-25;Heat shock 110 kDa protein;	cytoplasm; cytosol; endocytic vesicle lumen; extracellular exosome; extracellular region; microtubule; nucleoplasm;	chaperone mediated protein folding requiring cofactor; negative regulation of establishment of protein localization to mitochondrion; negative regulation of intrinsic apoptotic signaling pathway in response to hydrogen peroxide; negative regulation of p38MAPK cascade; positive regulation of MHC class I biosynthetic process; positive regulation of NK T cell activation; positive regulation of prote…	adenyl-nucleotide exchange factor activity; alpha-tubulin binding; ATP binding;
FLRGVEKNVM	VVSCVYPSSEKNNSNSLNR	Q9NY27			Serine/threonine-protein phosphatase 4 regulatory subunit 2;	9.469	129	417		centrosome; cytoplasm; nucleoplasm; nucleus; protein phosphatase 4 complex;	cellular protein modification process; mRNA processing; regulation of double-strand break repair via homologous recombination; RNA splicing;	protein binding, bridging; protein phosphatase regulator activity;
LGSRPPLSRL	VVVKKAKADPDCSNGQPQAAPTPGAPQNR	Q9BW85			Coiled-coil domain-containing protein 94;	9.469	262	323
ARWIHPASGR	VYNIEFNPPKTVGIDDLTGEPLIQR	Q9UIJ7			GTP:AMP phosphotransferase AK3, mitochondrial {ECO:0000255|HAMAP-Rule:MF_03169};	9.469	135	227	Adenylate kinase 3 {ECO:0000255|HAMAP-Rule:MF_03169};Adenylate kinase 3 alpha-like 1 {ECO:0000255|HAMAP-Rule:MF_03169};	mitochondrial matrix; mitochondrion;	AMP metabolic process; blood coagulation; GTP metabolic process; ITP metabolic process; UTP metabolic process;	ATP binding; GTP binding; nucleoside triphosphate adenylate kinase activity;
DISVCEWYQR	VYQSLCPTSWVTDWDEQR	P14854			Cytochrome c oxidase subunit 6B1;	9.469	58	86	Cytochrome c oxidase subunit VIb isoform 1;	mitochondrial inner membrane; mitochondrial intermembrane space;	mitochondrial electron transport, cytochrome c to oxygen; substantia nigra development;	cytochrome-c oxidase activity;
GKFERGGNSR	WCDKSDEDDWSKPLPPSER	O00571			ATP-dependent RNA helicase DDX3X;	9.469	125	662	DEAD box protein 3, X-chromosomal;DEAD box, X isoform;Helicase-like protein 2;	cytoplasm; cytoplasmic stress granule; cytosol; extracellular exosome; extracellular region; ficolin-1-rich granule lumen; mitochondrial outer membrane; nuclear speck; nucleus; secretory granule lumen;	cellular response to arsenic-containing substance; cellular response to osmotic stress; chromosome segregation; extrinsic apoptotic signaling pathway via death domain receptors; innate immune response; intracellular signal transduction; intrinsic apoptotic signaling pathway; mature ribosome assembly; negative regulation of apoptotic process; negative regulation of cell growth; negative regulation…	ATP binding; ATP-dependent DNA helicase activity; ATP-dependent RNA helicase activity; ATPase activity; cadherin binding; CTPase activity; DNA binding; eukaryotic initiation factor 4E binding; GTPase activity; mRNA 5'-UTR binding; nucleoside-triphosphatase activity; poly(A) binding; ribosomal small subunit binding; RNA binding; RNA stem-loop binding; RNA strand annealing activity; transcription f…
KKIQQNTFTR	WCNEHLKCVNKR	O75369			Filamin-B;	9.469	23	2602	ABP-278;ABP-280 homolog;Actin-binding-like protein;Beta-filamin;Filamin homolog 1;Filamin-3;Thyroid autoantigen;Truncated actin-binding protein;	actin cytoskeleton; brush border; cell cortex; cytoplasm; cytosol; extracellular exosome; extracellular matrix; focal adhesion; integral component of membrane; neuron projection; neuronal cell body; nucleus; plasma membrane; stress fiber; Z disc;	actin cytoskeleton organization; cytoskeletal anchoring at plasma membrane; epithelial cell morphogenesis; keratinocyte development; signal transduction; skeletal muscle tissue development;	actin binding; cadherin binding; identical protein binding; RNA binding;
KKIQQNTFTR	WCNEHLKCVSKR	P21333			Filamin-A;	9.469	50	2647	Actin-binding protein 280;Alpha-filamin;Endothelial actin-binding protein;Filamin-1;Non-muscle filamin;	actin cytoskeleton; actin filament; apical dendrite; cell-cell junction; cortical cytoskeleton; cytoplasm; cytosol; dendritic shaft; extracellular exosome; extracellular matrix; extracellular region; focal adhesion; membrane; Myb complex; neuronal cell body; nucleolus; nucleus; perinuclear region of cytoplasm; plasma membrane; Z disc;	actin crosslink formation; actin cytoskeleton reorganization; adenylate cyclase-inhibiting dopamine receptor signaling pathway; cell junction assembly; cerebral cortex development; cilium assembly; cytoplasmic sequestering of protein; establishment of protein localization; formation of radial glial scaffolds; mitotic spindle assembly; mRNA transcription from RNA polymerase II promoter; negative r…	actin filament binding; cadherin binding; Fc-gamma receptor I complex binding; G-protein coupled receptor binding; glycoprotein binding; GTPase binding; ion channel binding; kinase binding; mu-type opioid receptor binding; potassium channel regulator activity; protein homodimerization activity; Rac GTPase binding; Ral GTPase binding; Rho GTPase binding; RNA binding; signal transducer activity; SM…
FRQAFPNTNR	WFLTCINQPQFR	P26641			Elongation factor 1-gamma;	9.469	188	437	eEF-1B gamma;	cytoplasm; cytosol; extracellular exosome; membrane; nucleus;	response to virus; translational elongation;	cadherin binding; translation elongation factor activity;
FKAGSKRLFF	WMQEPKTDQDEEHCR	Q16186			Proteasomal ubiquitin receptor ADRM1;	9.469	106	407	110 kDa cell membrane glycoprotein;Adhesion-regulating molecule 1;Proteasome regulatory particle non-ATPase 13;Rpn13 homolog;	cytosol; integral component of plasma membrane; membrane; nucleoplasm; plasma membrane; proteasome complex; proteasome regulatory particle, lid subcomplex;	proteasome assembly; protein deubiquitination; transcription elongation from RNA polymerase II promoter; ubiquitin-dependent protein catabolic process;	endopeptidase activator activity; protease binding; proteasome binding; ubiquitin binding;
FGDPASSLFR	WYKEAKPGAAEPEVGVPSSLSPSSPSSSWTETDVEER	Q6L8Q7			2',5'-phosphodiesterase 12;	9.469	195	609	Mitochondrial deadenylase;	mitochondrial matrix;	mRNA processing;	metal ion binding; poly(A)-specific ribonuclease activity;
SPESHGHWRE	WYYGVNNDSLEER	Q9NVR5			Protein kintoun {ECO:0000255|HAMAP-Rule:MF_03069};	9.469	609	837	Dynein assembly factor 2, axonemal {ECO:0000255|HAMAP-Rule:MF_03069};	cytoplasm; cytosol;	axonemal dynein complex assembly; cilium-dependent cell motility; response to retinoic acid;
CLDEDCLGCF	YACPACGSTKCGAECR	Q8N8R7			ARL14 effector protein;	9.469	219	260	ARF7 effector protein;	cytosol; focal adhesion; intracellular membrane-bounded organelle; nucleolus; nucleus; plasma membrane;
HFPEFPATRA	YADSYYYEDGGMKPR	Q8IVM0			Coiled-coil domain-containing protein 50;	9.469	138	306	Protein Ymer;	cytosol;	sensory perception of sound;	ubiquitin protein ligase binding;
ISRAASVFVL	YATSCANNFAMKGKR	Q9NRF9			DNA polymerase epsilon subunit 3;	9.469	45	147	Arsenic-transactivated protein;Chromatin accessibility complex 17 kDa protein;DNA polymerase II subunit 3;DNA polymerase epsilon subunit p17;	Ada2/Gcn5/Ada3 transcription activator complex; epsilon DNA polymerase complex; nucleoplasm; nucleus;	DNA replication; DNA replication initiation; G1/S transition of mitotic cell cycle; histone H3 acetylation; telomere maintenance via recombination;	DNA binding; DNA-directed DNA polymerase activity; protein heterodimerization activity;
CGGPGVSDAY	YCKECTIQEKDR	Q7RTV0			PHD finger-like domain-containing protein 5A;	9.469	69	110	Splicing factor 3B-associated 14 kDa protein;	catalytic step 2 spliceosome; nuclear matrix; nuclear speck; nucleoplasm; precatalytic spliceosome; U12-type spliceosomal complex; U2 snRNP;	mRNA splicing, via spliceosome; positive regulation of transcription, DNA-templated; transcription, DNA-templated;	DNA binding; RNA binding; transcription factor activity, sequence-specific DNA binding;
LPEKDCRYAL	YDASFETKESR	P60981			Destrin;	9.469	83	165	Actin-depolymerizing factor;	actin cytoskeleton; cortical actin cytoskeleton; extracellular exosome;	actin filament depolymerization; actin filament fragmentation; actin filament severing; actin polymerization or depolymerization; positive regulation of actin filament depolymerization;	actin filament binding;
KAKLAEQAER	YDDMAACMKSVTEQGAELSNEER	P63104			14-3-3 protein zeta/delta;	9.469	17	245	Protein kinase C inhibitor protein 1;	blood microparticle; cytoplasm; cytoplasmic vesicle membrane; cytosol; extracellular exosome; extracellular space; focal adhesion; melanosome; mitochondrion; nucleoplasm; nucleus; vesicle;	establishment of Golgi localization; Golgi reassembly; membrane organization; negative regulation of apoptotic process; platelet activation; positive regulation of protein insertion into mitochondrial membrane involved in apoptotic signaling pathway; protein targeting; regulation of mRNA stability; signal transduction;	cadherin binding; identical protein binding; ion channel binding; protein domain specific binding; protein kinase binding; RNA binding; transcription factor binding; ubiquitin protein ligase binding;
[truncated: 3,719 more rows]

## Sheet: S1b_pH 5.5, rep2
Table S1b. Results of TAILS analysis at pH5.5, replicate 2.
Results shown were pre-filtered for cleavage events with greater than 2-fold (pH 5.5) or greater than 1.5-fold (pH 7) enrichment in HERV-K(HML-2) protease-treated Hela total cell lysate versus control. Chemically dimethylated cleavage sites are shown.
nonprime	prime	Id1	Id2	Id3	name	log2 (HML-2 / cntrl)	Position	Protein length	Alternate names	GO compartment	GO process	GO function
MAQHFSL	AACDVVGFDLDHTLCR	Q5TFE4			5'-nucleotidase domain-containing protein 1;	9.966	6	455				5'-nucleotidase activity; metal ion binding;
[truncated: 2,639 more rows]

## Sheet: S1c_pH 7, rep1
Table S1c. Results of TAILS analysis at pH7, replicate 1.
[truncated: 1,078 more rows]

## Sheet: S1d_pH 7, rep2 
Table S1d. Results of TAILS analysis at pH7, replicate 2.
[truncated: 516 more rows]

[truncated: 4 more sheets: S2_multiple sites, S3_COSMIC, S4_OMIM, S5_clone IDs]
